# Supplementary material
Source: publisher figshare collection journal article supplement (https://gsajournals.figshare.com/ndownloader/files/29131182)
Supplement: Supplementary file 1 [file 29131182]

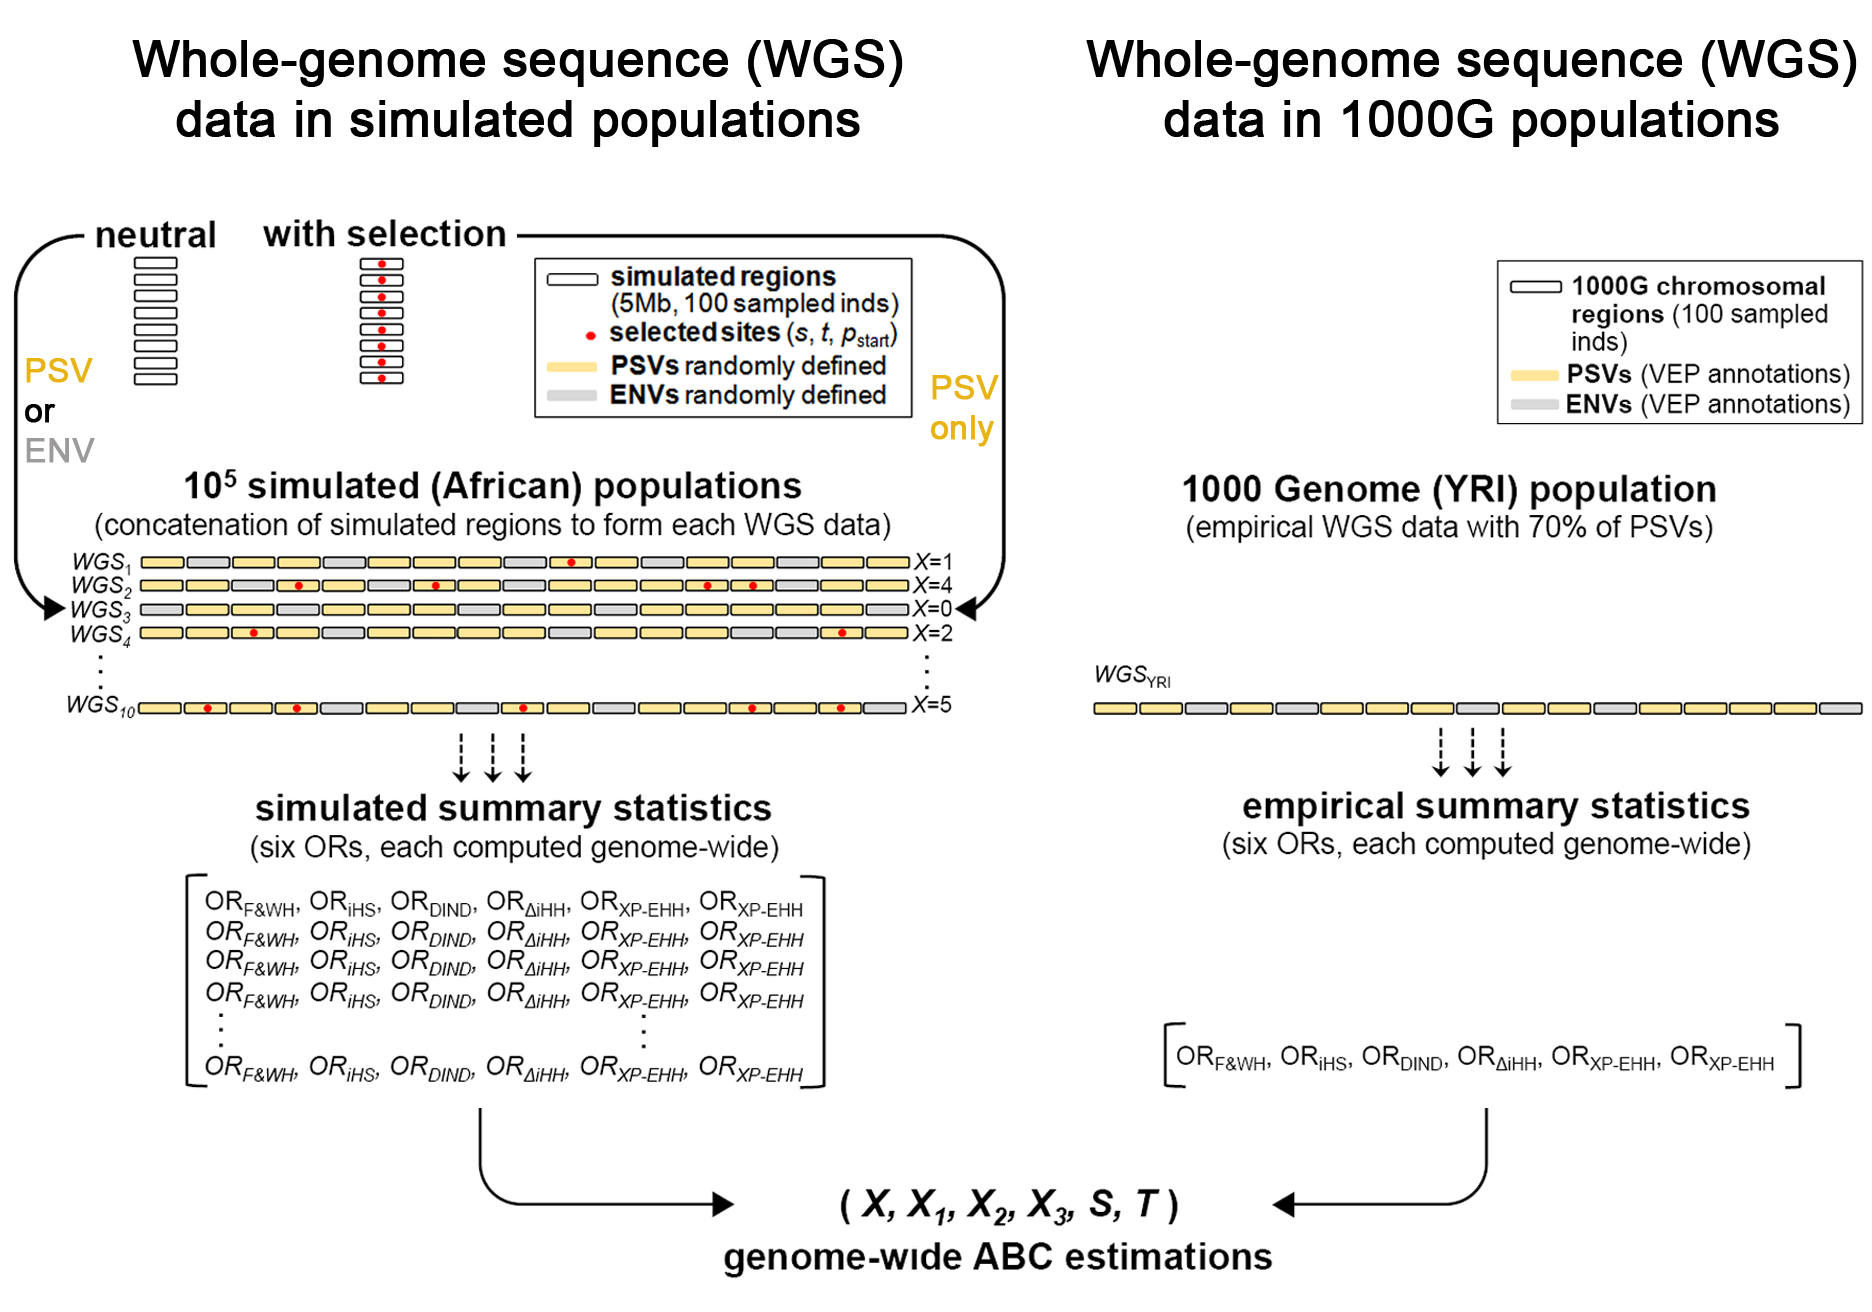


**Figure S1. Simulated and empirical whole-genome sequence data.** Graphical illustration showing the different steps in ABC (the African YRI population is used as an example). (Left panel) Simulated WGS data (simulations performed under the African demography). The WGS are built by randomly drawing neutral and selected regions simulated under the desired sweep scenario. The number of selected regions (sweeps) *X* is randomly drawn from a flat prior, , and the simulated regions containing the ENV (grey) and PSV (yellow) SNPs are randomly defined (70% of PSVs to reproduce the proportion observed in the empirical WGS data shown on the right-hand side). The red dots, which are the selection targets inserted in the middle of each simulated region, as well as nearby SNPs are all contained in the PSV regions. The concatenation of the genomic regions represented in the figure, is purely a theoretical view. The order of genomic regions has no effect on the analysis since each region was trimmed in order to avoid the computation of neutrality statistics across the junctions. The frequency of the selected allele at the beginning of selection *p*start, the selection coefficient *s* and the age of selection *t* of the *X* simulated sweeps are drawn from various distributions depending on the sweep scenario investigated. In this study we considered two scenarios: the incomplete sweep scenario and the sweep scenario simulated using various distributions of *s* and *t*. When a WGS dataset is built, the candidate SNPs are determined based on genome-wide thresholds for the six neutrality statistics used in order to compute the corresponding ORs. Finally, the 105 simulated WGSs used to perform the ABC estimations in 1000G populations, i.e., the ABC simulations, are summarized by a matrix with 105 rows and six columns. (Right panel) Empirical WGS data in the YRI 1000G population. The ENVs and PSVs are determined using the VEP (Ensembl Variant Effect Predictor) annotations. The candidate SNPs are determined based on genome-wide thresholds for the six neutrality statistics used in order to compute the corresponding 1000G ORs. (Bottom panel) The matrix of simulated ORs and the vector of 1000G ORs are used in a standard ABC method.


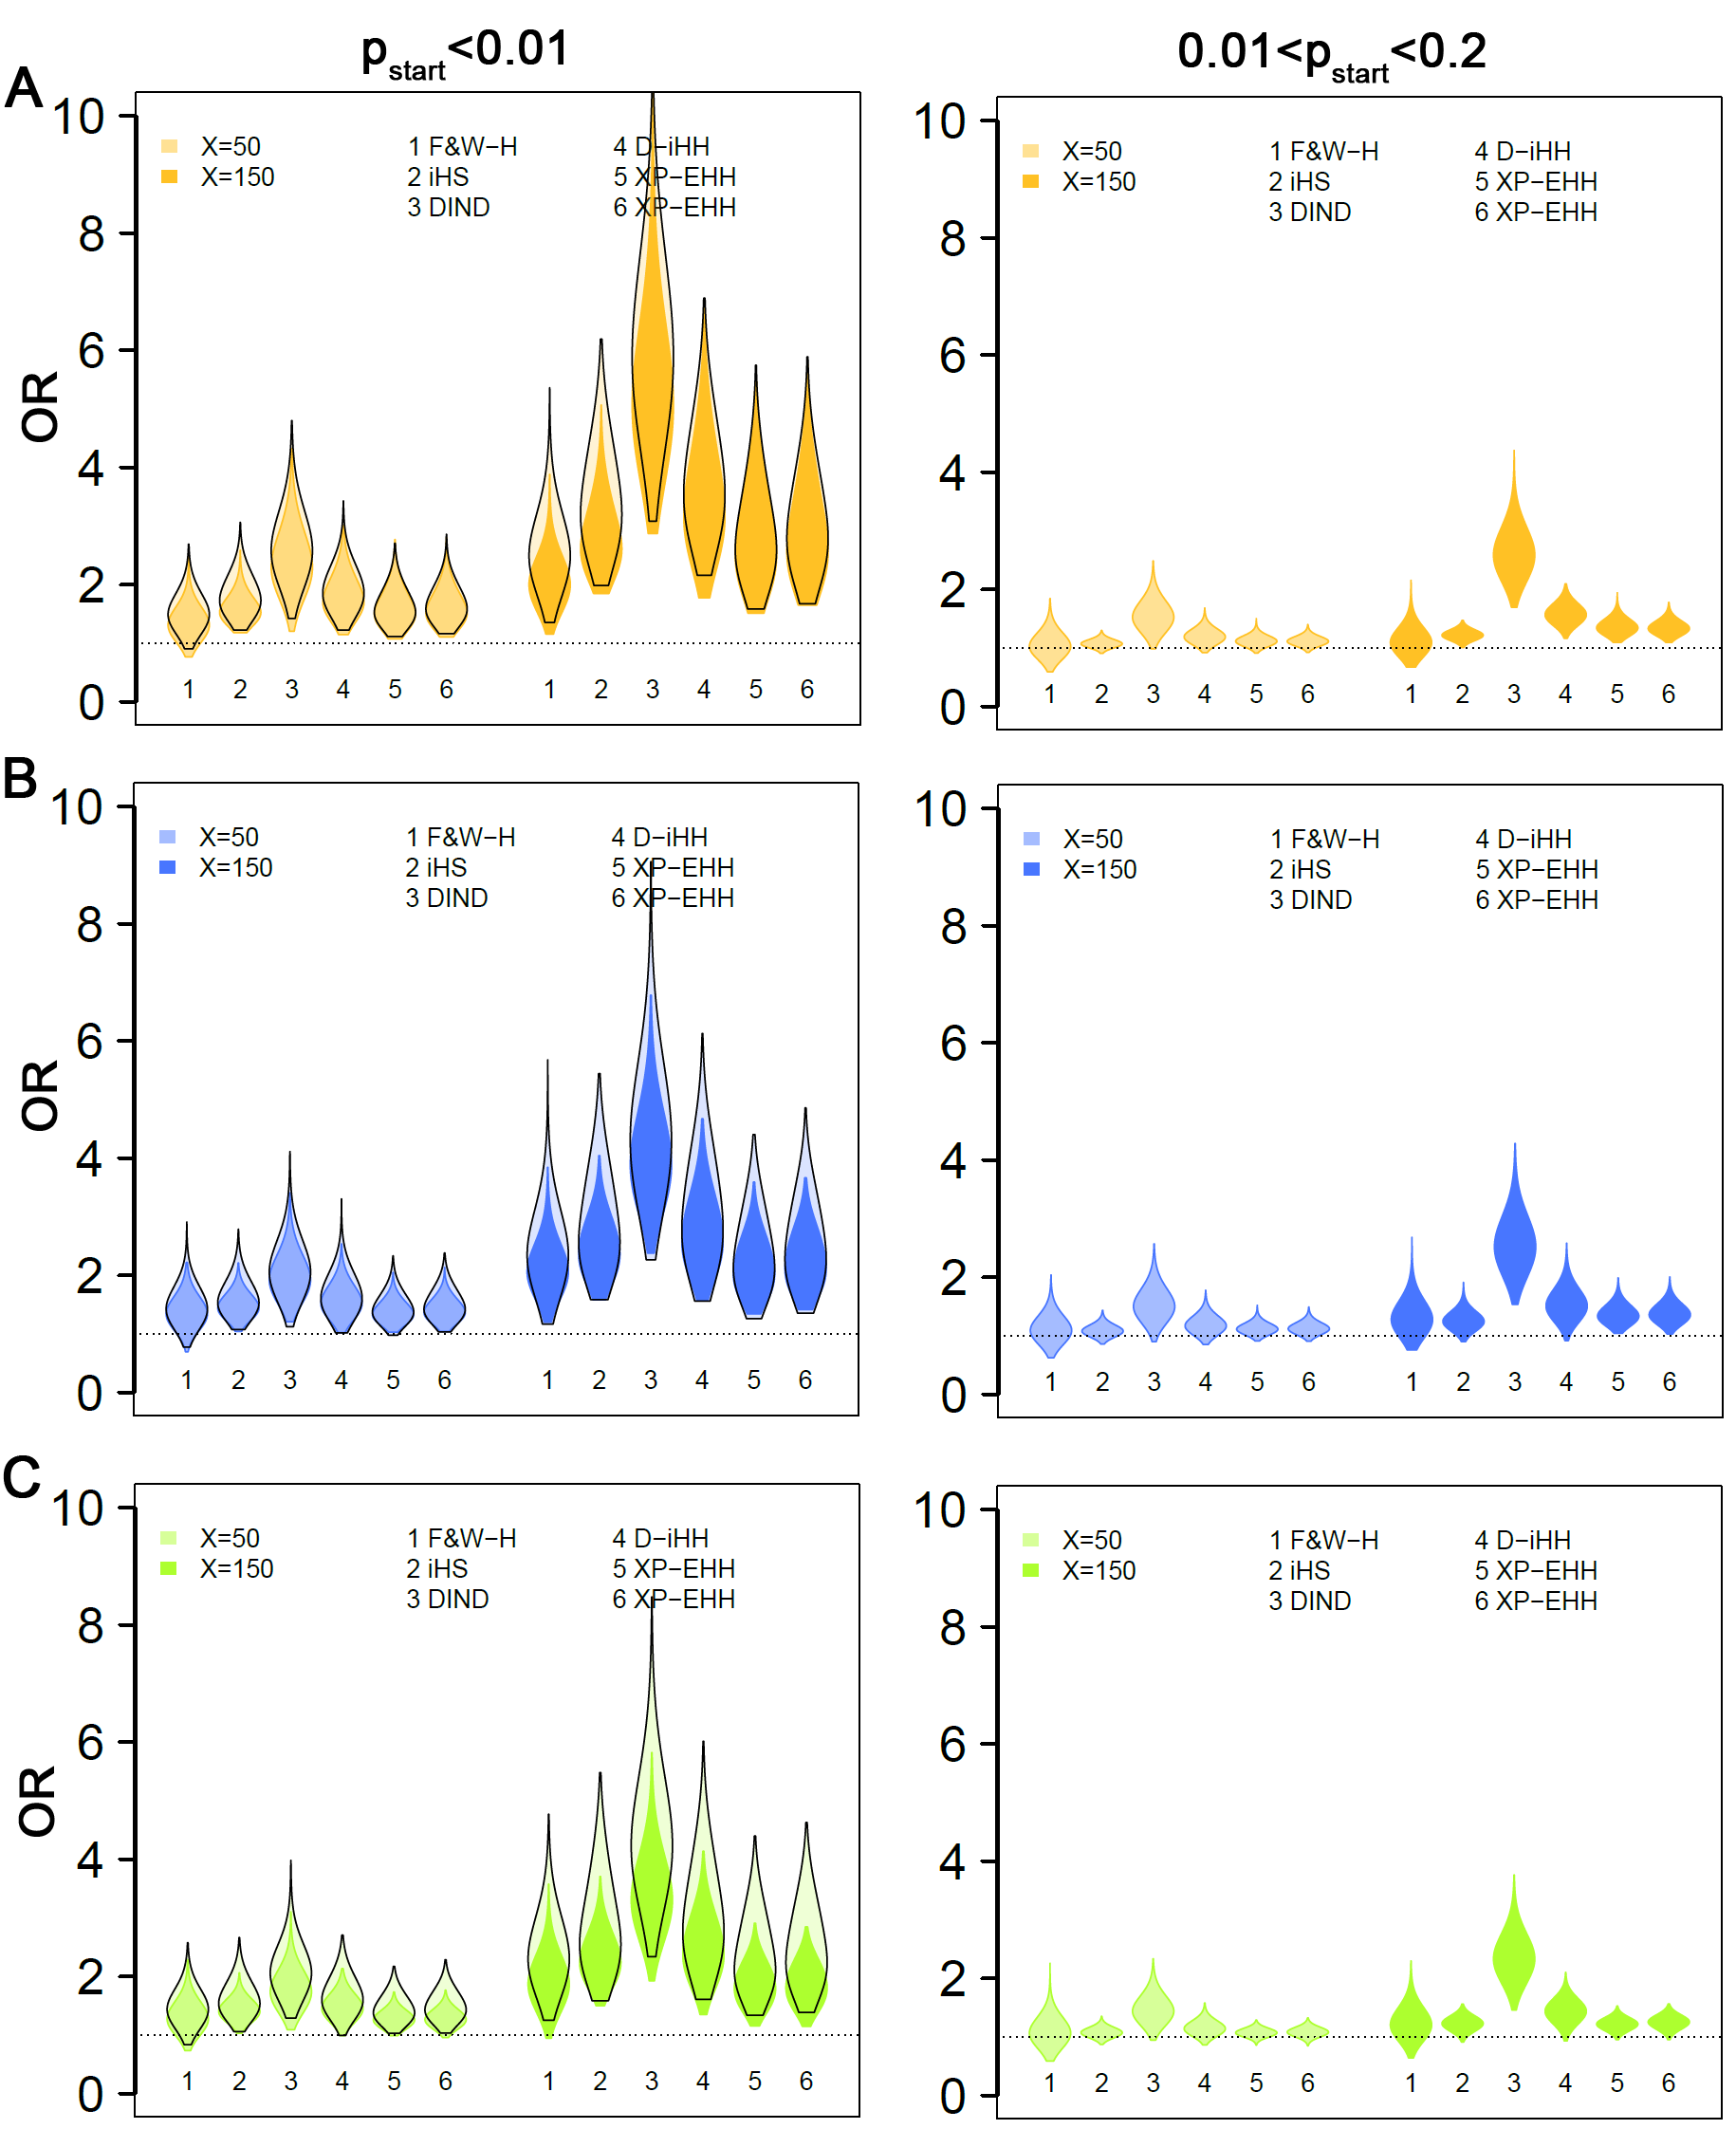


**Figure S2. Simulated ORs for different categories of incomplete sweeps**. Fixed numbers of incomplete sweeps, , were simulated per WGS data in African (**A**), European (**B**) and East Asian (**C**) populations (1,000 simulated WGSs for each value of *X*). PSVs are randomly defined in simulations (70% of the simulated genomes). (Left panels) Sweeps simulated using frequency at the onset of selection ranged from to 0.01 (SDN and SSV merged together). Black empty violin plots show the ORs obtained when simulating SDN alone. (Right panels) Sweeps from standing variation simulated using frequency at the onset of selection ranged from 0.01 to 0.2.

**
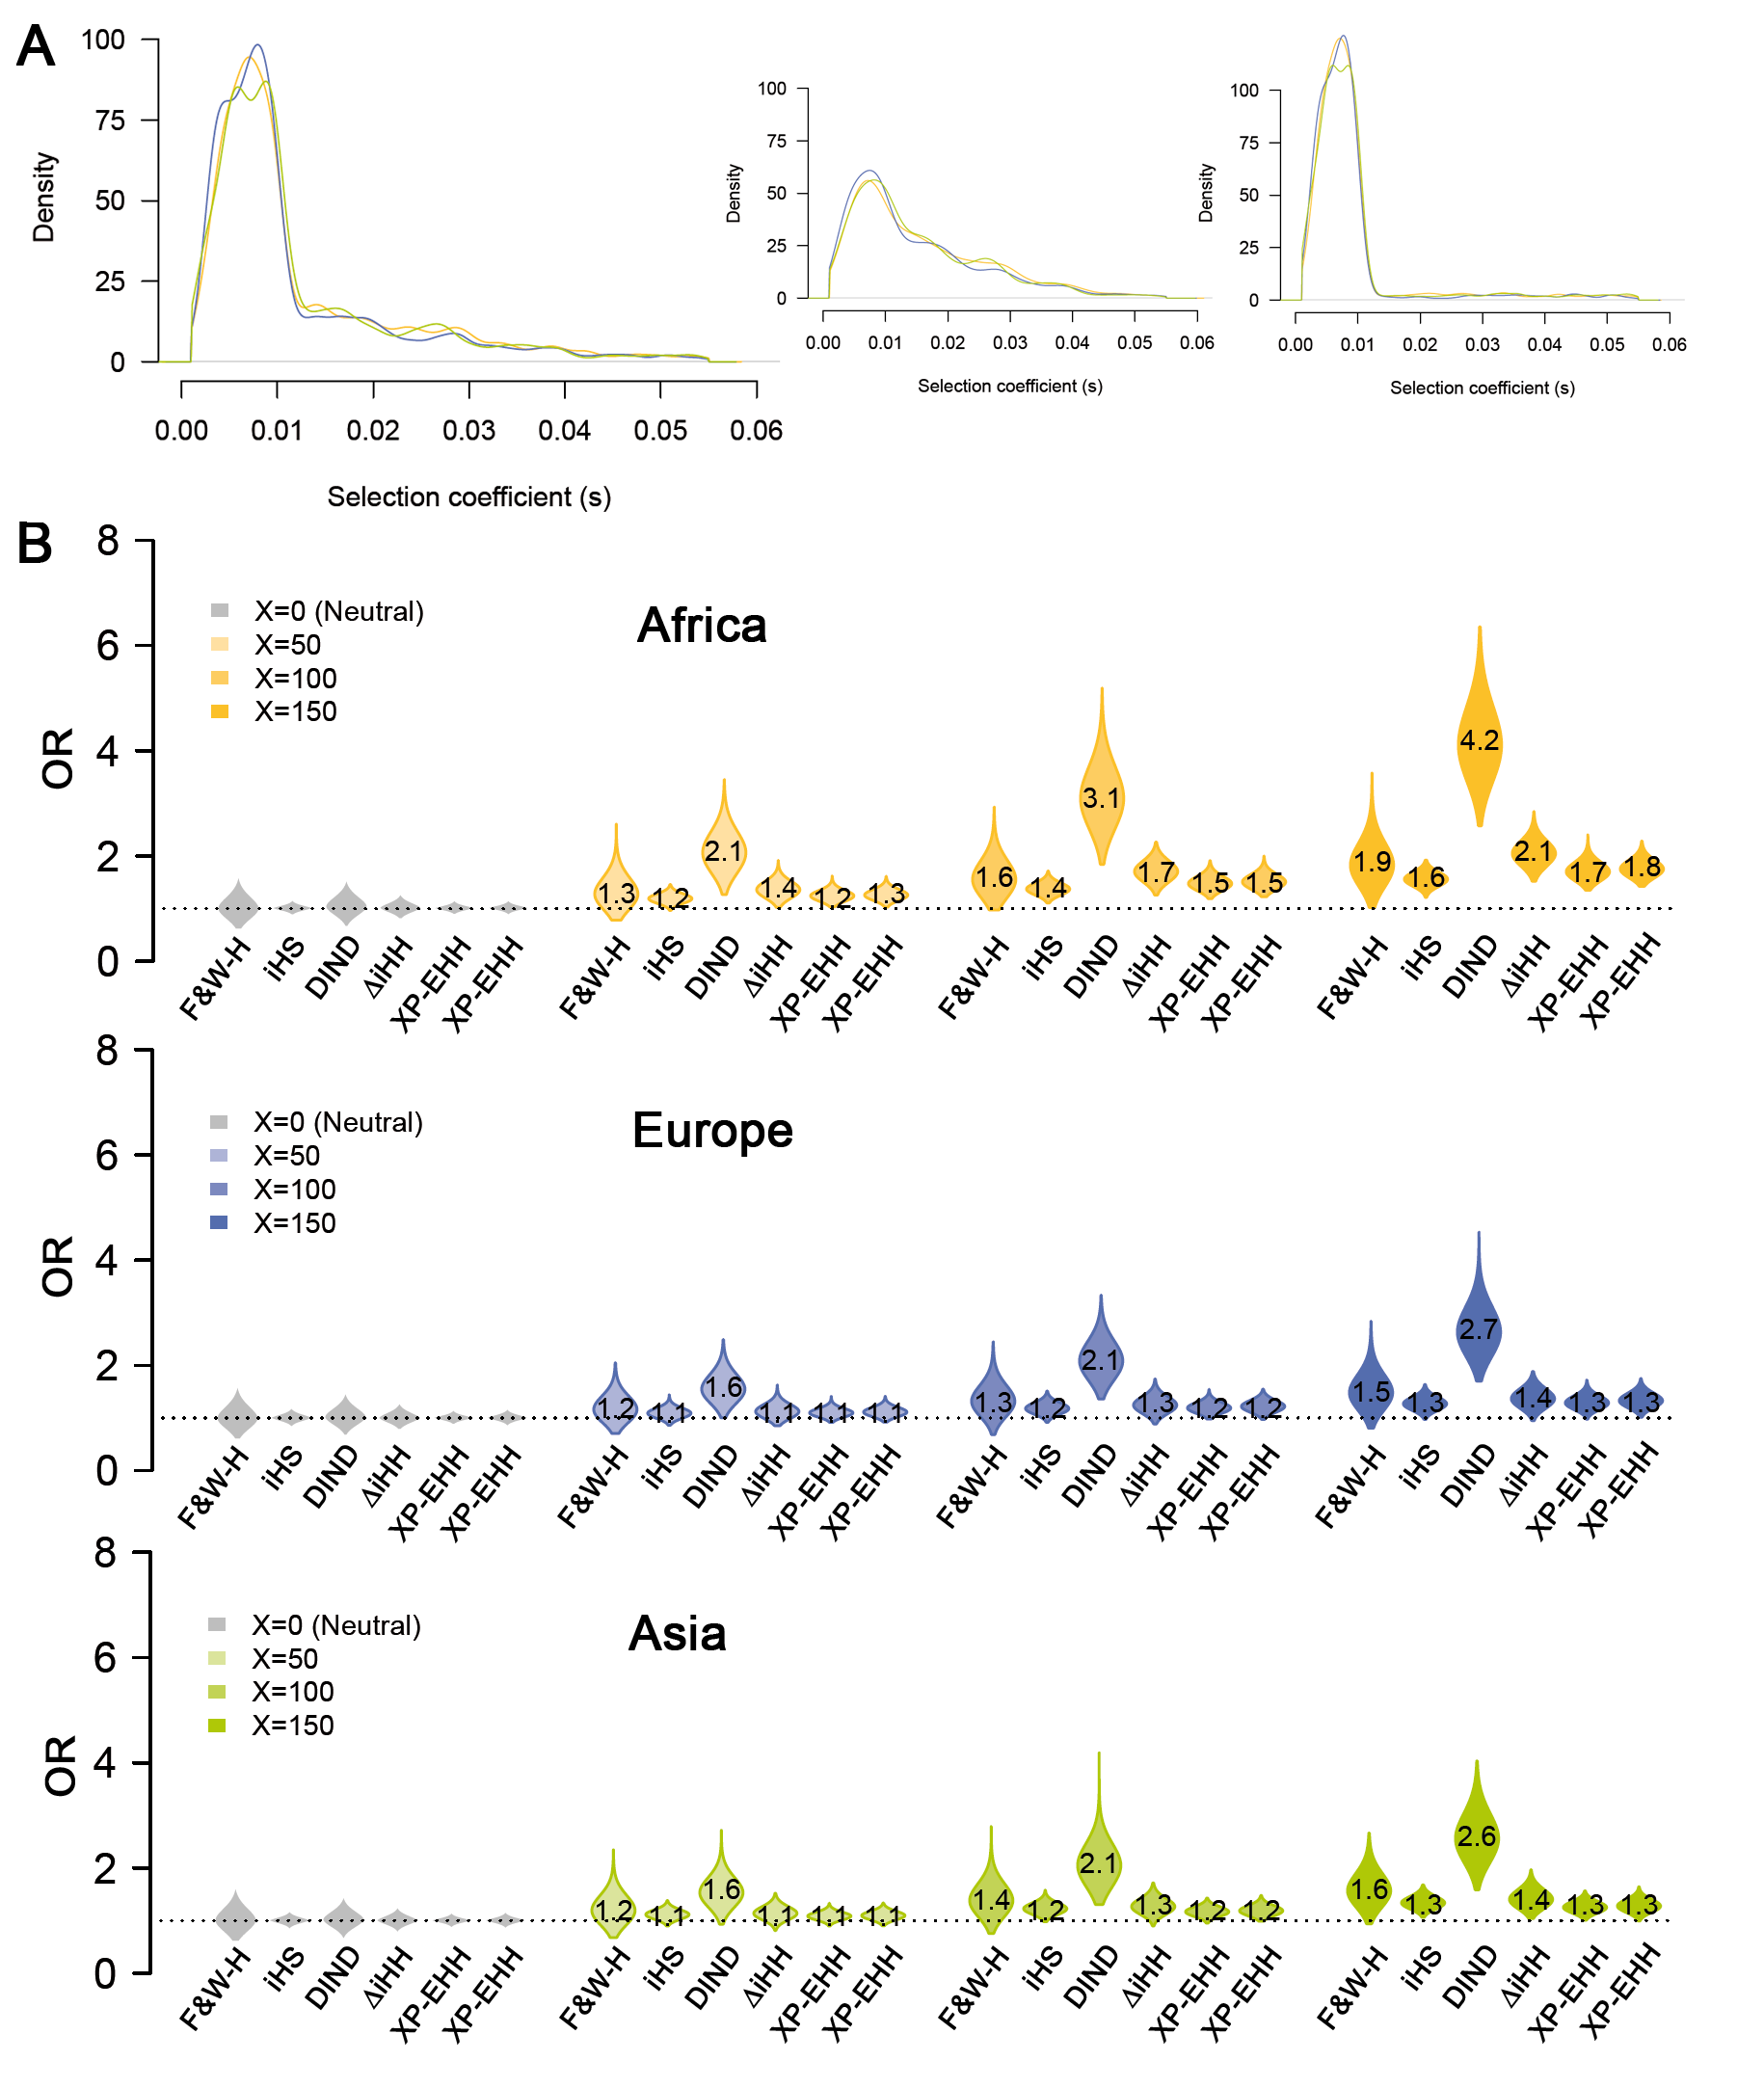
**

**Figure S3. Relationships between the simulated ORs and *X* (sweep scenario).** ORs obtained with fixed numbers of sweeps per simulated WGS data in African, European and East Asian populations (1,000 simulated WGSs in each case). The simulated sweeps can be either complete or incomplete with a frequency at the onset of selection varying from to 0.2 (SDN and SSV merged together). (**A**) (Left panel) Distributions of *s* underlying the *X* sweeps simulated per population and WGS data. The distribution used is a mixture between a Gamma distribution and a L-shape distribution (middle and right panels). (**B**) Simulated ORs for Fay & Wu’s *H* (F&W-*H*), iHS, DIND, ΔiHH and two pairwise XP-EHHs.


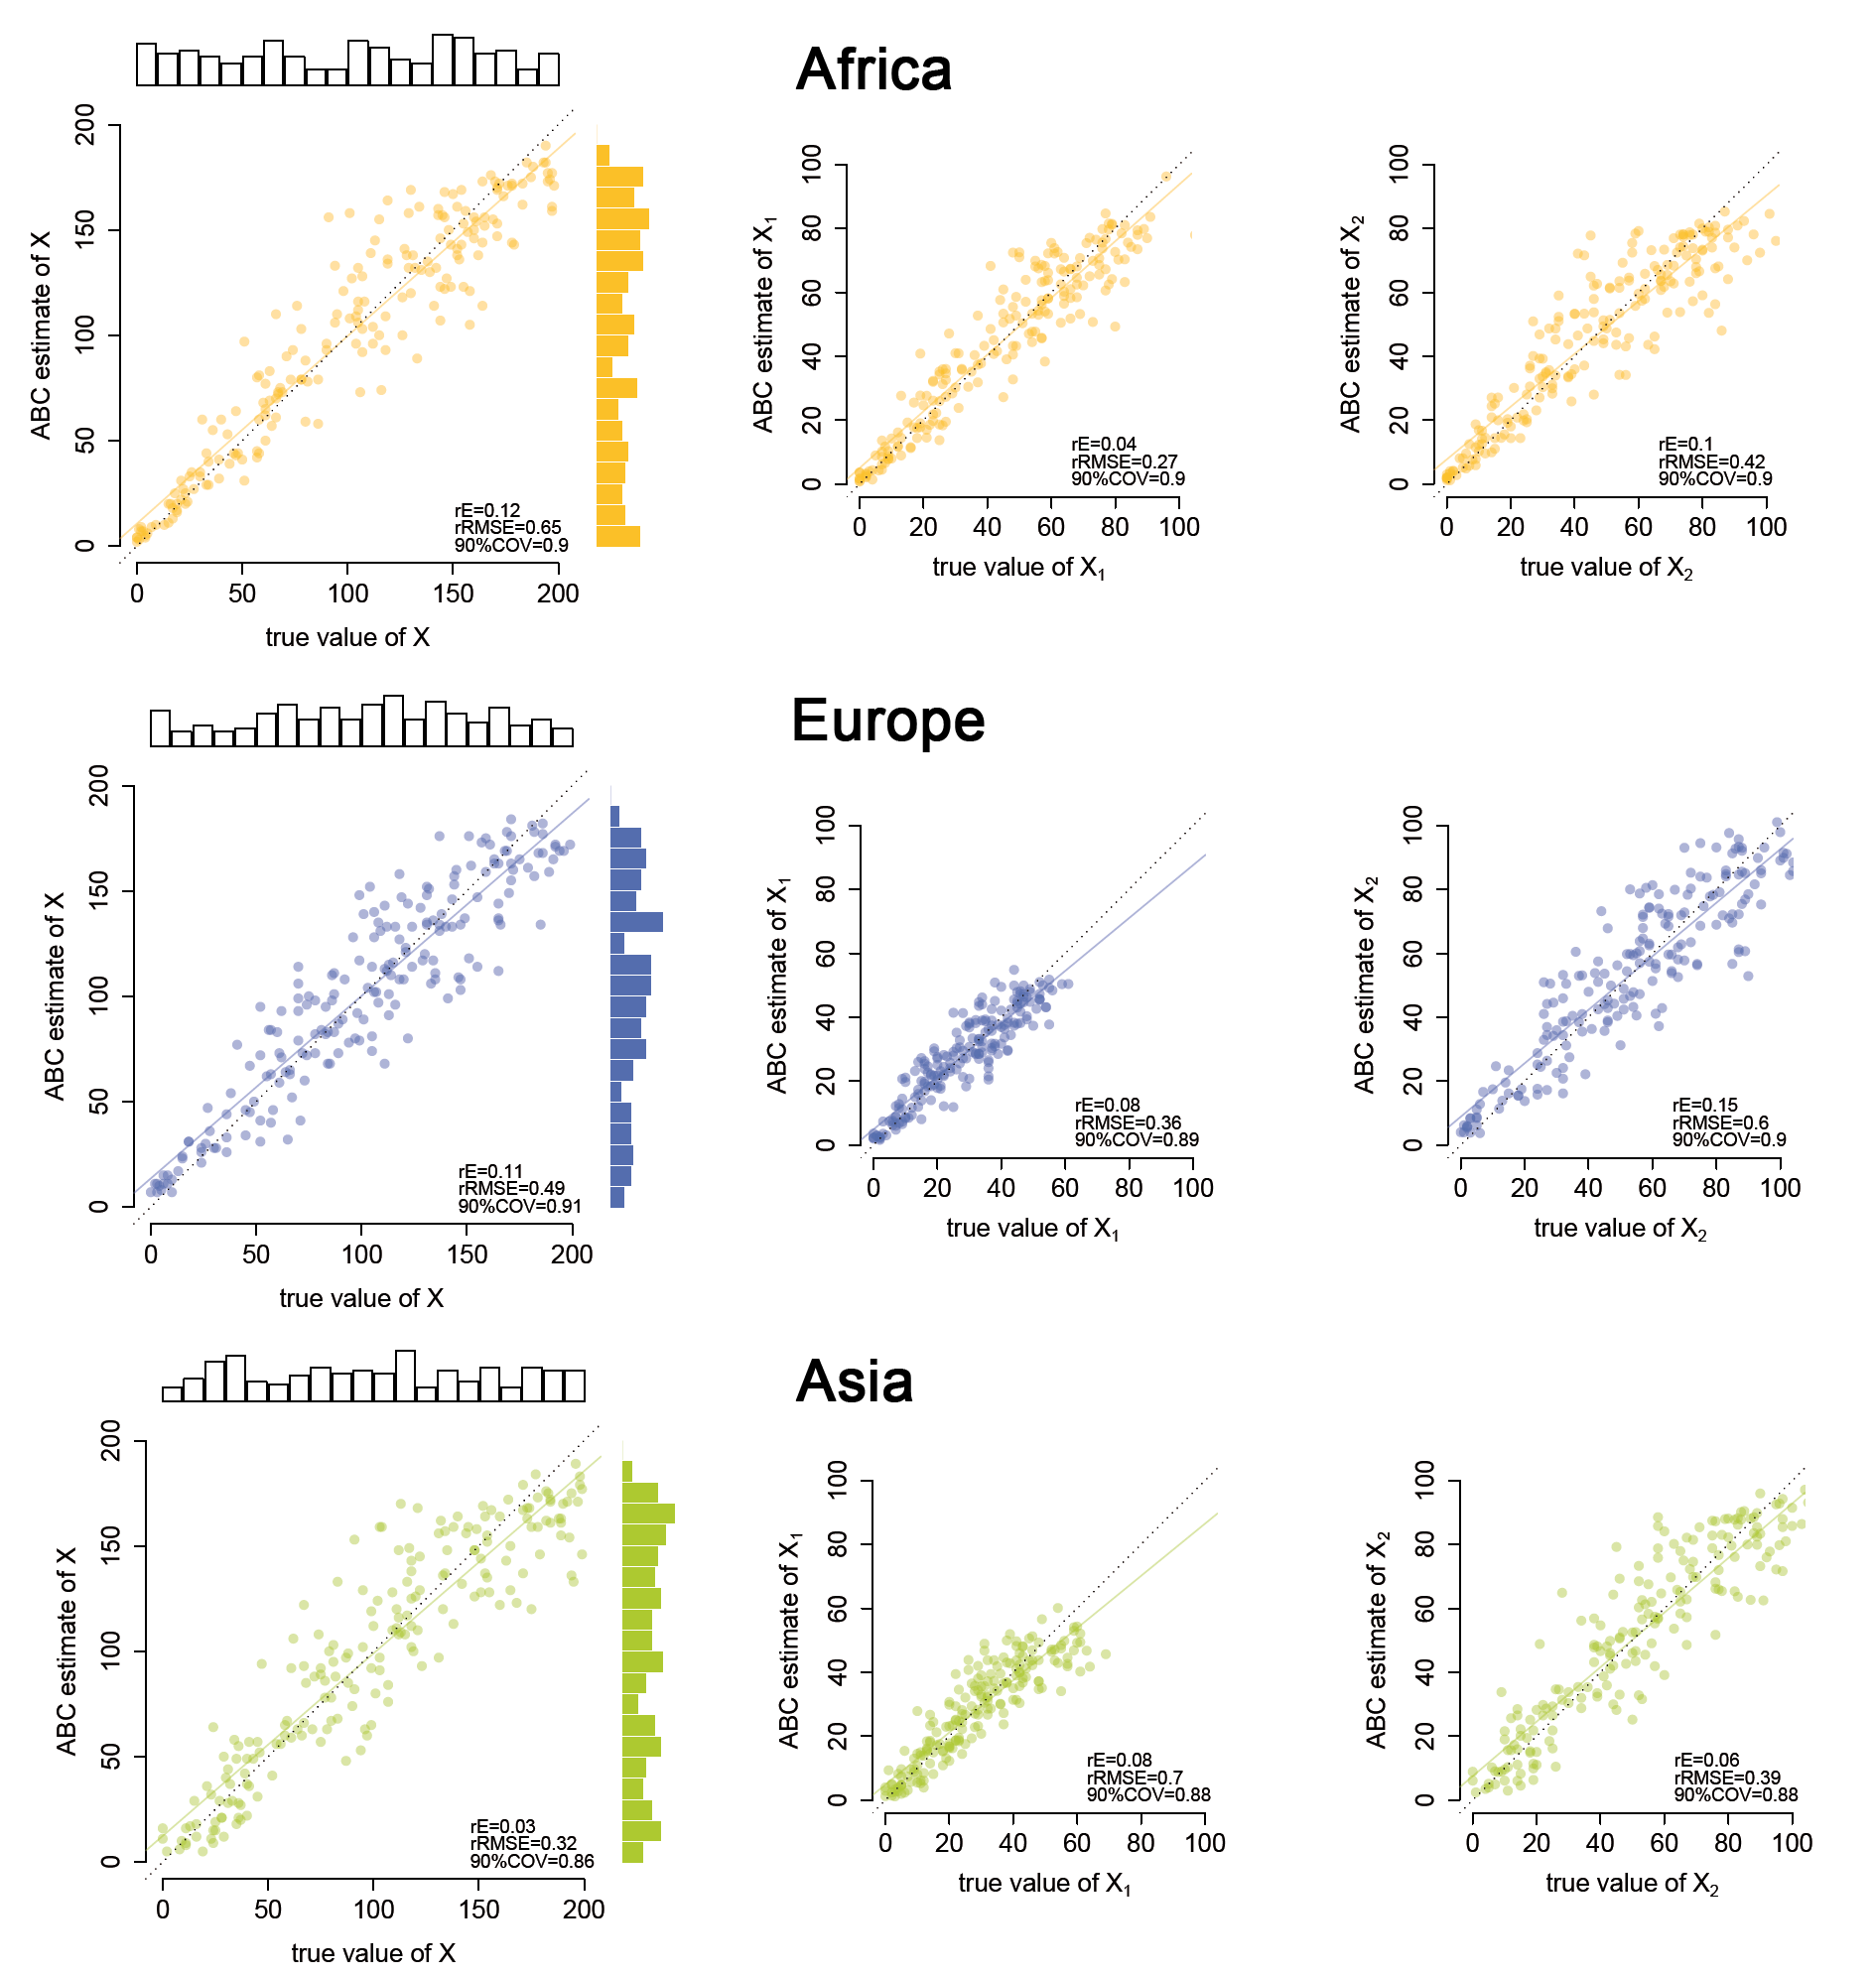


**Figure S4. Cross-validation of the estimations of *X* (incomplete sweep scenario)*.*** Accuracy of the ABC estimations evaluated assuming *X* incomplete sweeps and using 200 pseudo-empirical WGSs per population, randomly drawn and excluded from the 105 ABC simulations used to estimate the parameters (ABC simulations are those used in Figure 3A). The external bar plots show the prior distributions of the true values (top bars) and the distributions of the ABC estimates (colored bars on the right). Simplified plots for *X*1 and *X*2 are indicated (*X*3 was omitted because it can be deduced from the relation, ). Colored lines show the regression lines between true and estimated values. Averaged relative errors (rE), rMSE and the 90%*COV* (i.e., the proportion of true values within the 90% credible interval of estimates, Materials and Methods) are also indicated.


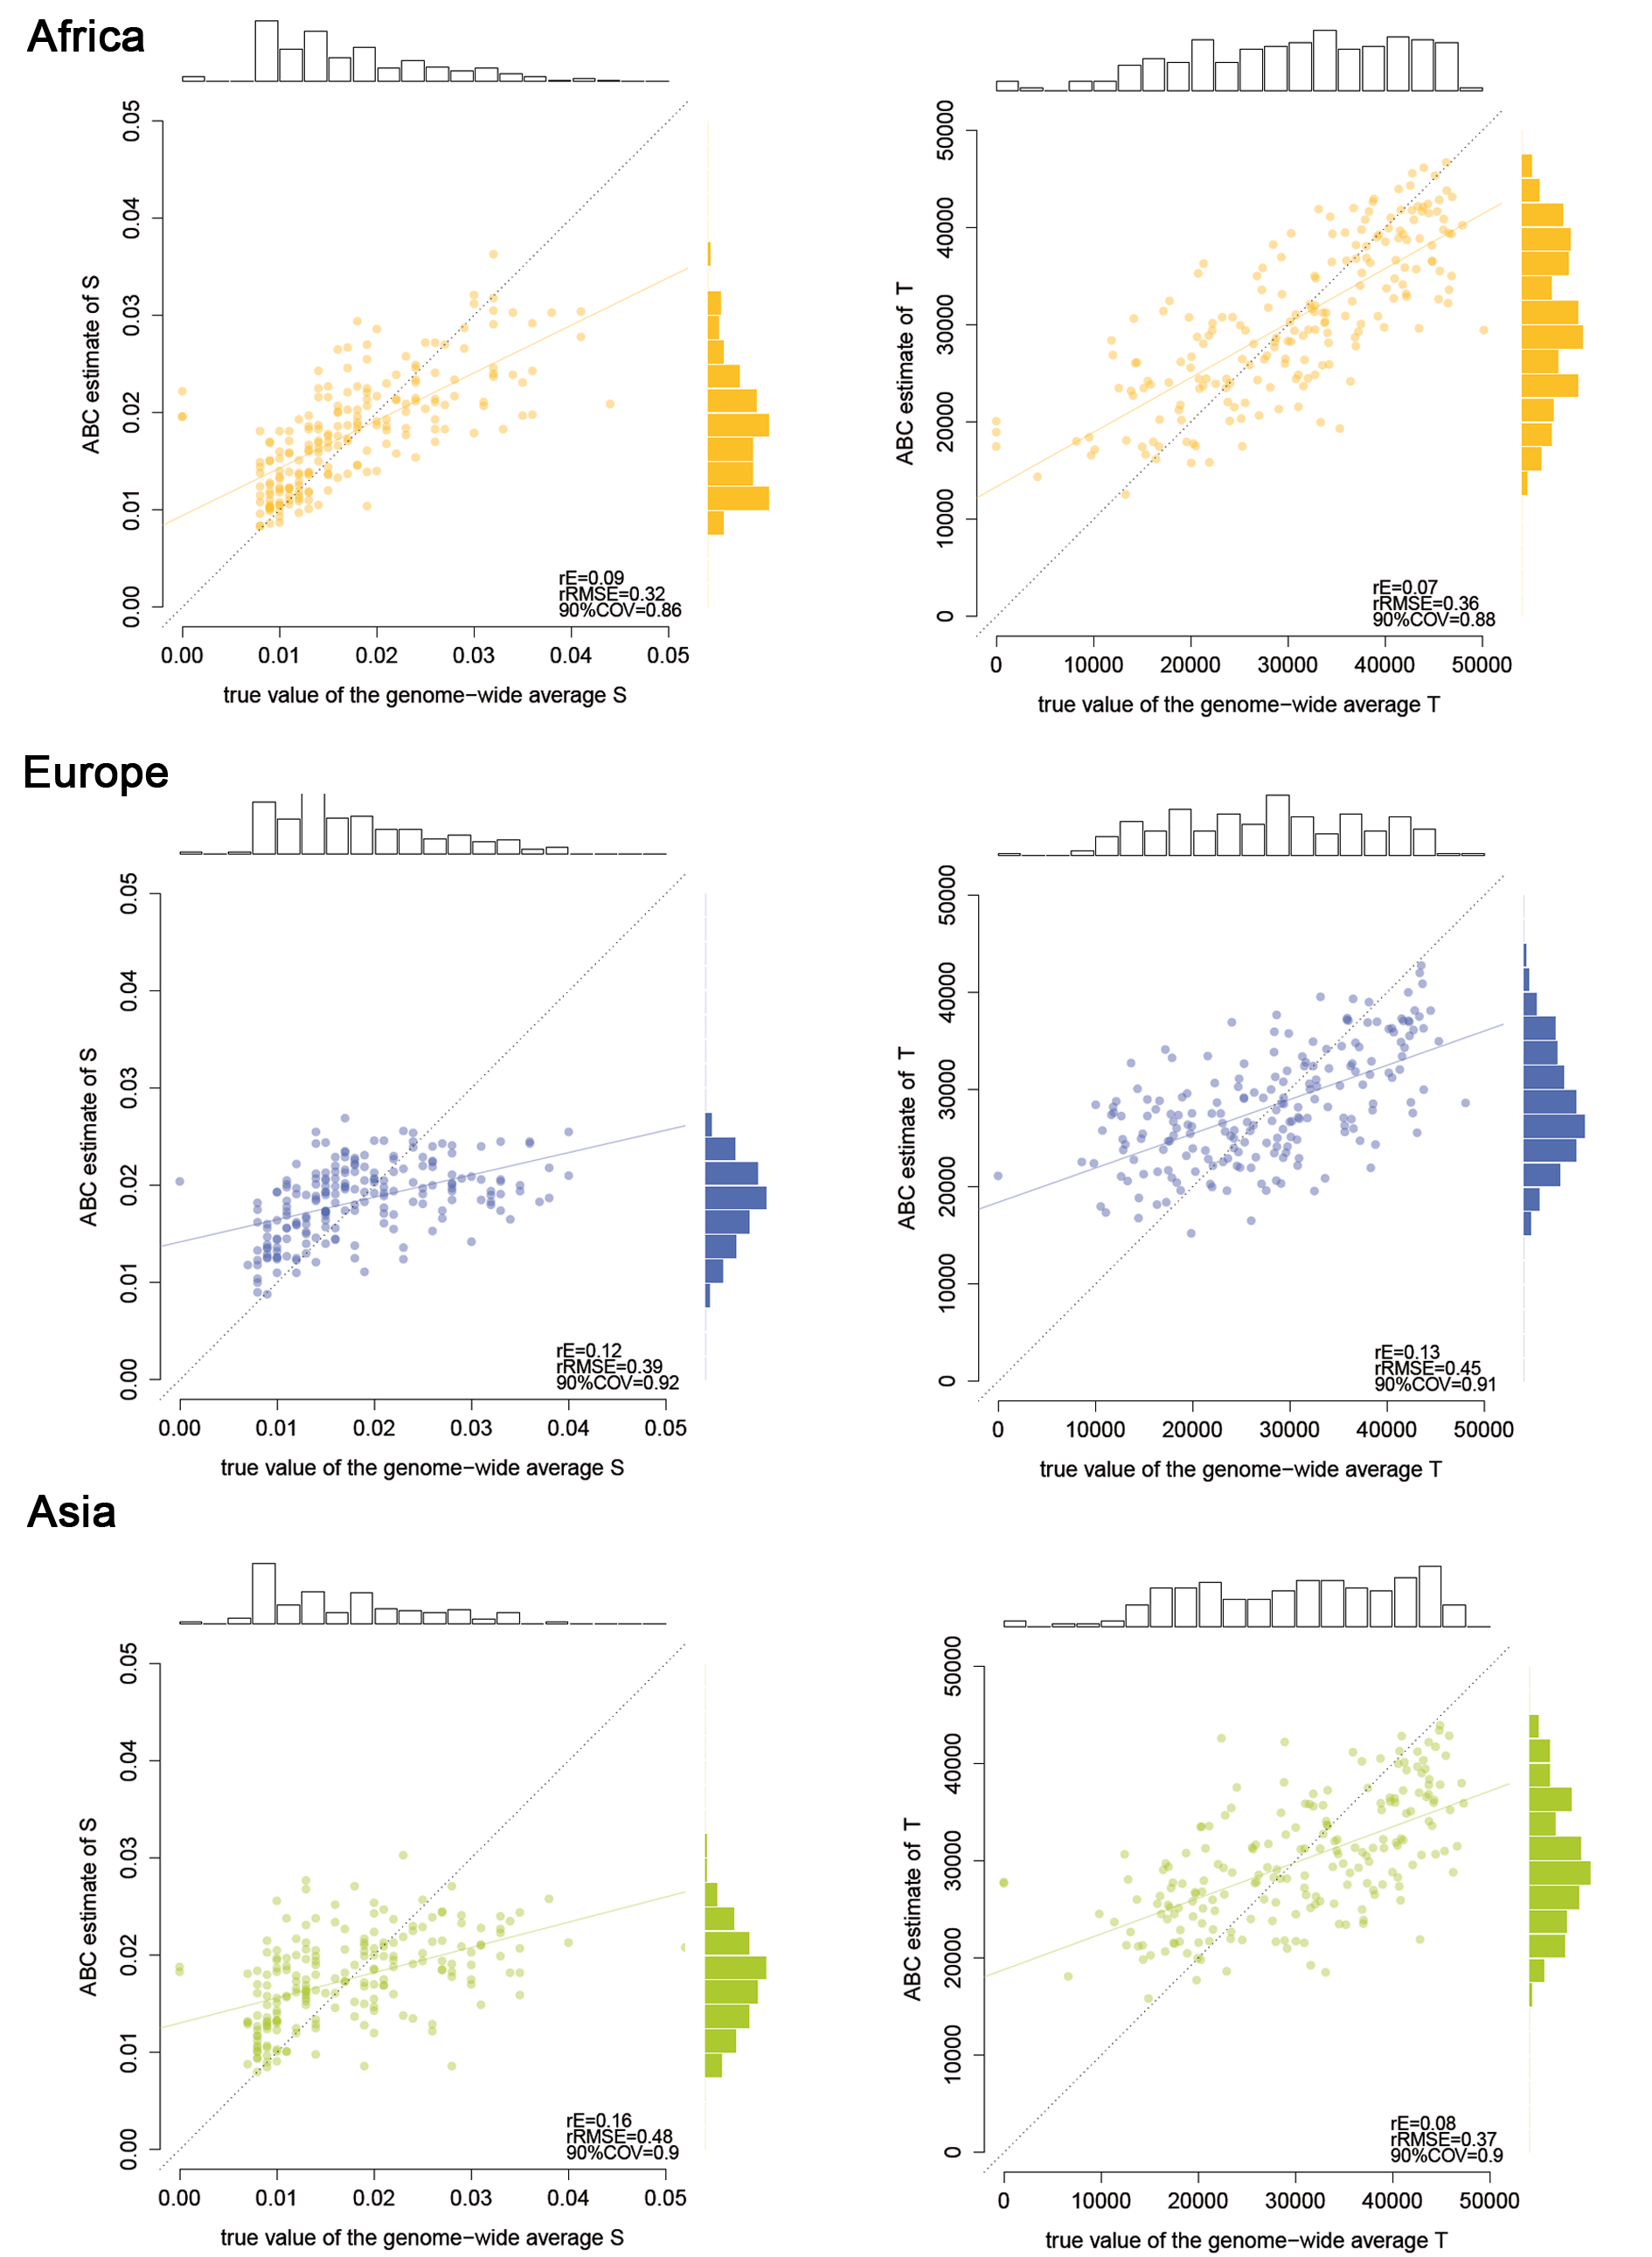


**Figure S5. Cross-validation of the estimations of *S* and *T* (incomplete sweep scenario).** See the legend of Figure S4.


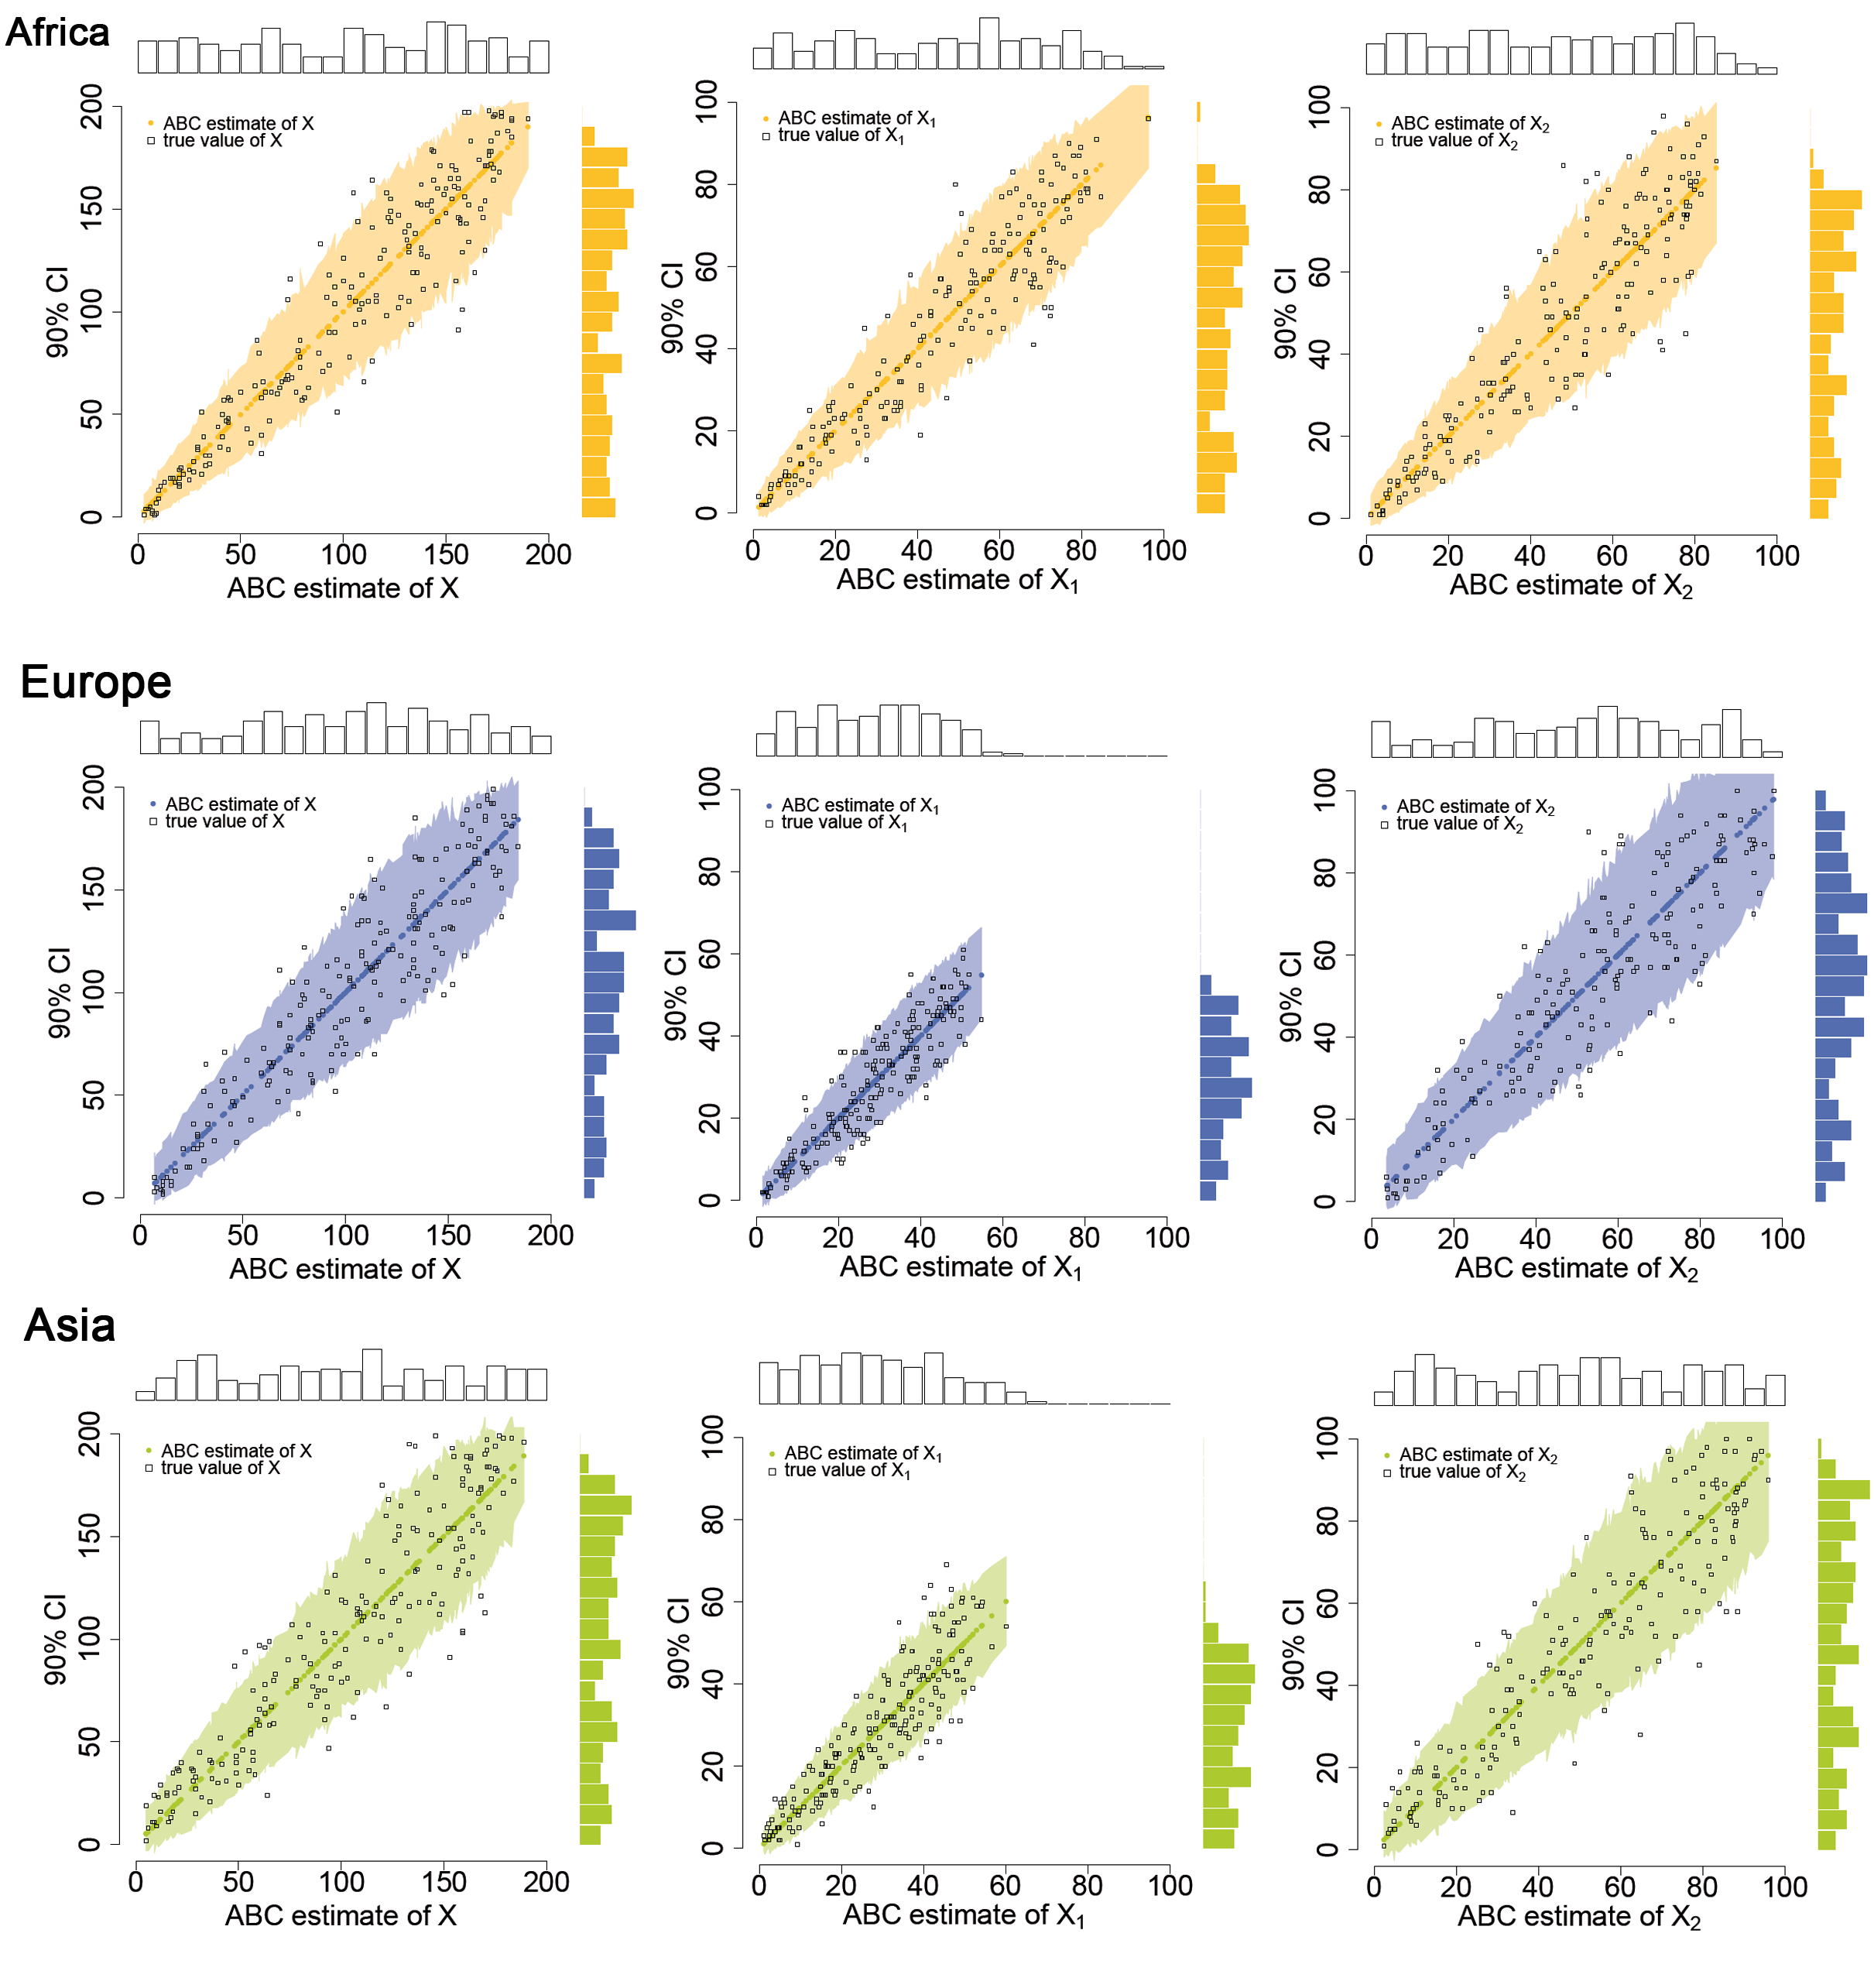


**Figure S6. Credible intervals of the estimations of *X* (incomplete sweep scenario).** Range of the 90% CIs of *X* (credible intervals, y-axis) plotted against the ABC estimations (ranked in ascendant order, *x*-axis). The ABC estimates are those shown in Figure S4. The external bar plots show the distributions of the true (top bars) and estimated (colored bars on the right) values.


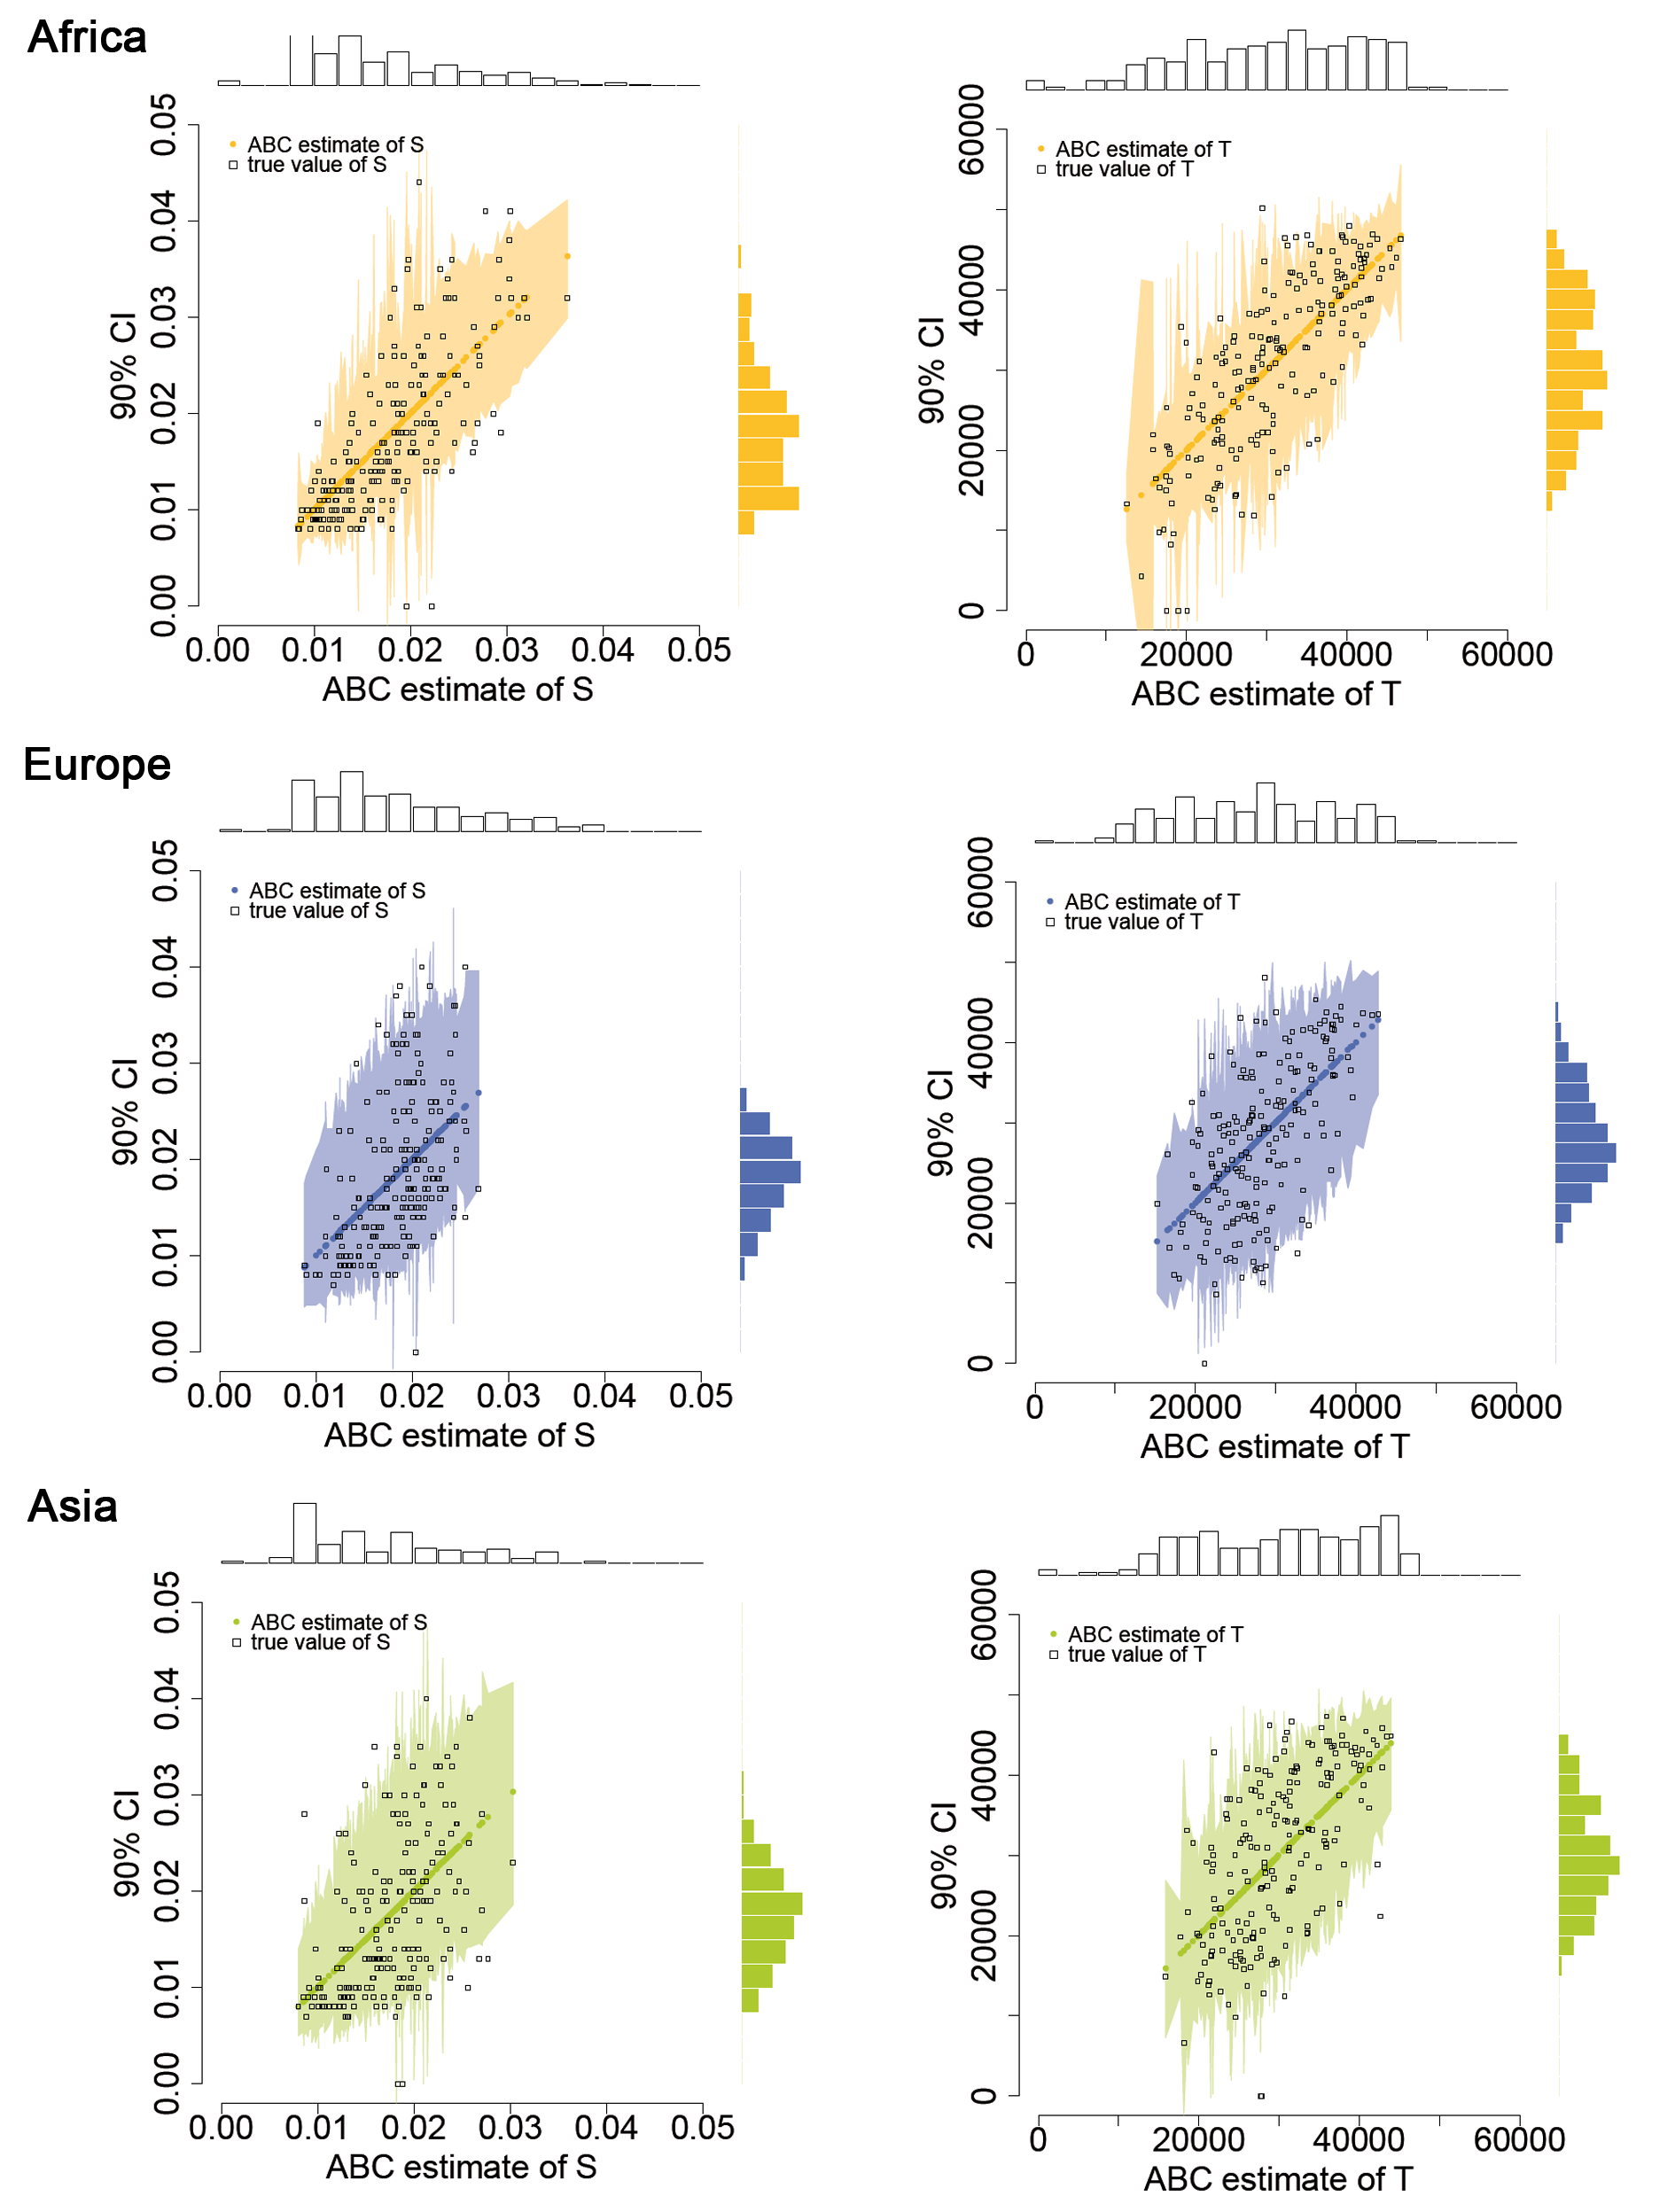


**Figure S7. Credible intervals of the estimations of *S* and *T* (incomplete sweep scenario).** The ABC estimates of *S* and *T* are those shown in Figure S5. See the legend of Figure S6.


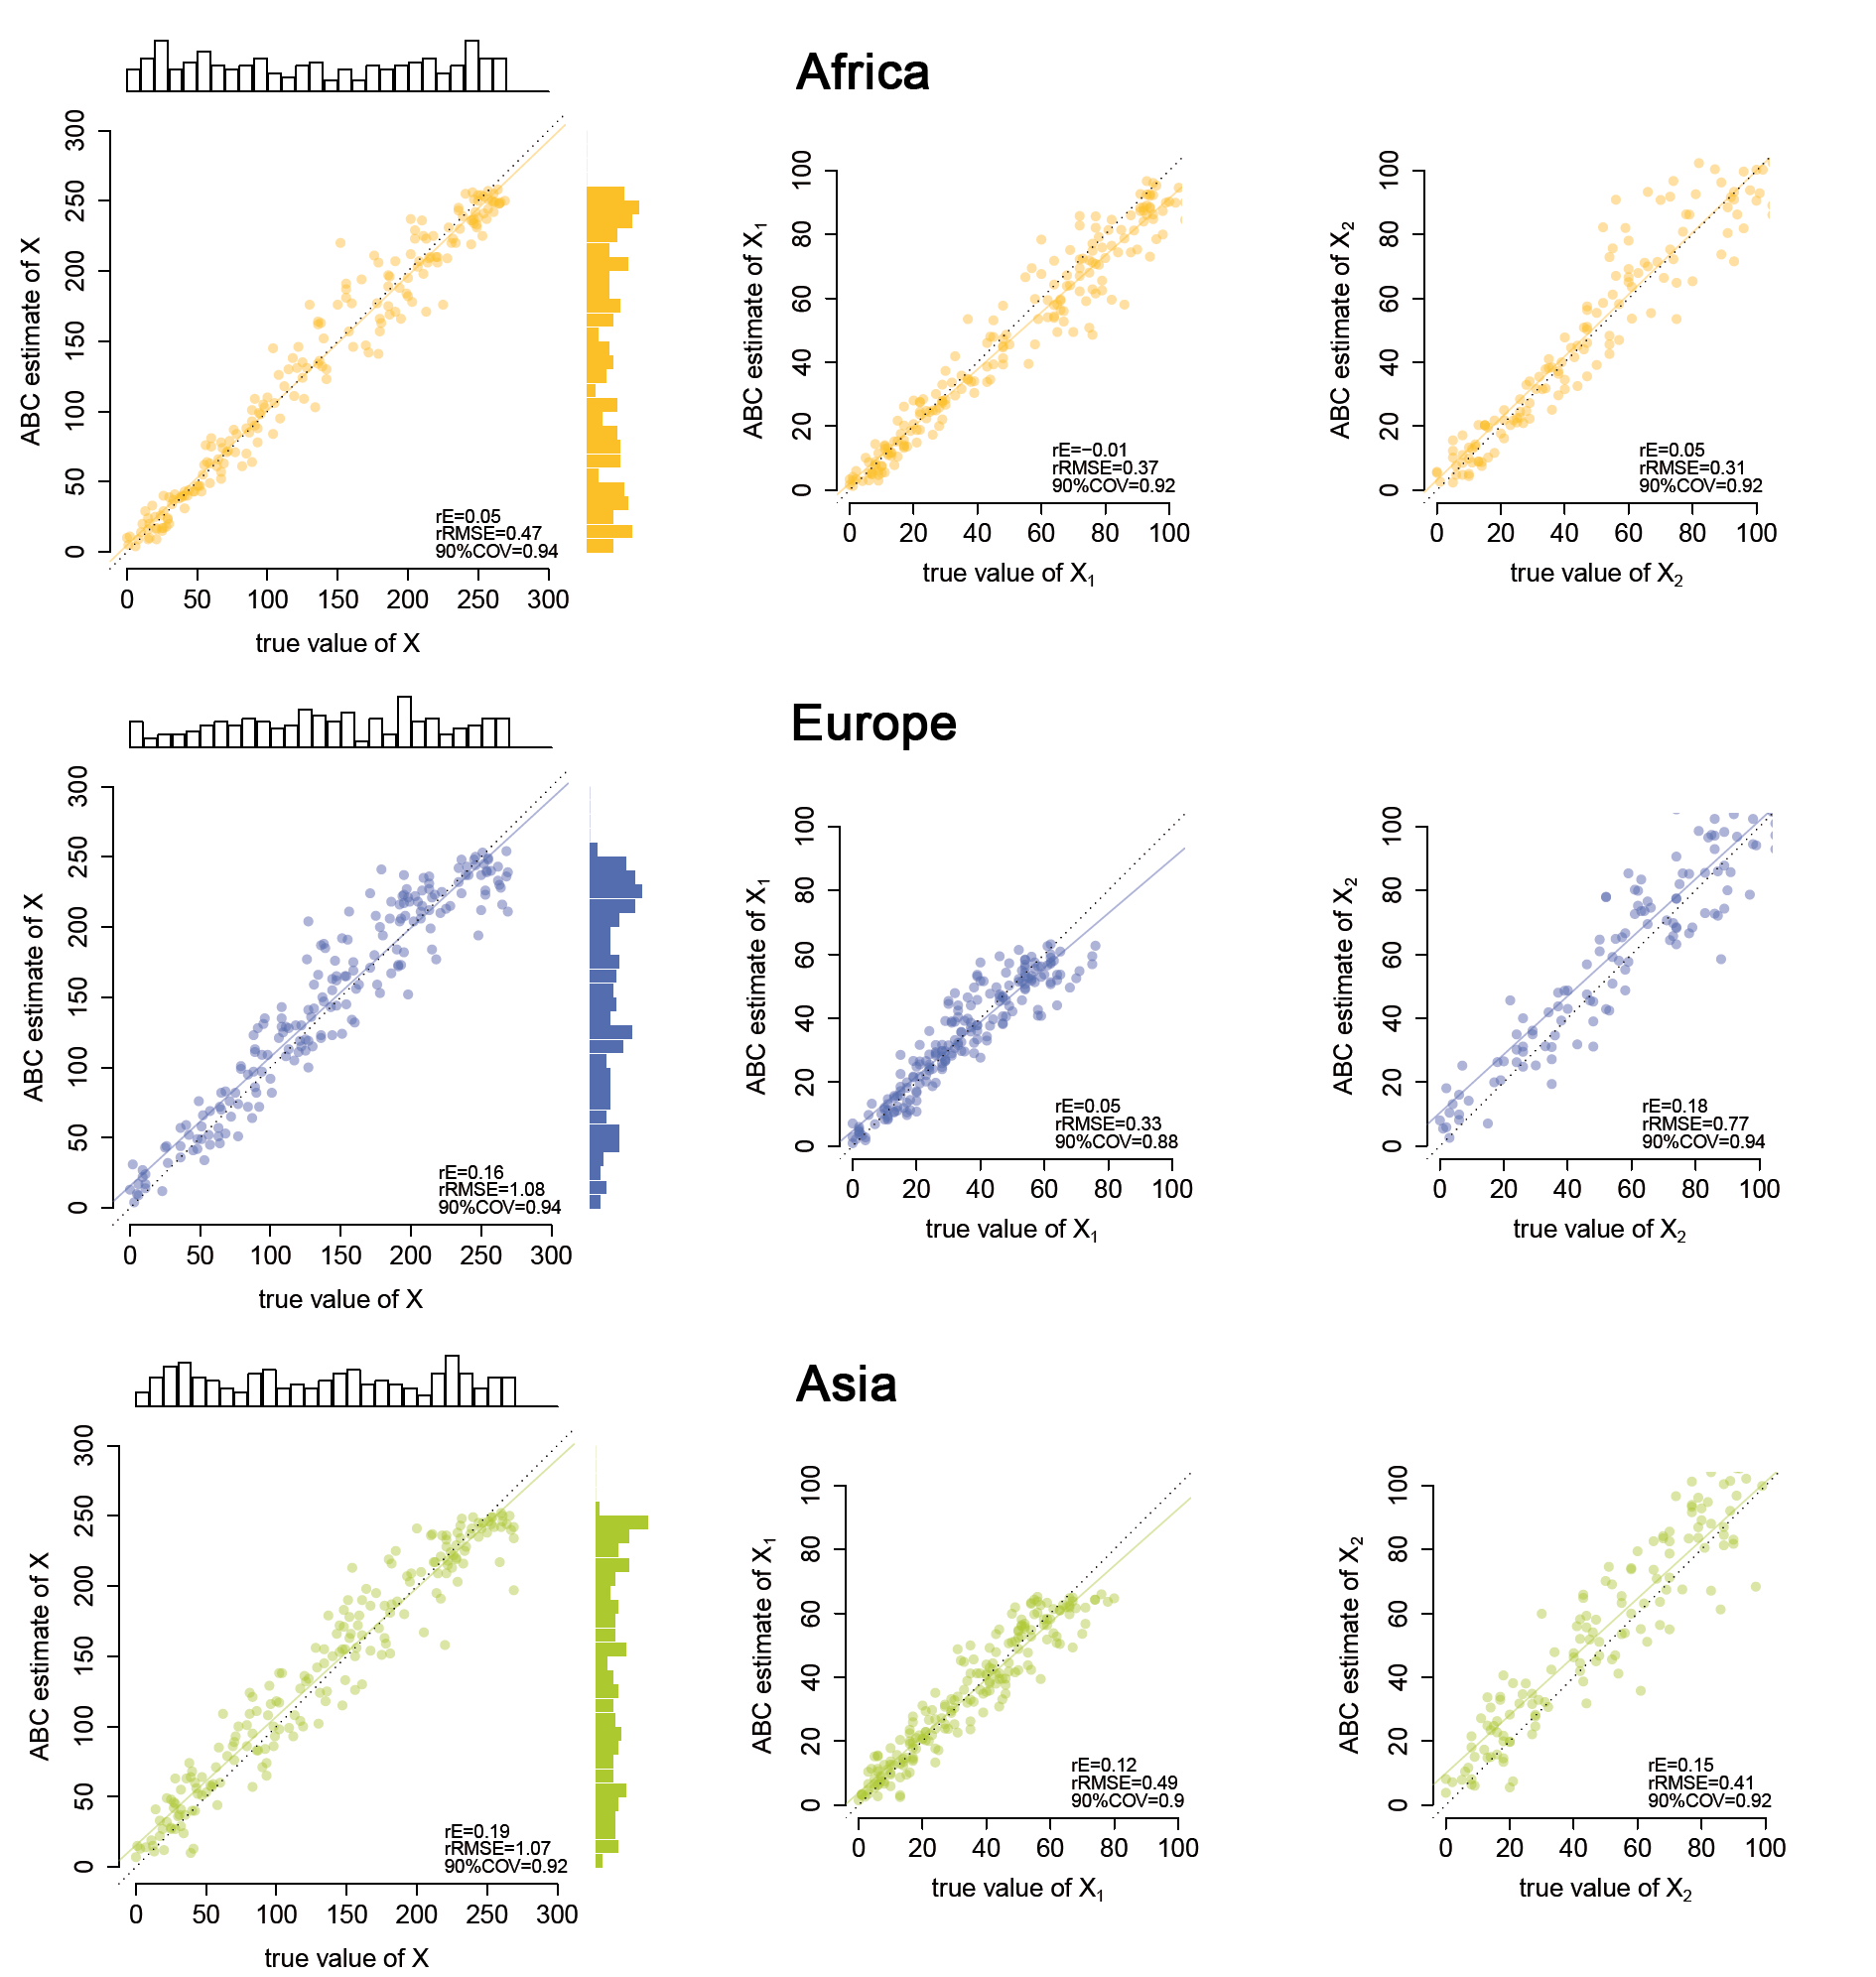


**Figure S8. Cross-validation of the estimations of *X* (sweep scenario).** Accuracy of the ABC estimations of *X* sweeps, either complete or incomplete, and using 200 pseudo-empirical WGSs per population, randomly drawn and excluded from the 105 ABC simulations used to estimate the parameters (ABC simulations are those used in Figure 3B). See the legend of Figure S4.


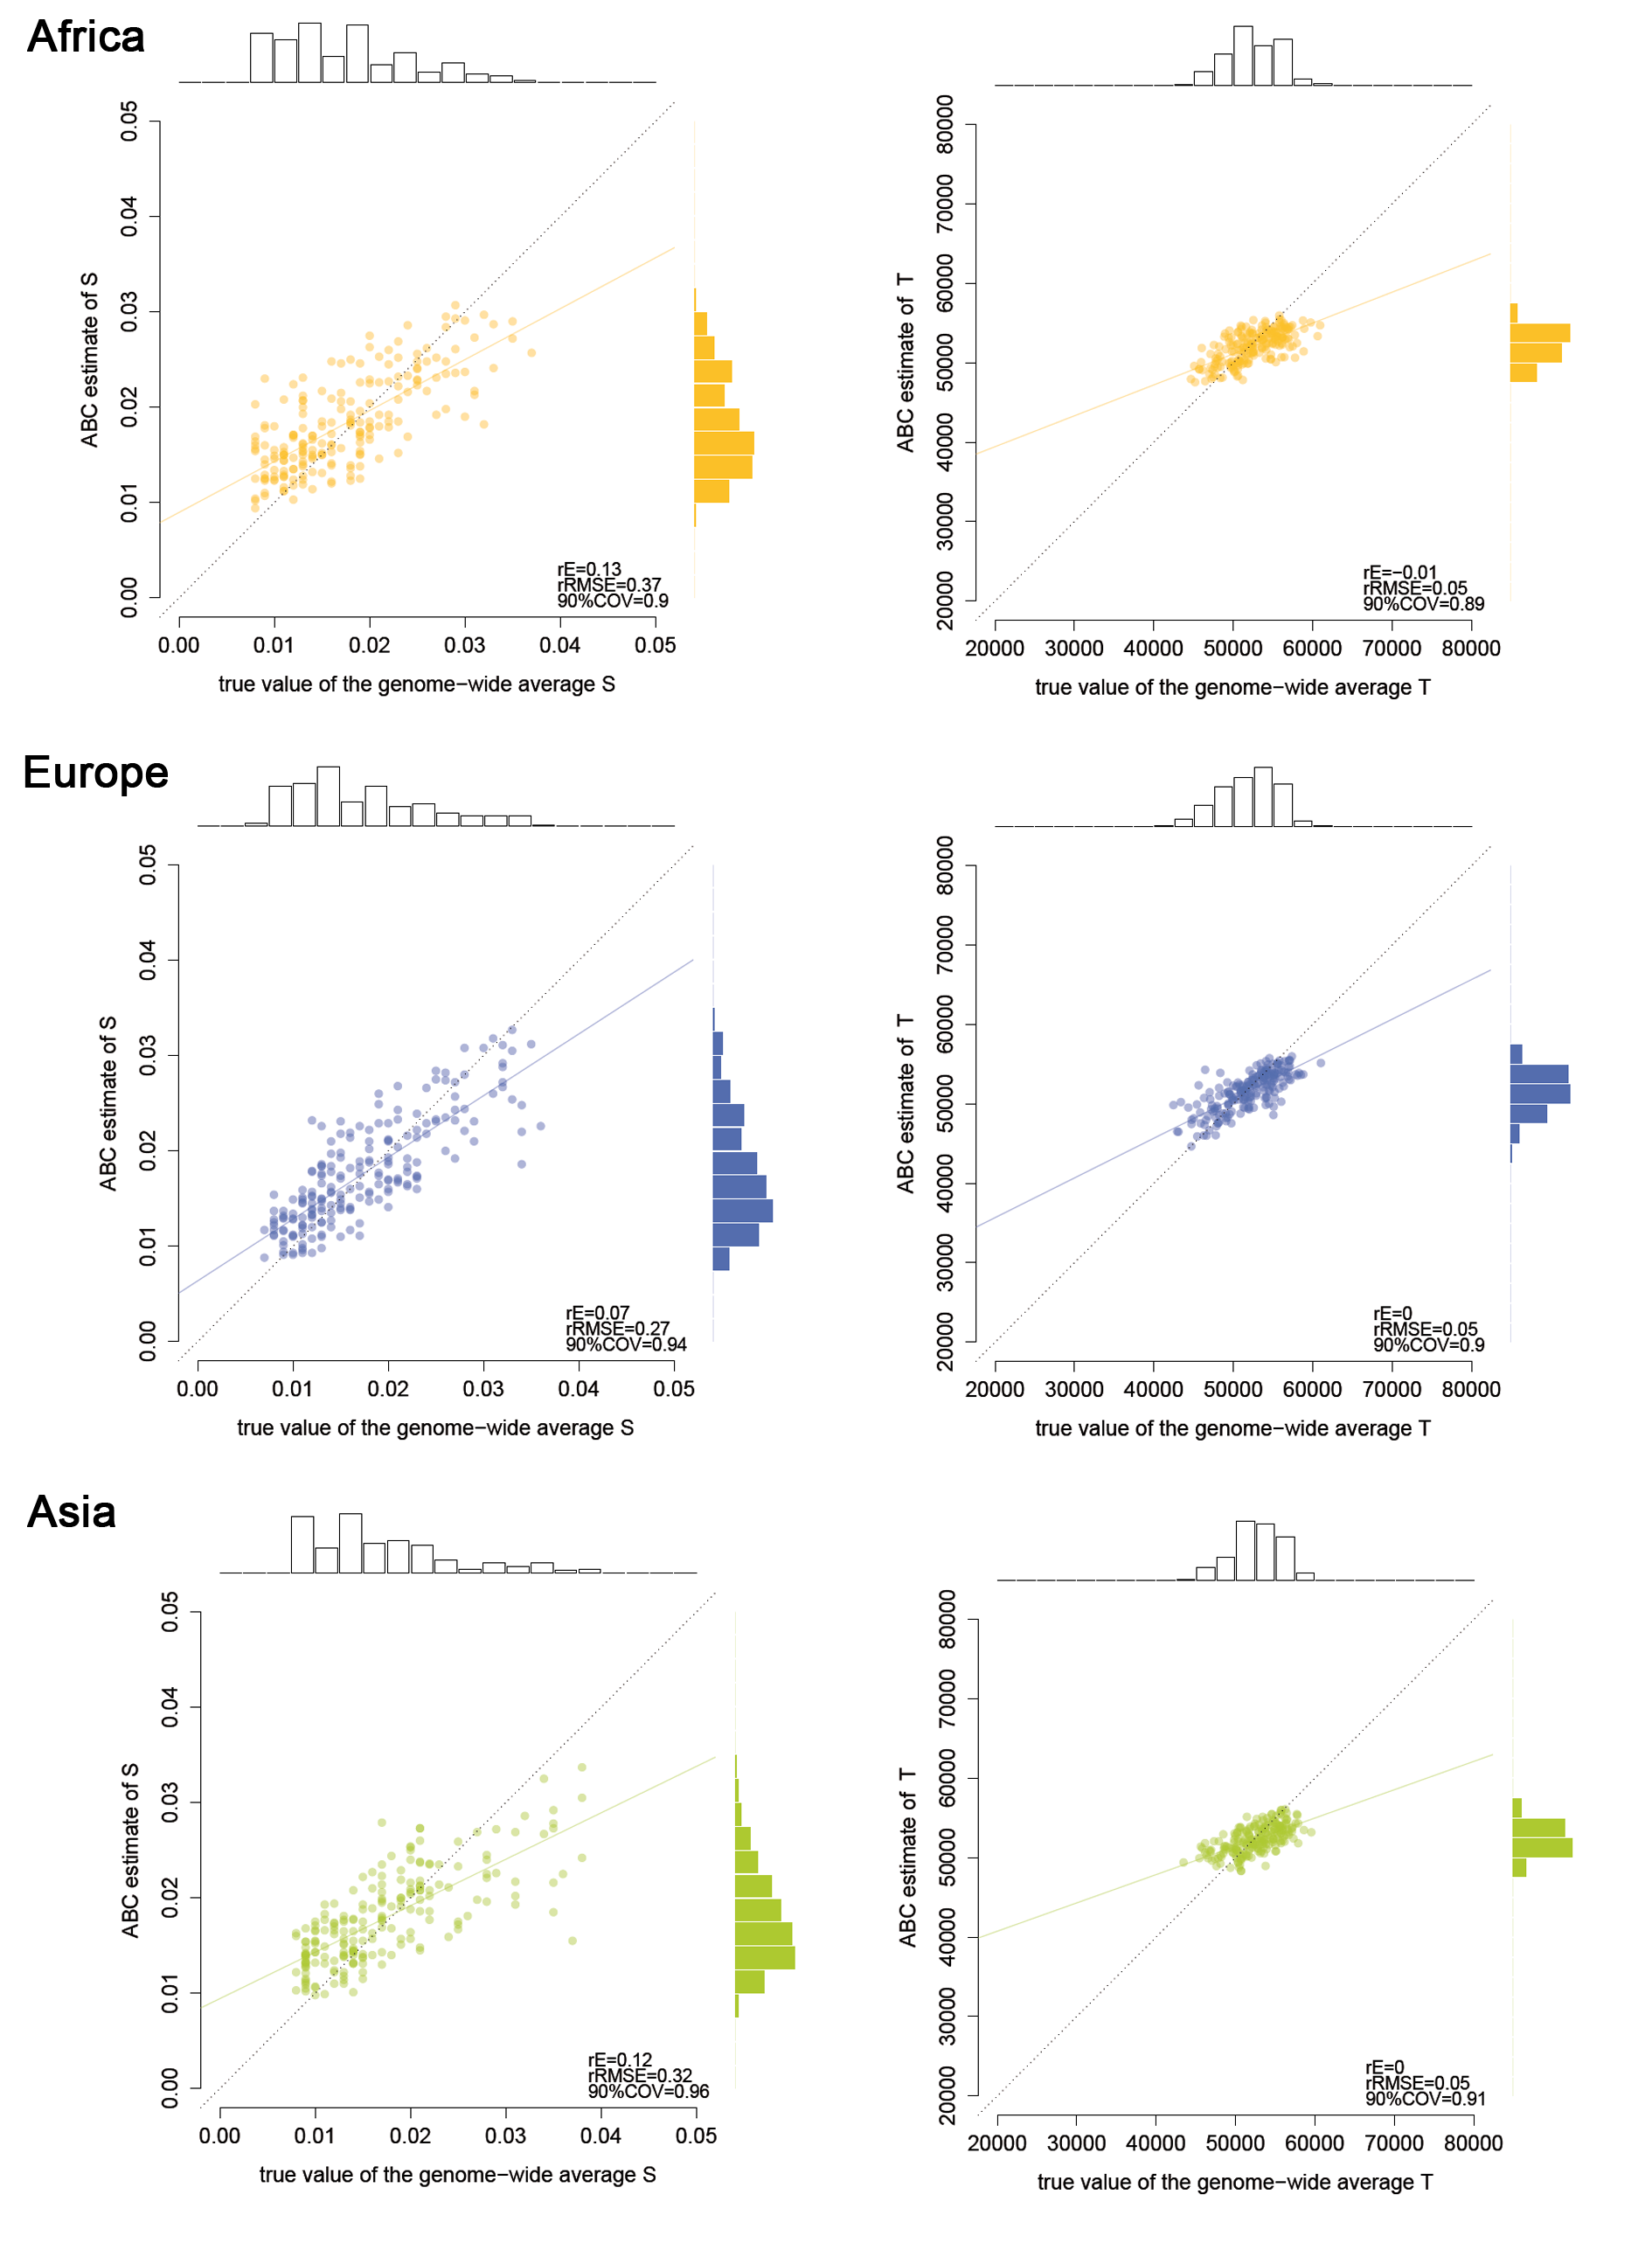


**Figure S9. Cross-validation of the estimations of *S* and *T* (sweep scenario).** See the legend of Figures S4,8.


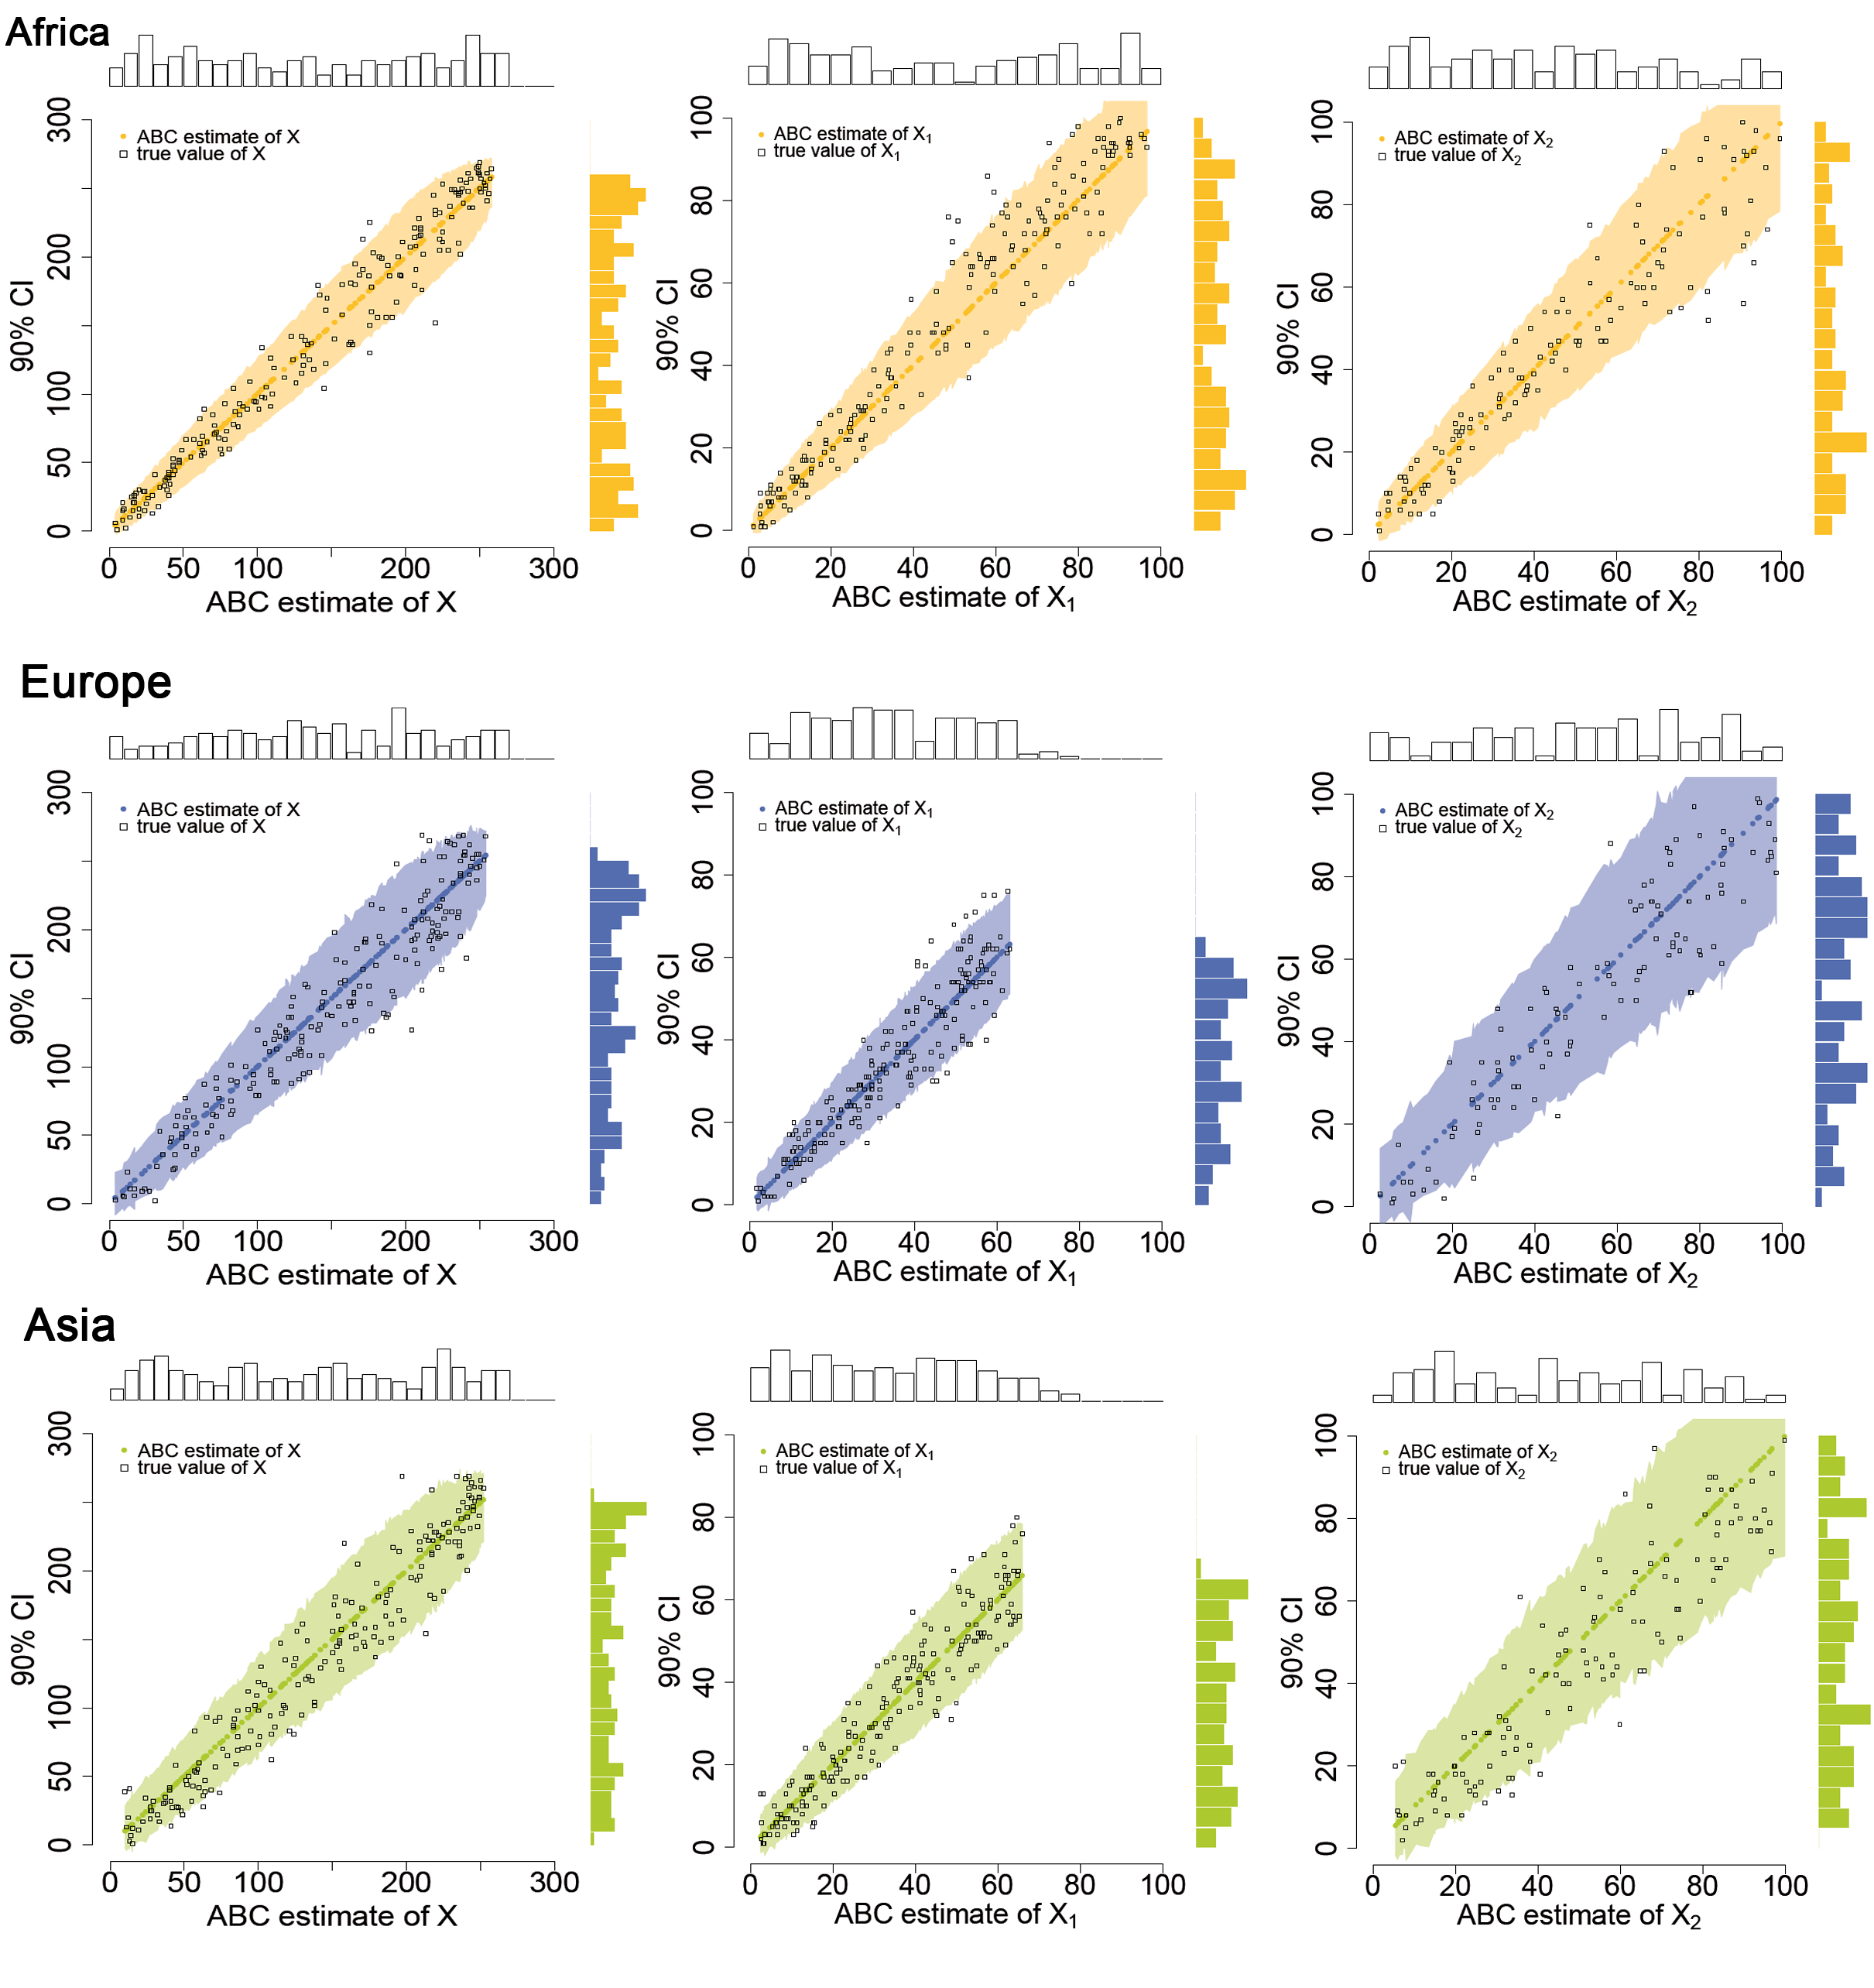


**Figure S10. Credible intervals of the estimations of *X* (sweep scenario).** The ABC estimates are those shown in Figure S8. See the legend of Figure S6.


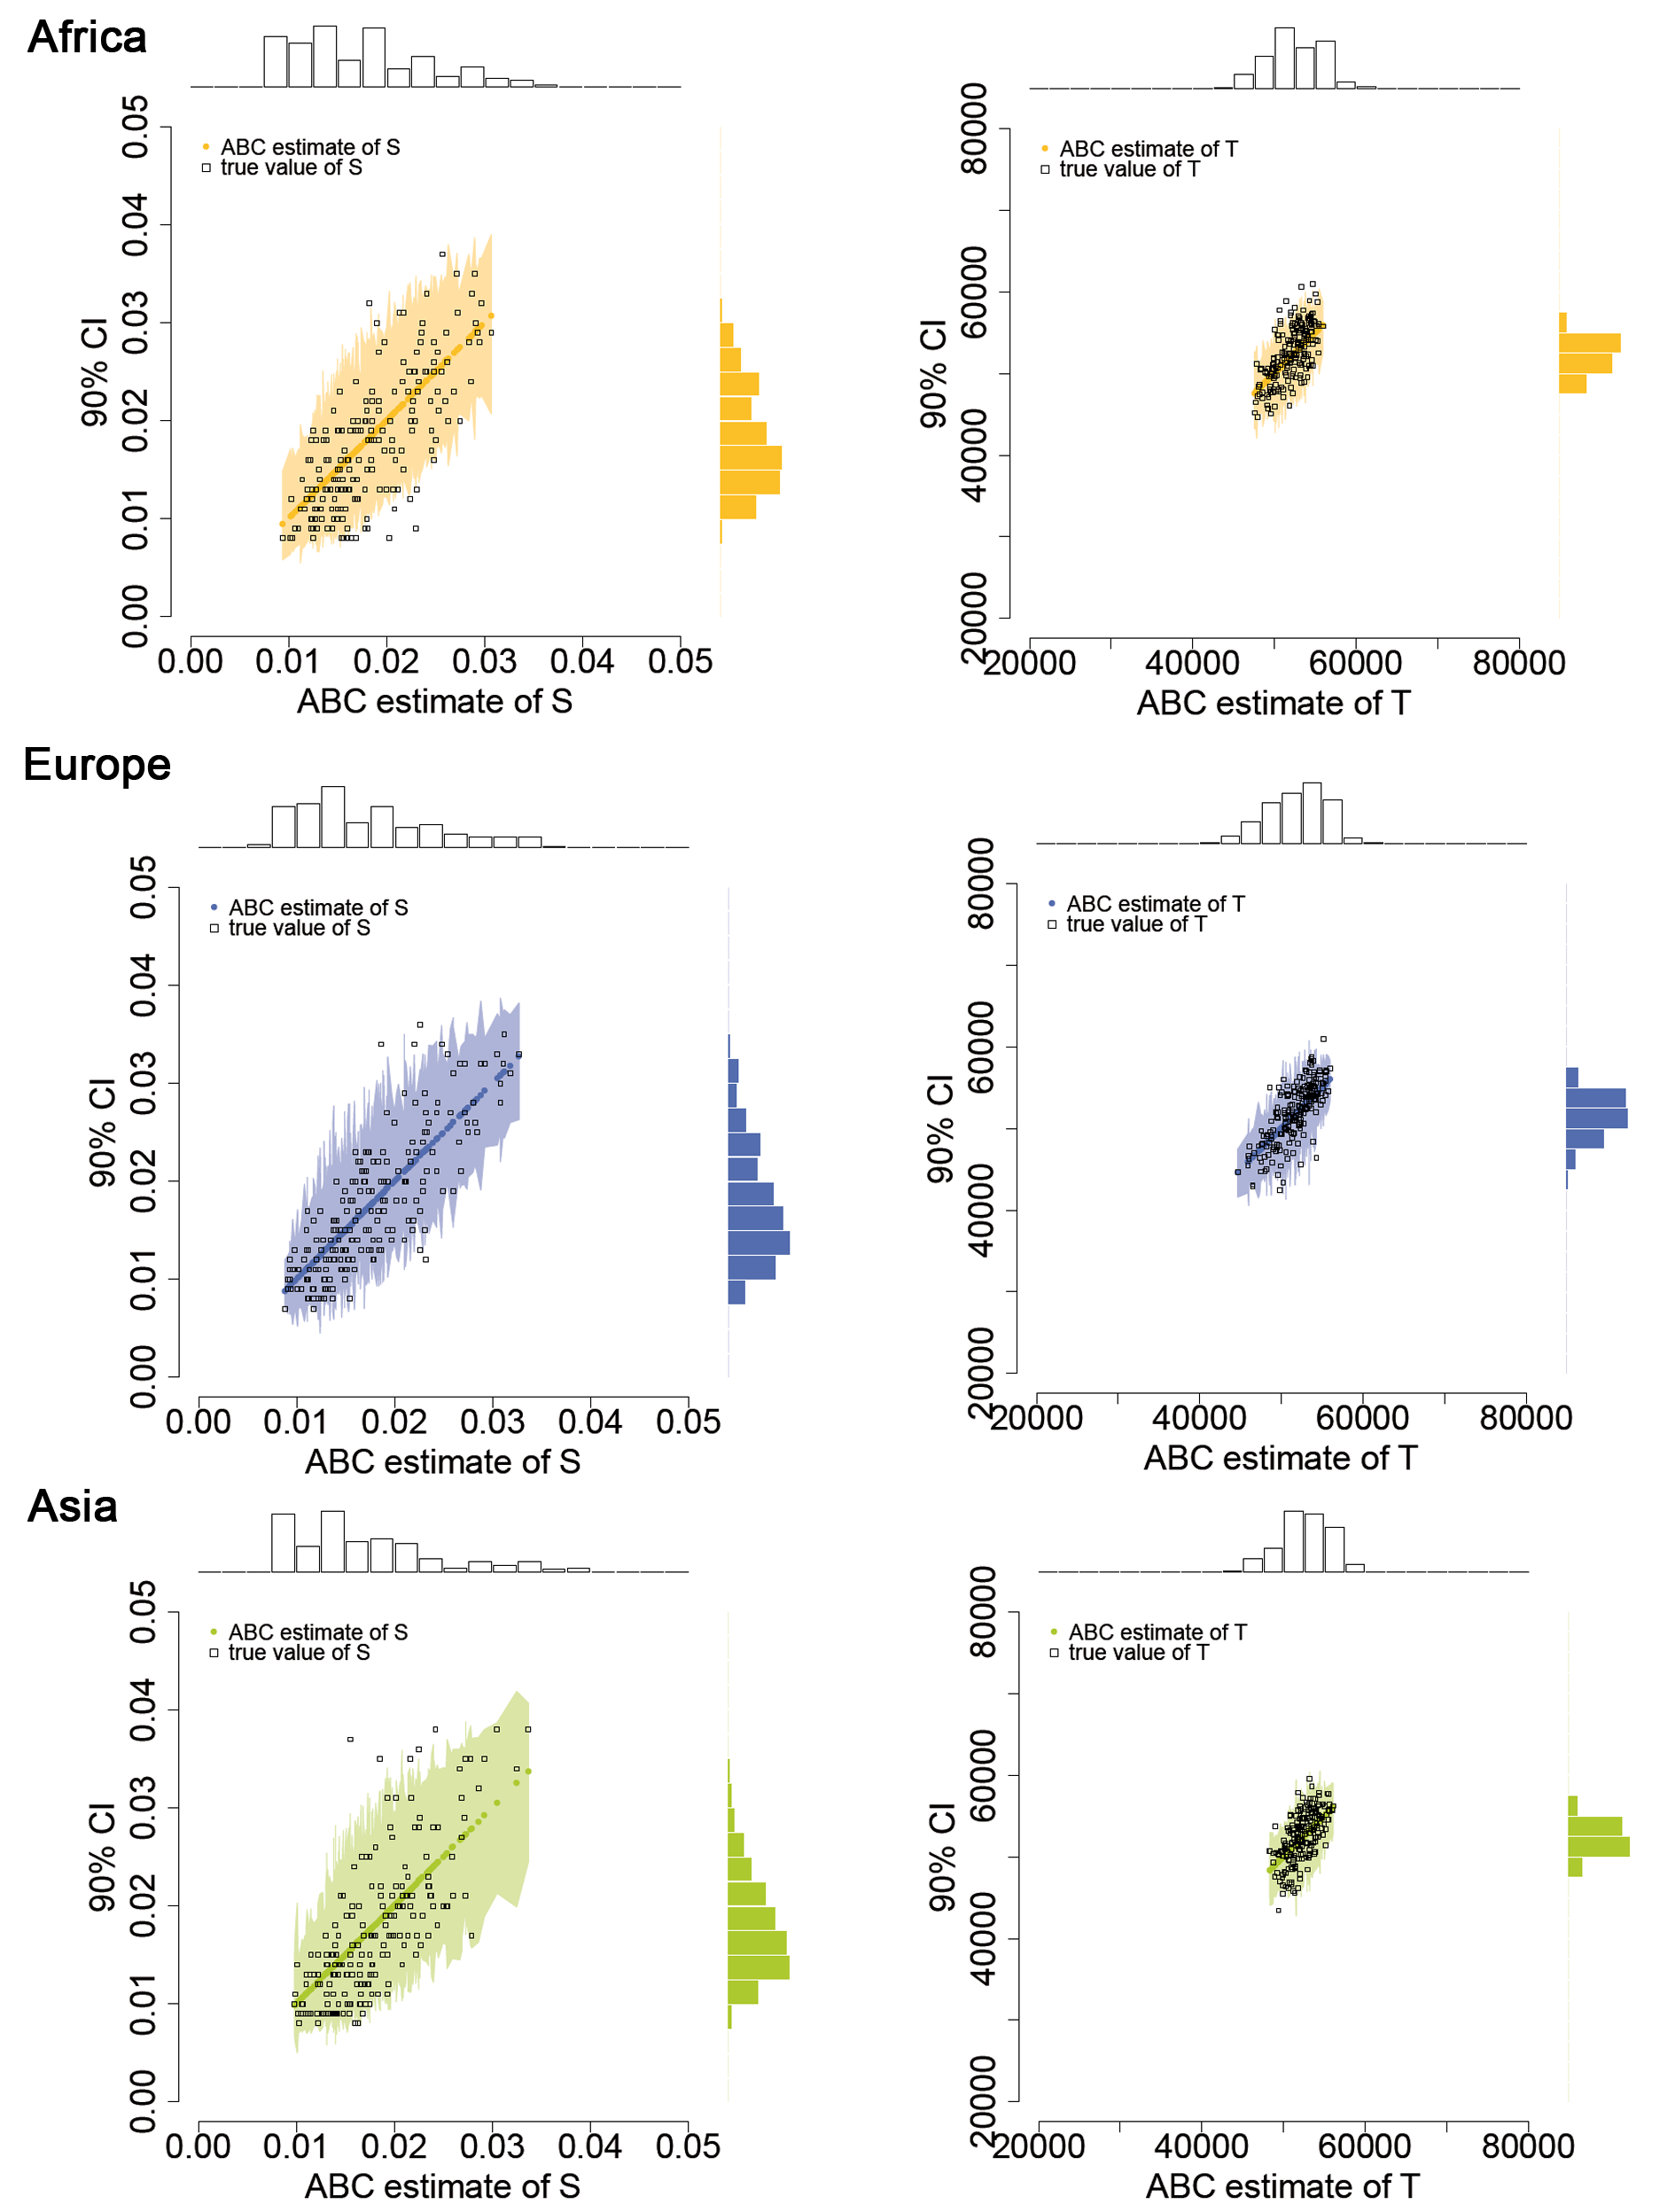


**Figure S11. Credible intervals of the estimations of *S* and *T* (sweep scenario).** The ABC estimates are those shown in Figure S9. See the legend of Figure S6.


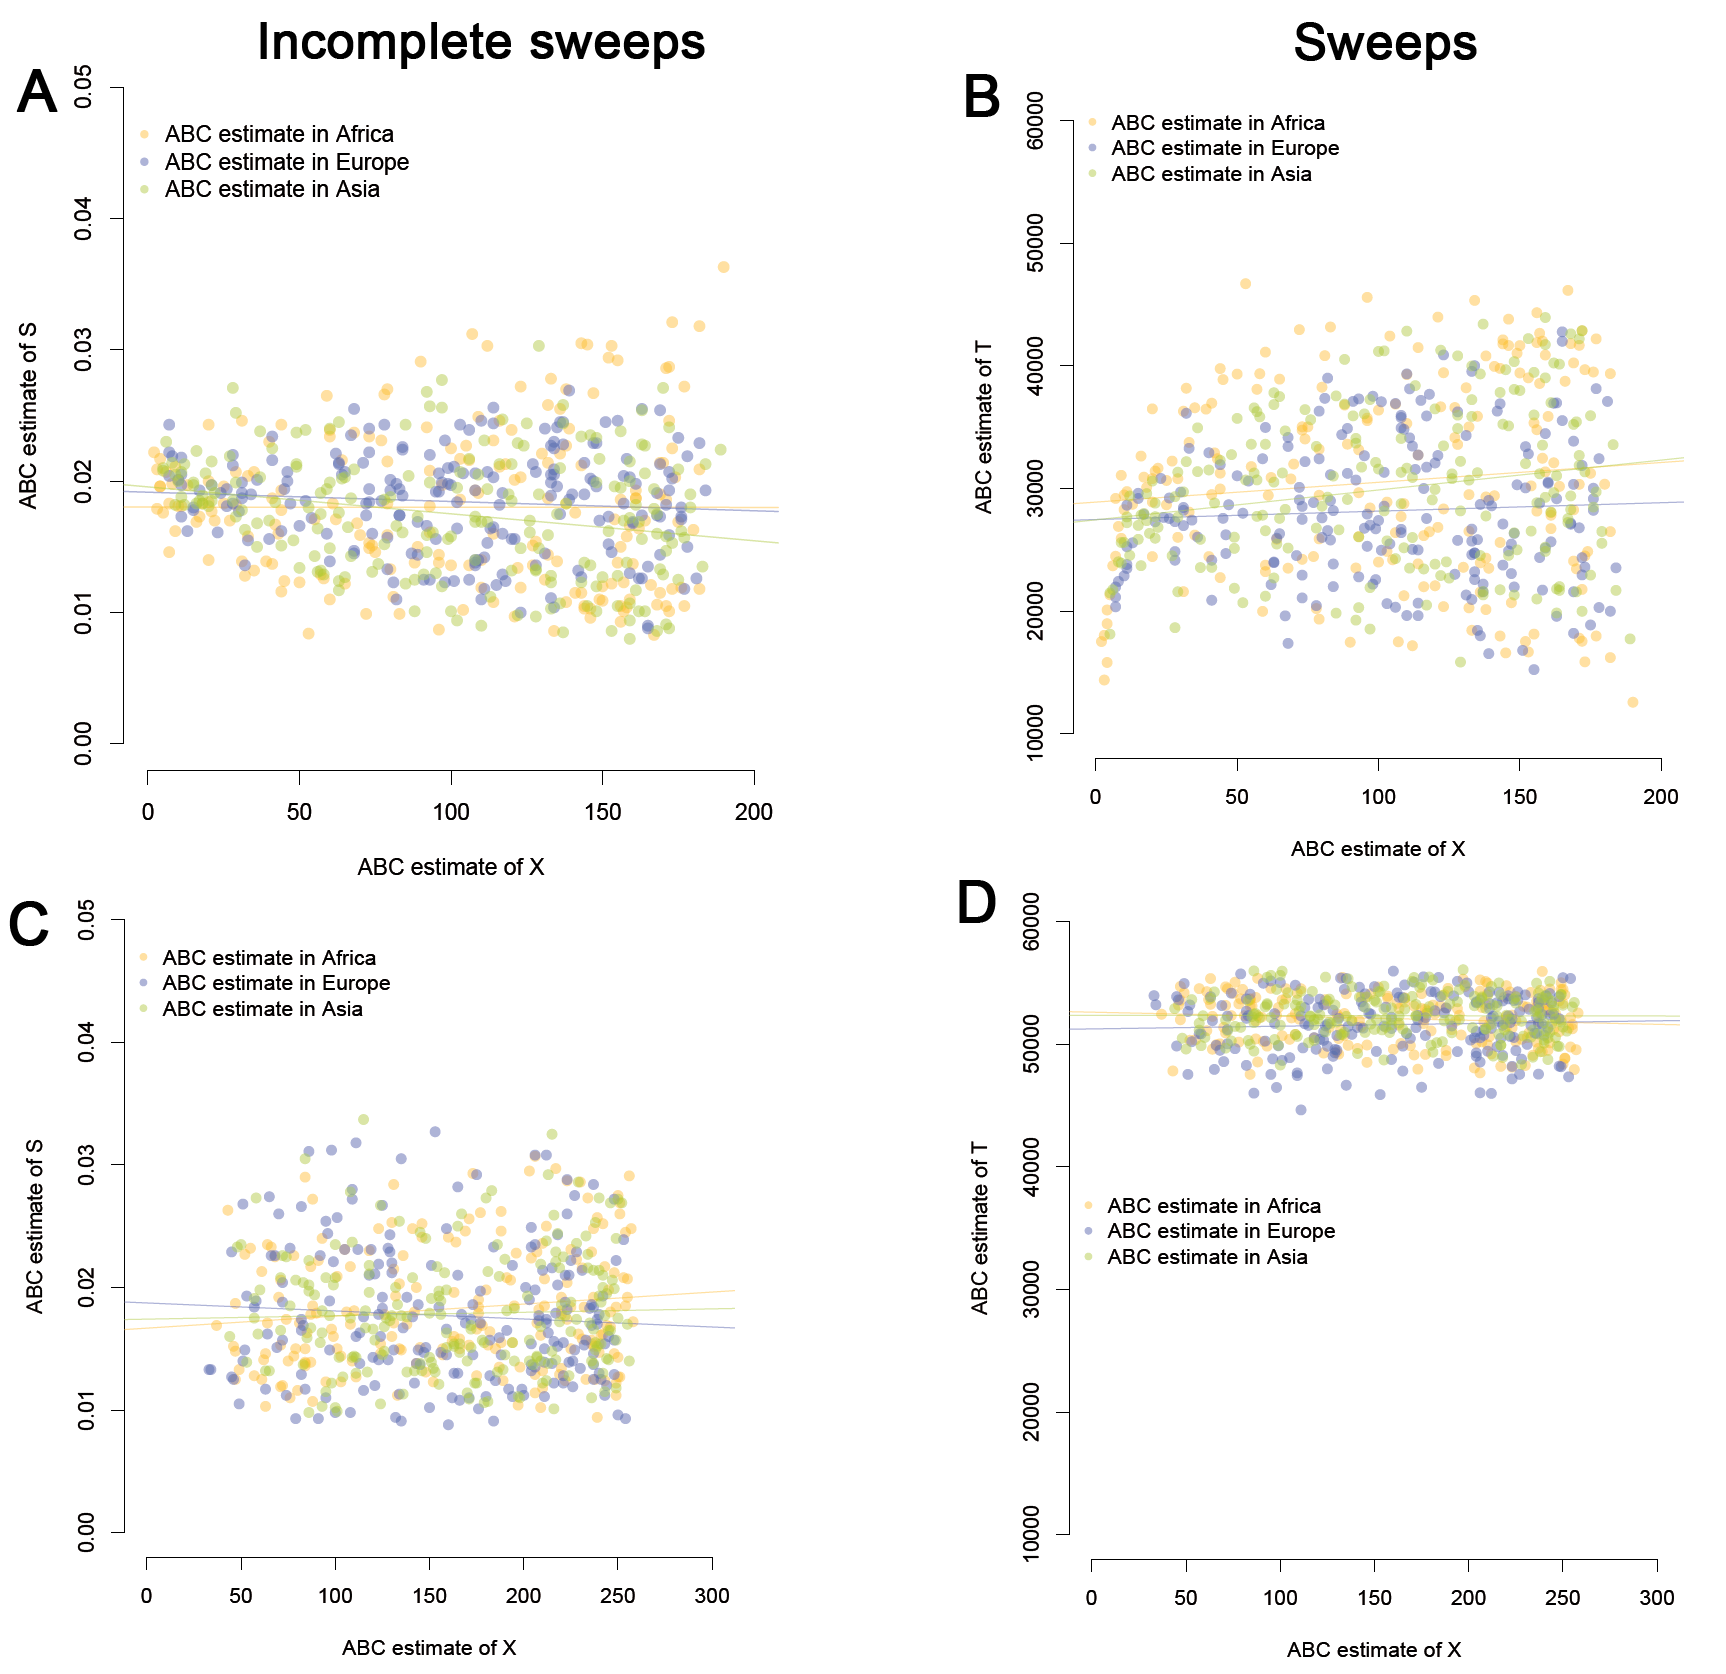


**Figure S12. Correlations between *X* and *S* or *T* estimated using pseudo-empirical data.** The ABC estimates are those shown in Figures S4 and S8 for *X* and in Figures S5 and S9 for *S* and *T*.


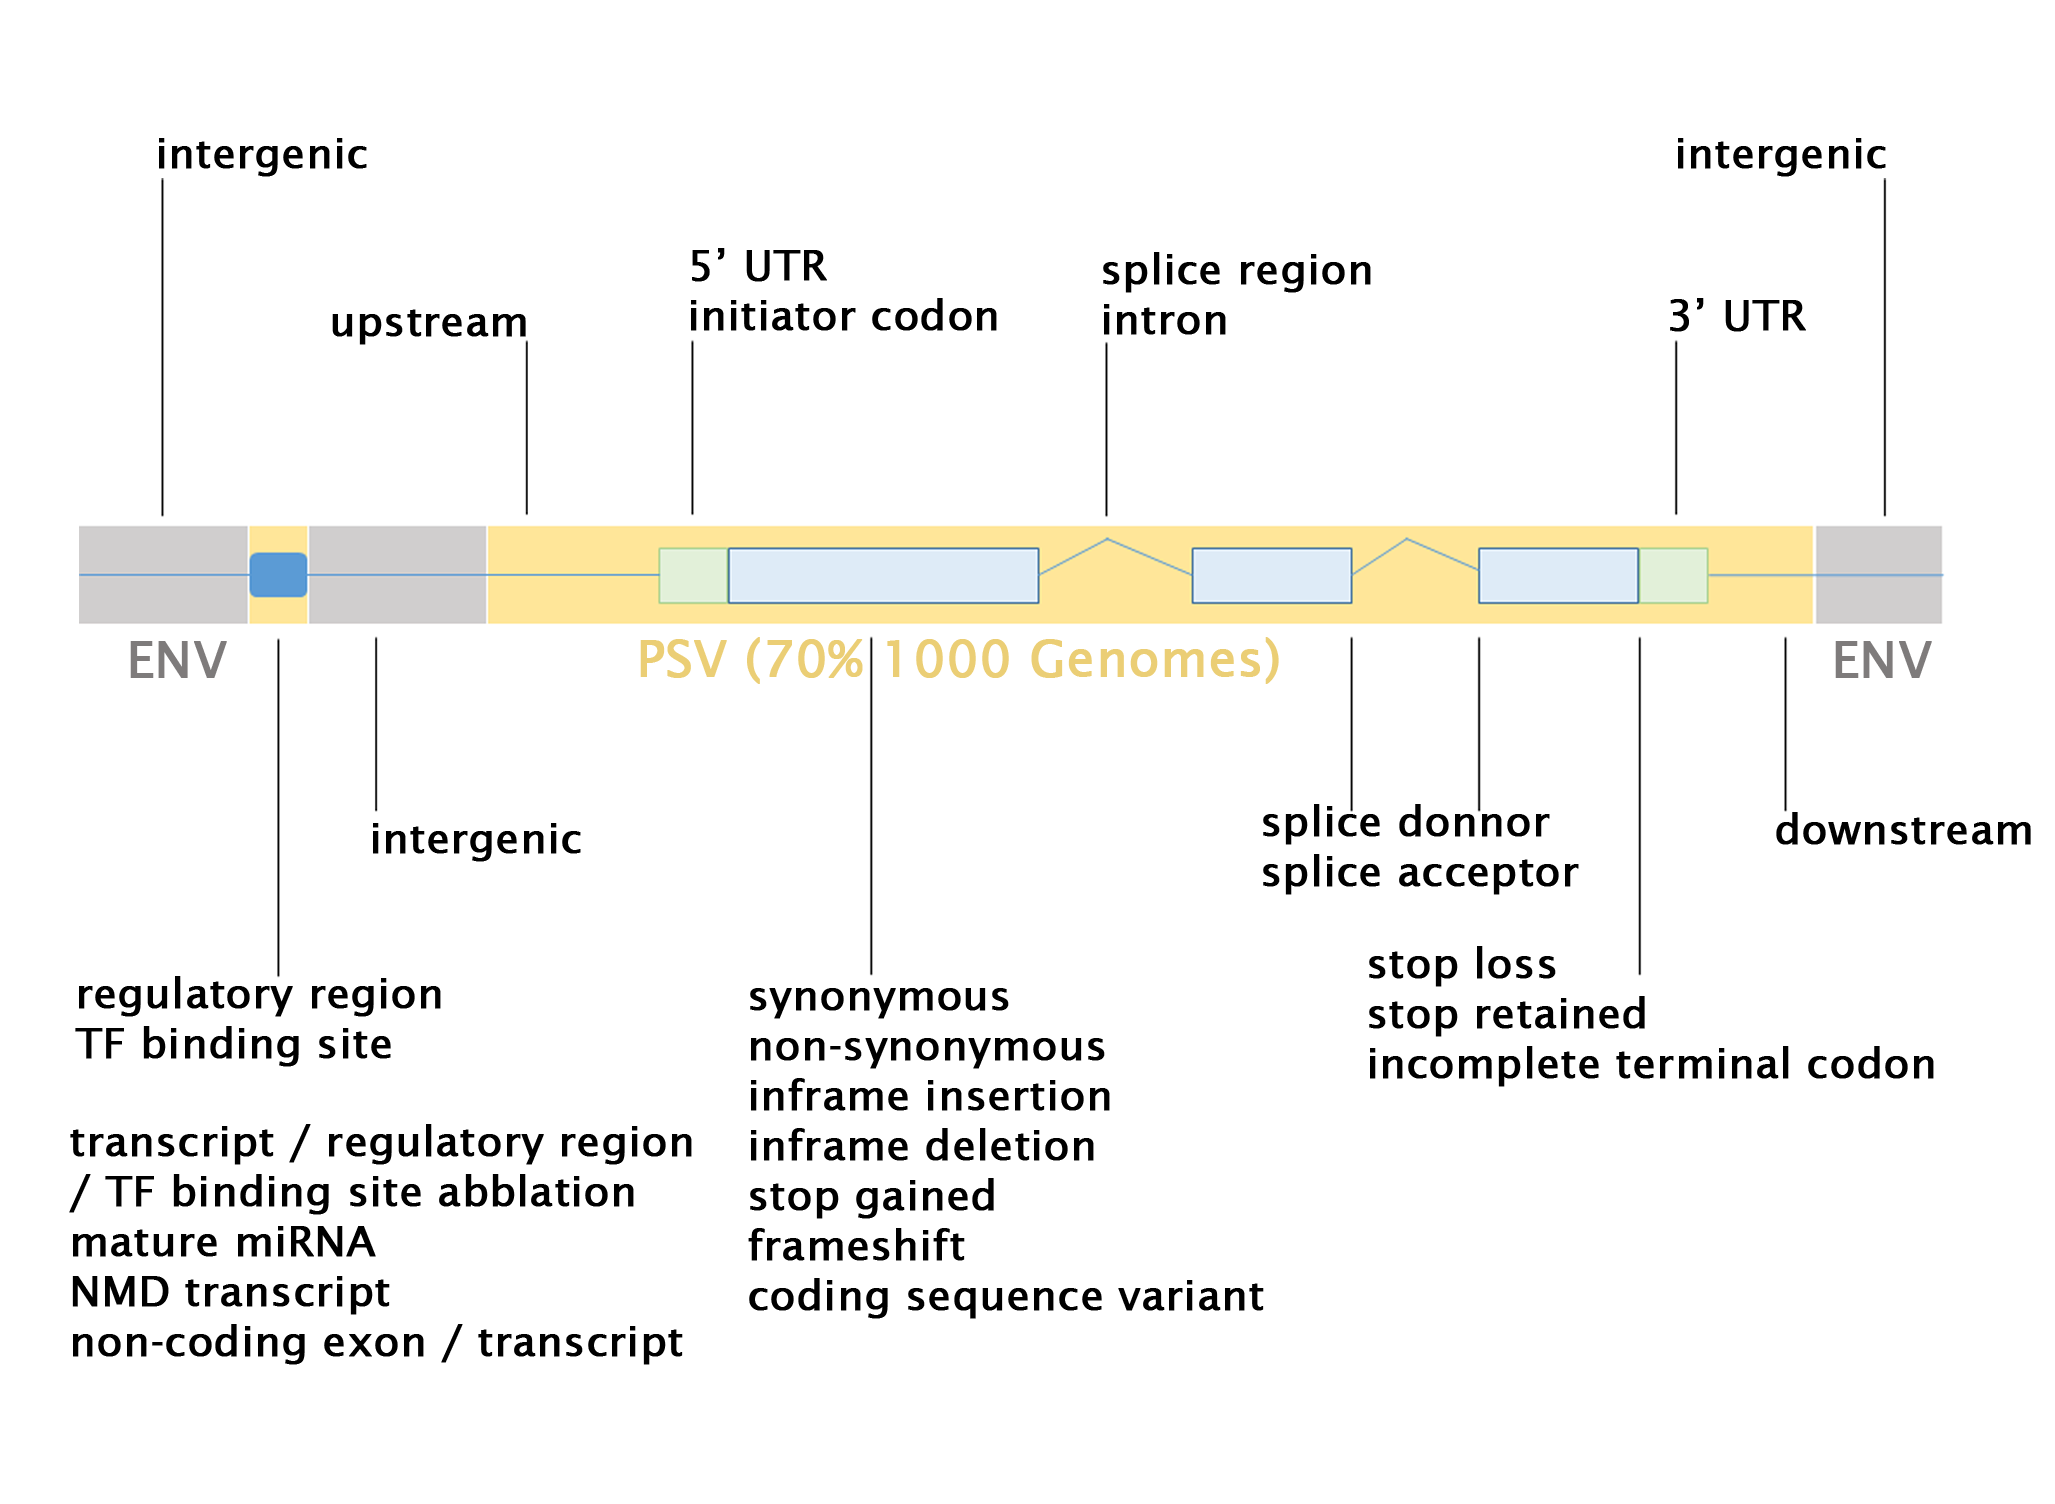


**Figure S13. VEP annotations.** VEP annotations used to define the PSVs and ENVs in the 1000G populations (PSVs and ENVs are shown in yellow and grey respectively). PSV SNPs account for ~70% of the 1000G SNPs.


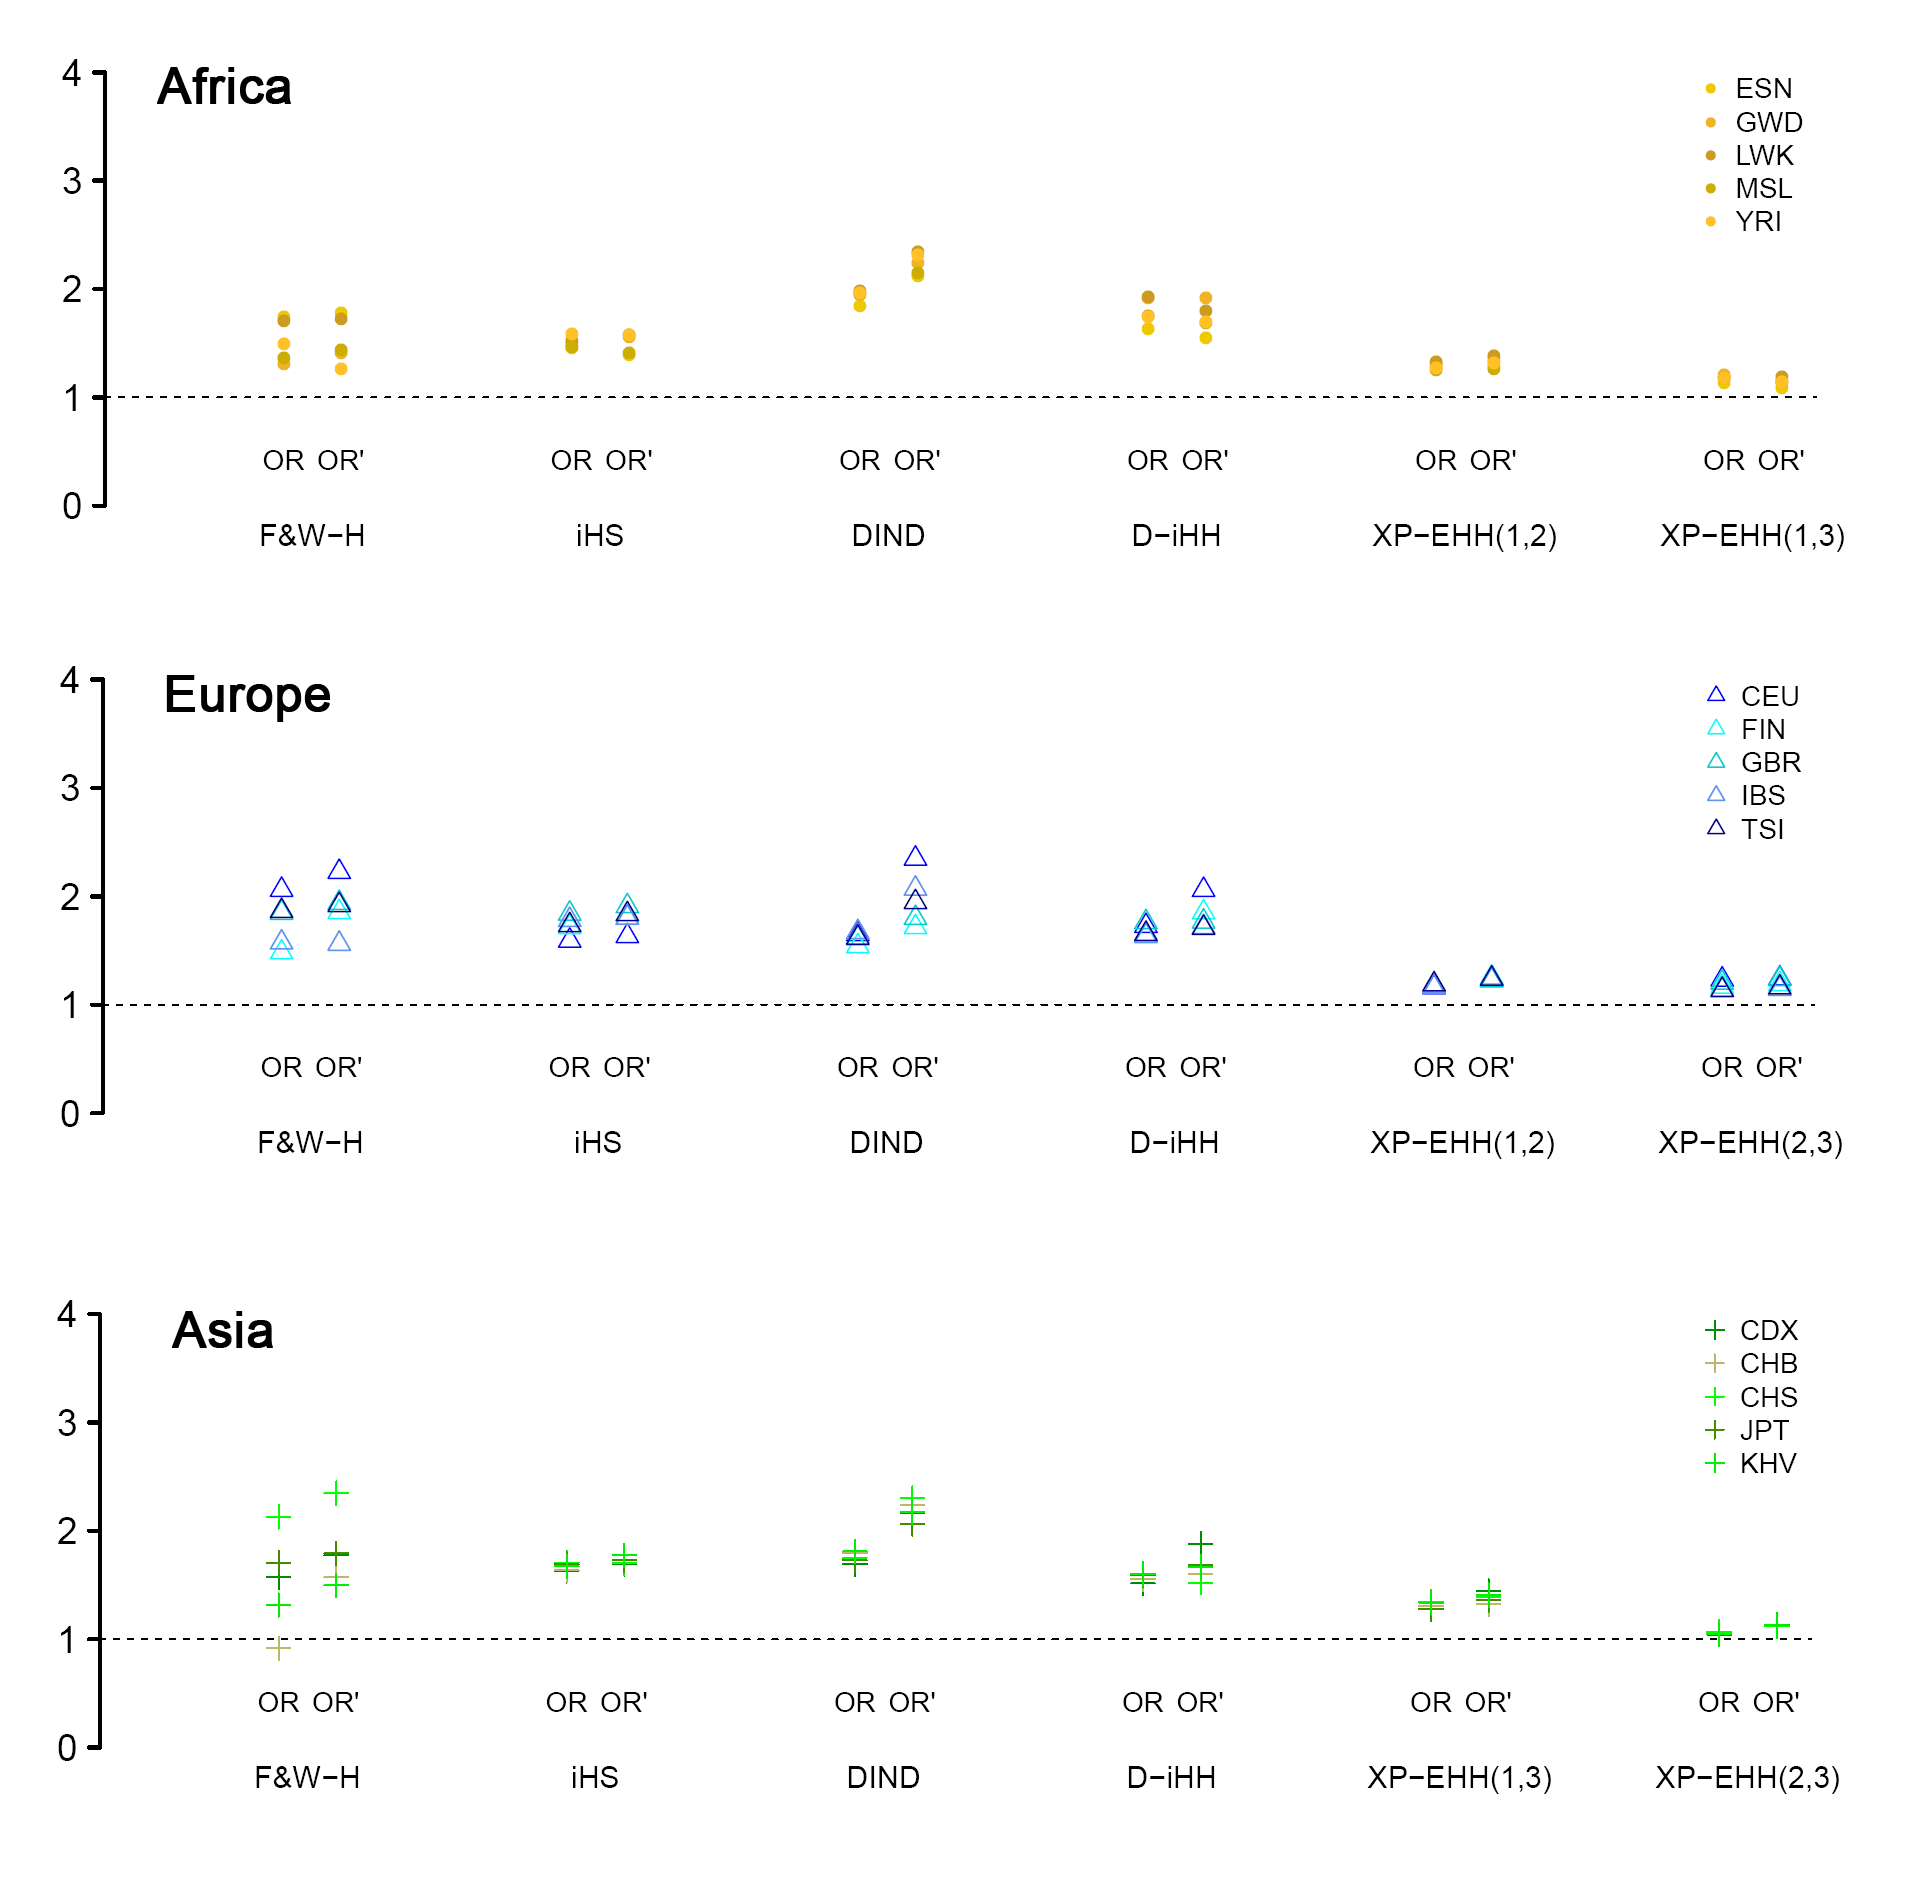


**Figure S14. 1000G empirical ORs.** 1000G empirical ORs computed for each neutrality statistic and corrected for genomic variations in coverage, mutation and recombination rates. OR stands for ORs computed merging chromosomes together. OR’ stands for ORs averaged across chromosomes (Materials and Methods).


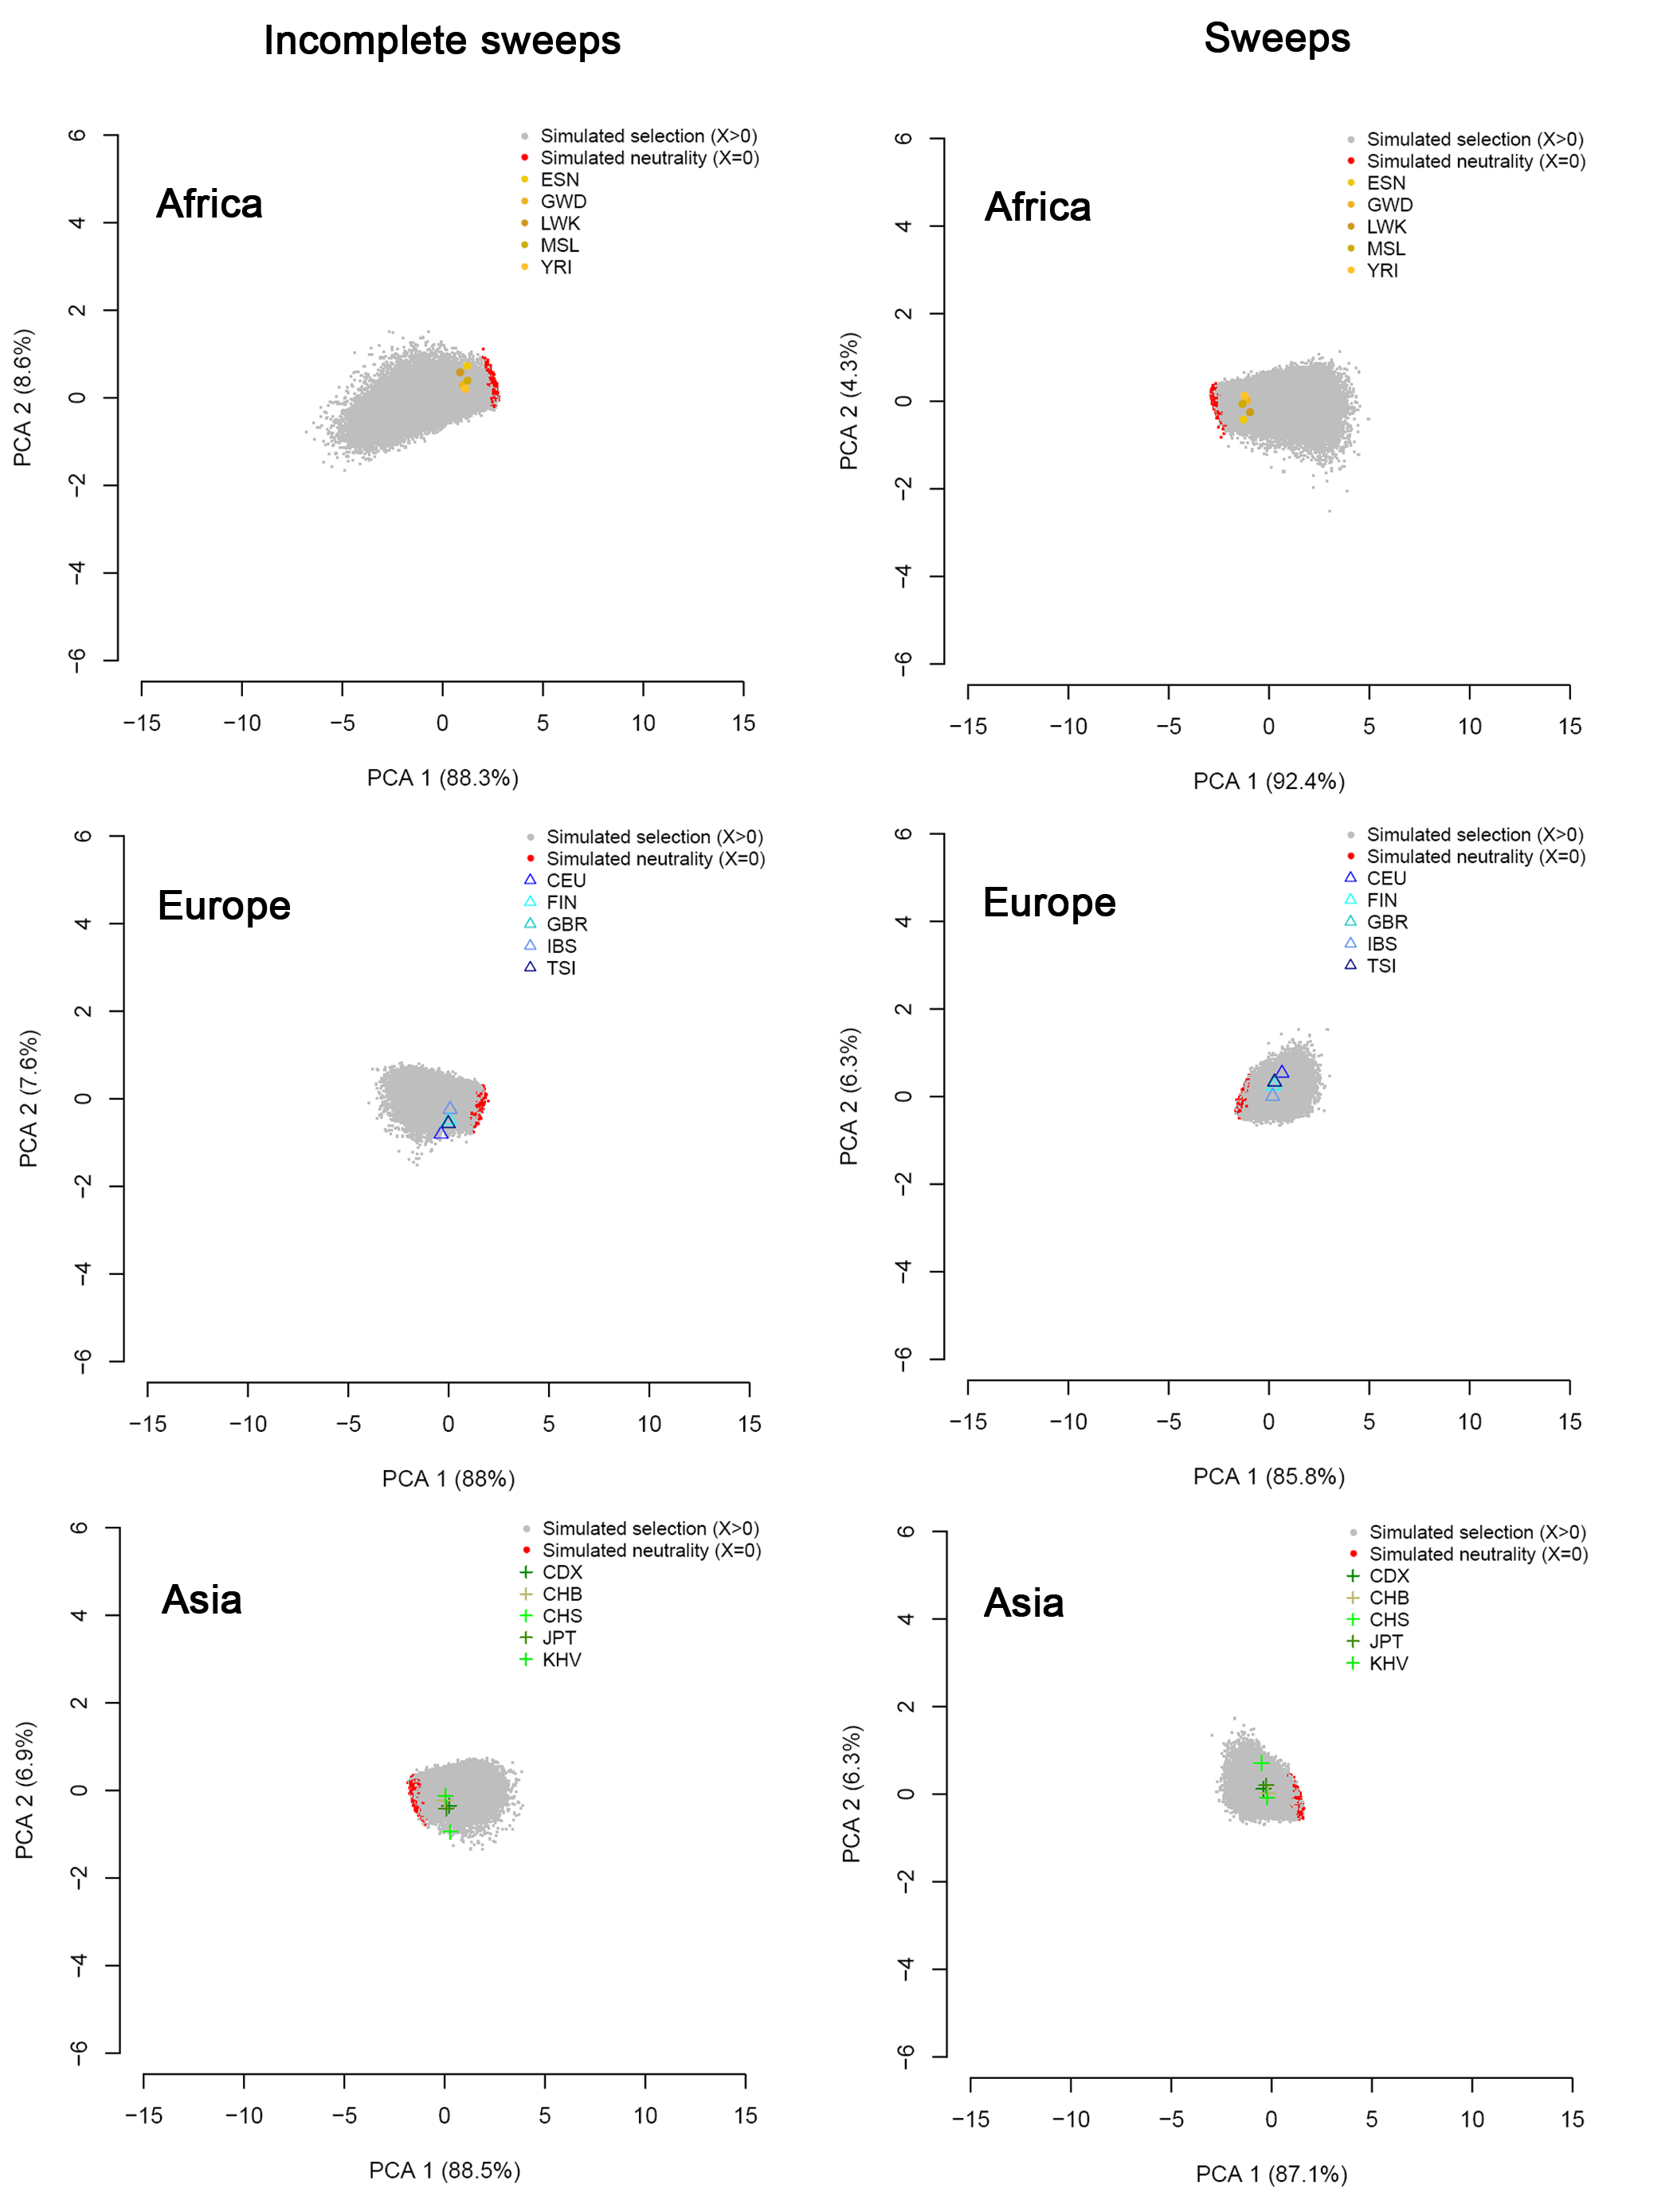


**Figure S15. PCA using simulated and 1000G ORs.** PCA of simulated ORs merged with the 1000G ORs averaged across chromosomes. On the left, ABC simulations used to perform the estimations under the incomplete sweep scenario. On the right, ABC simulations used to perform the estimations under the sweep scenario. For convenience, only a small fraction of the ABC simulations performed are displayed.


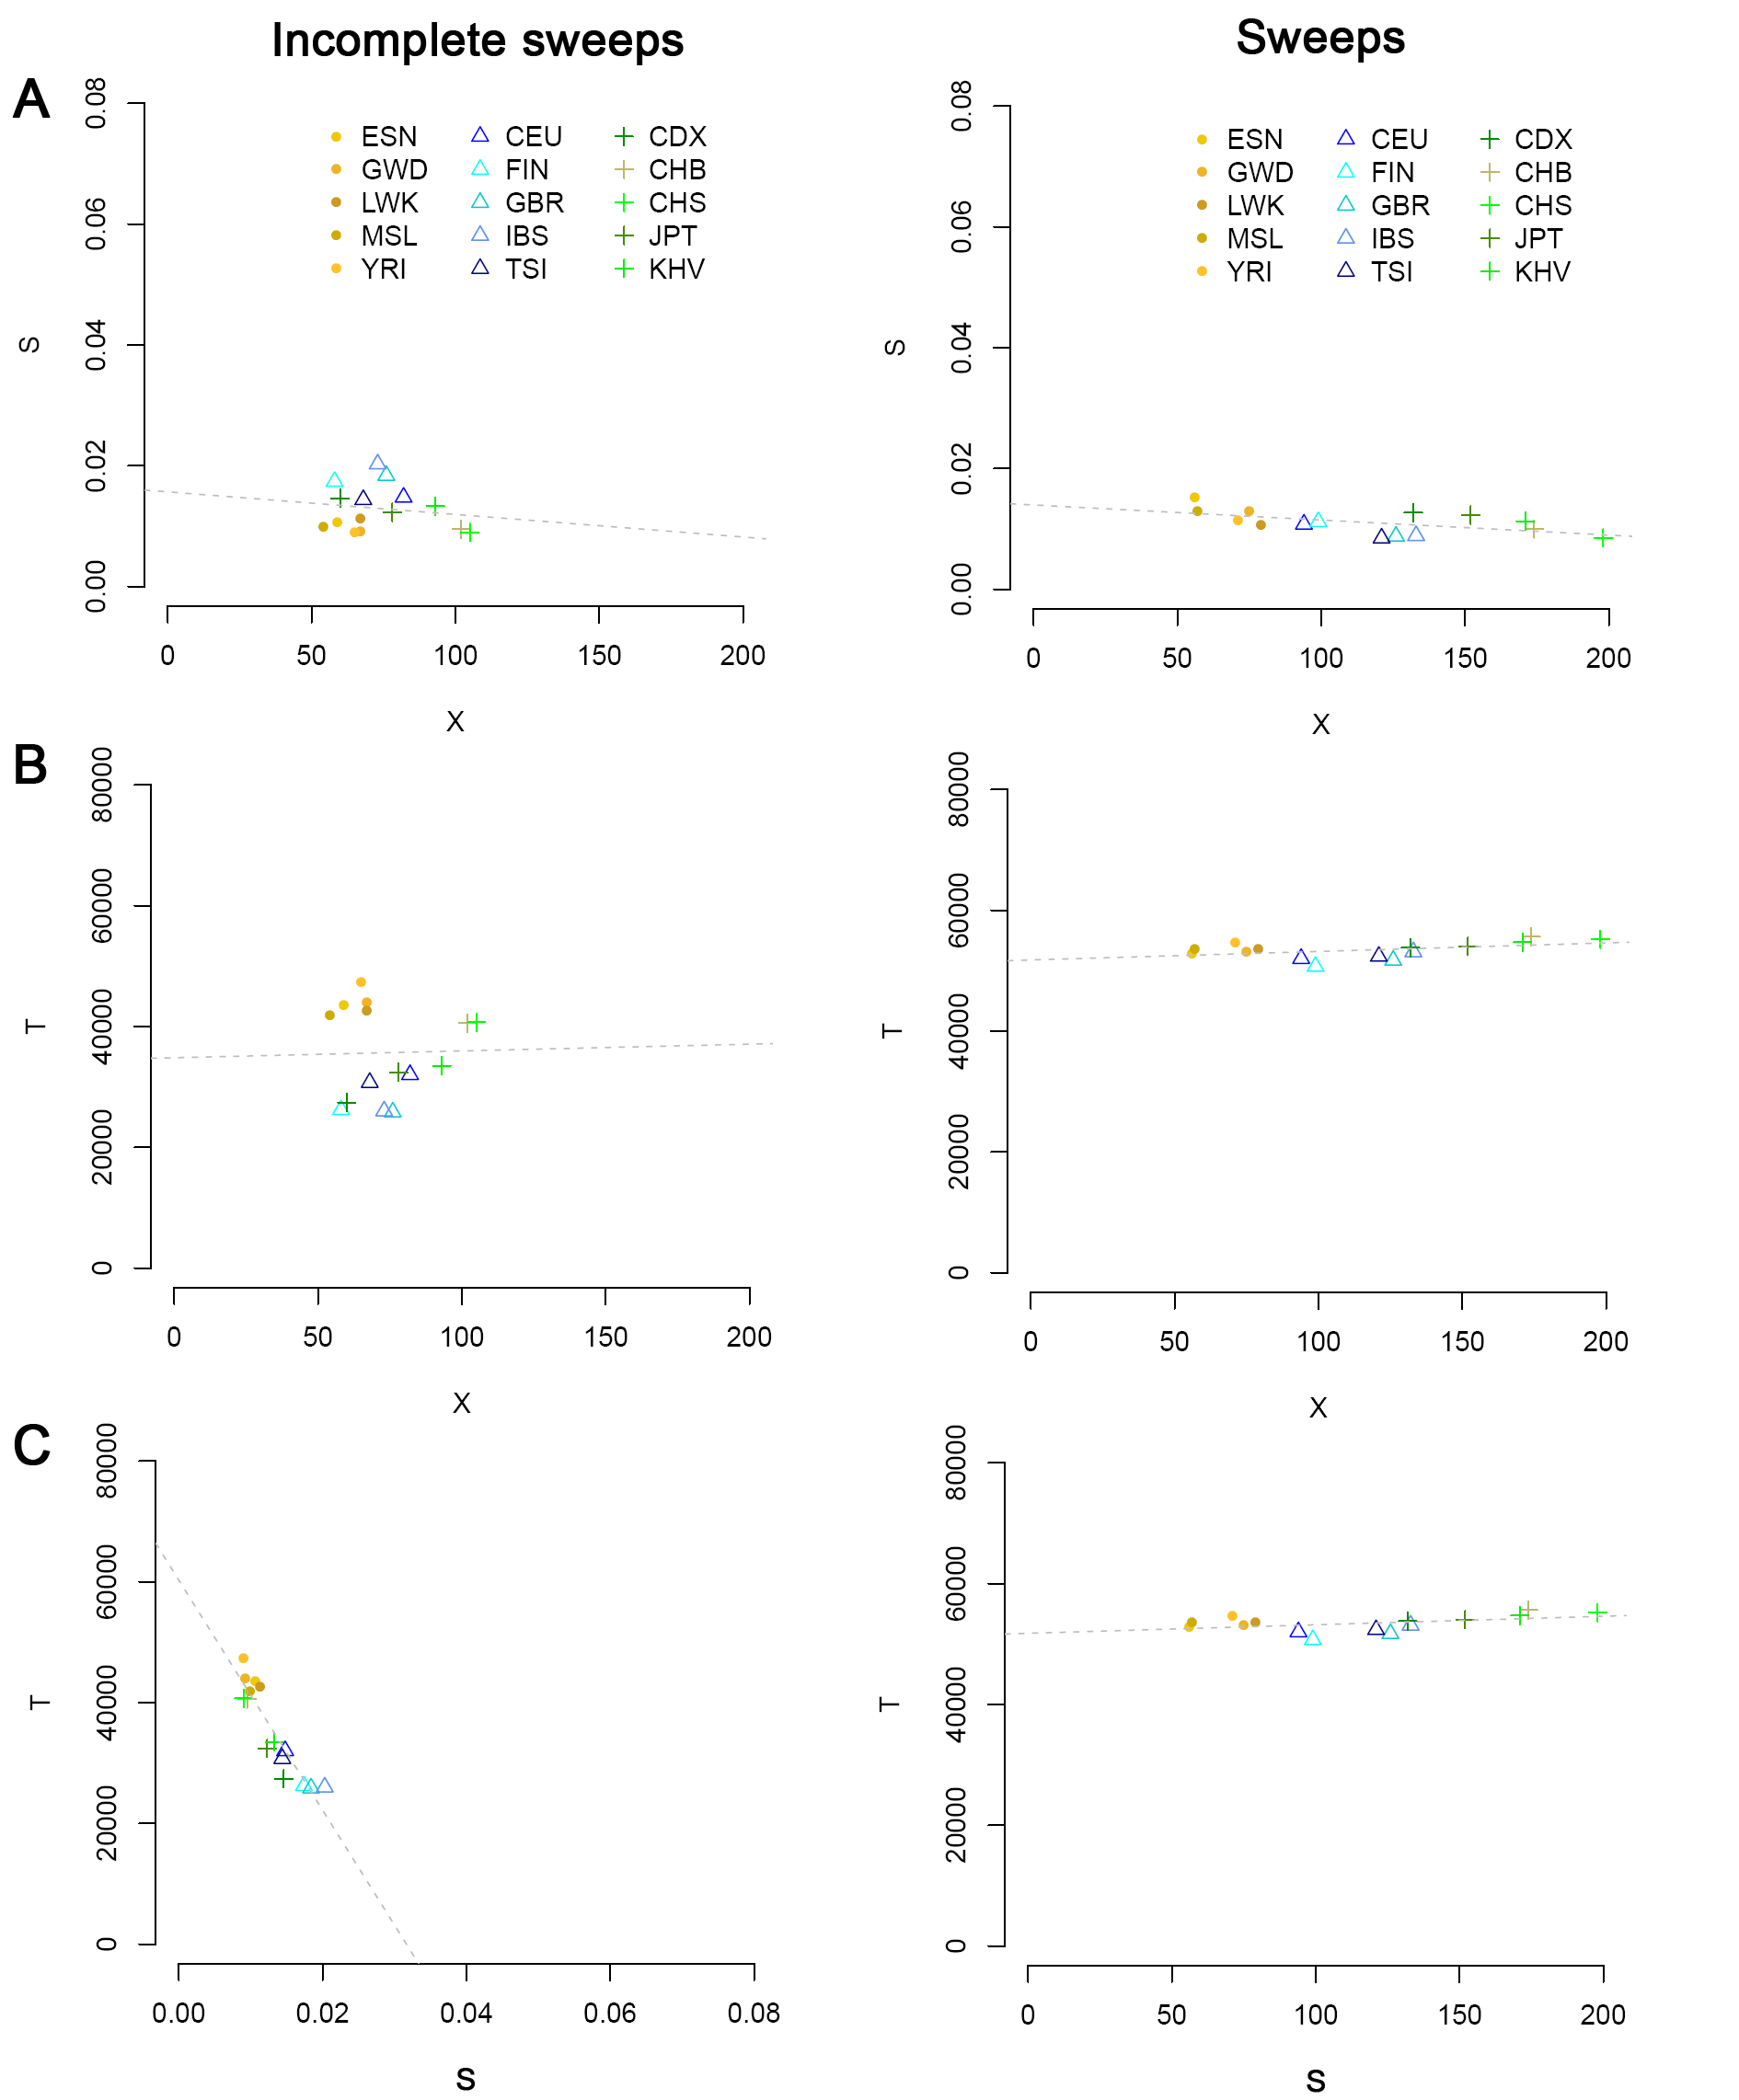


**Figure S16. Correlations between *X* and *S* or *T* estimated in 1000G populations.** The ABC estimates are those shown in Tables 1 and 2 (estimations obtained using the 1000G ORs averaged across chromosomes). (**C**) In the incomplete sweep scenario (left hand side), the significant correlation obtained between the estimations of *S* and *T* are due to the exclusion of complete sweeps. Regression lines are indicated in grey.


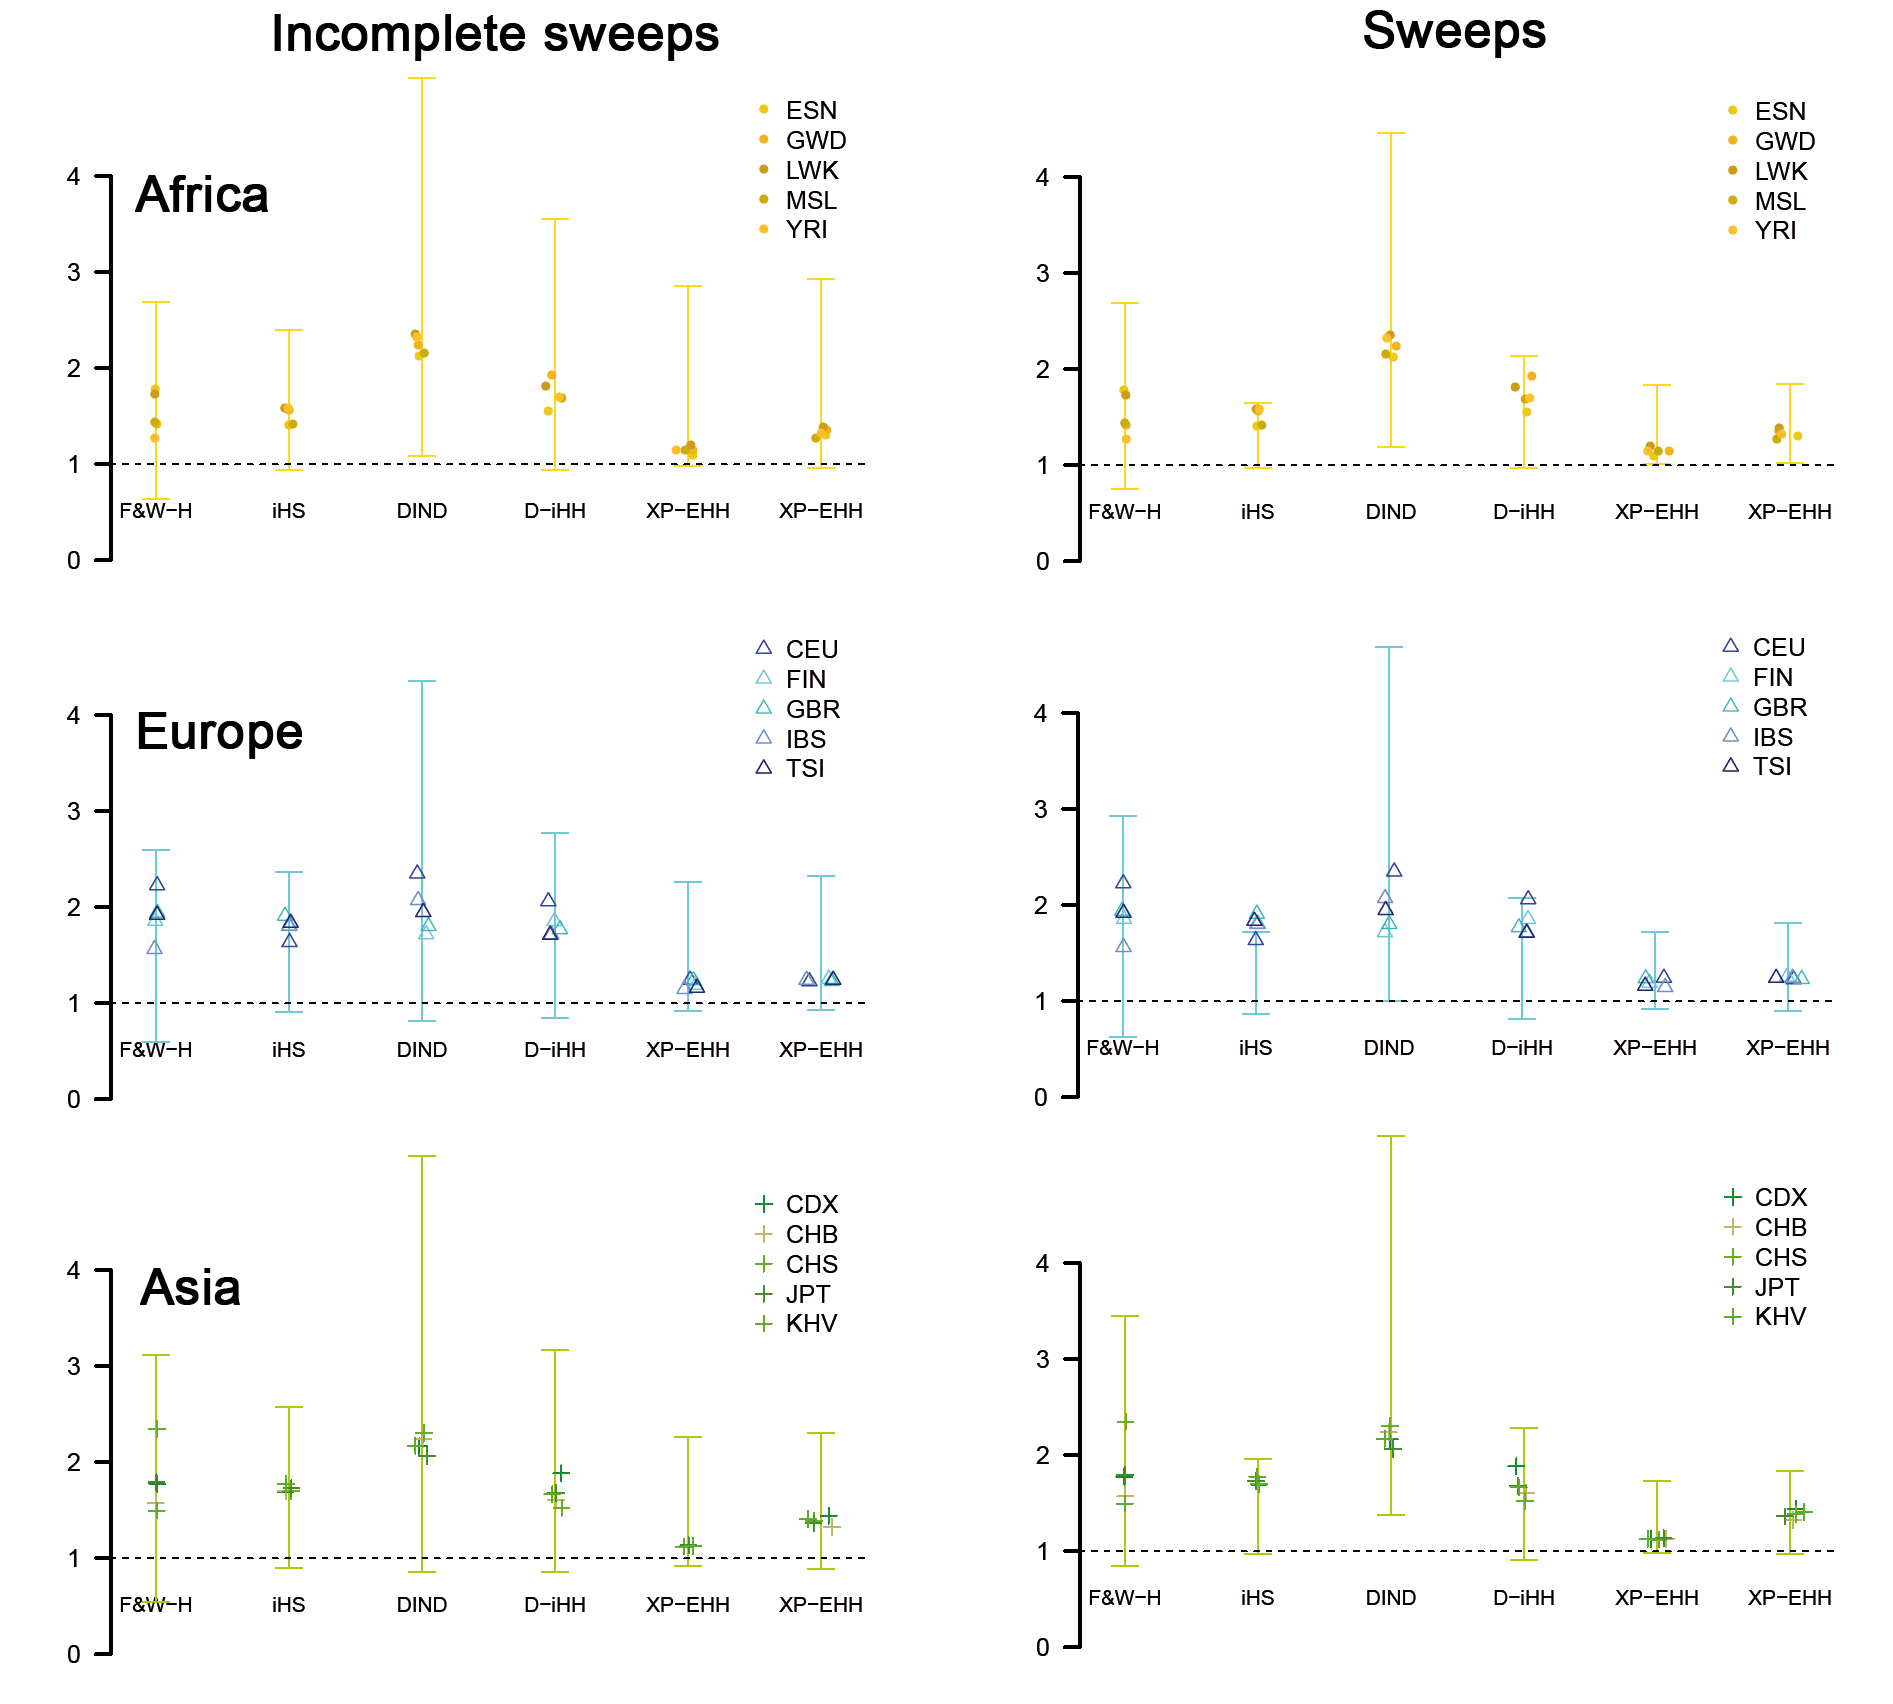


**Figure S17. Posterior predictive checks of the 1000G estimations.** Simulated ORs obtained by simulating the estimated model compared to the 1000G ORs. The estimations of *X*, *S* and *T* obtained using the 1000G ORs averaged across chromosomes (Tables 1 and 2) were used to perform the posterior predictive checks. The simulations were performed by randomly drawings parameters values within the CIs of these estimations. The vertical bars indicate the 99% confidence intervals of the simulated ORs.


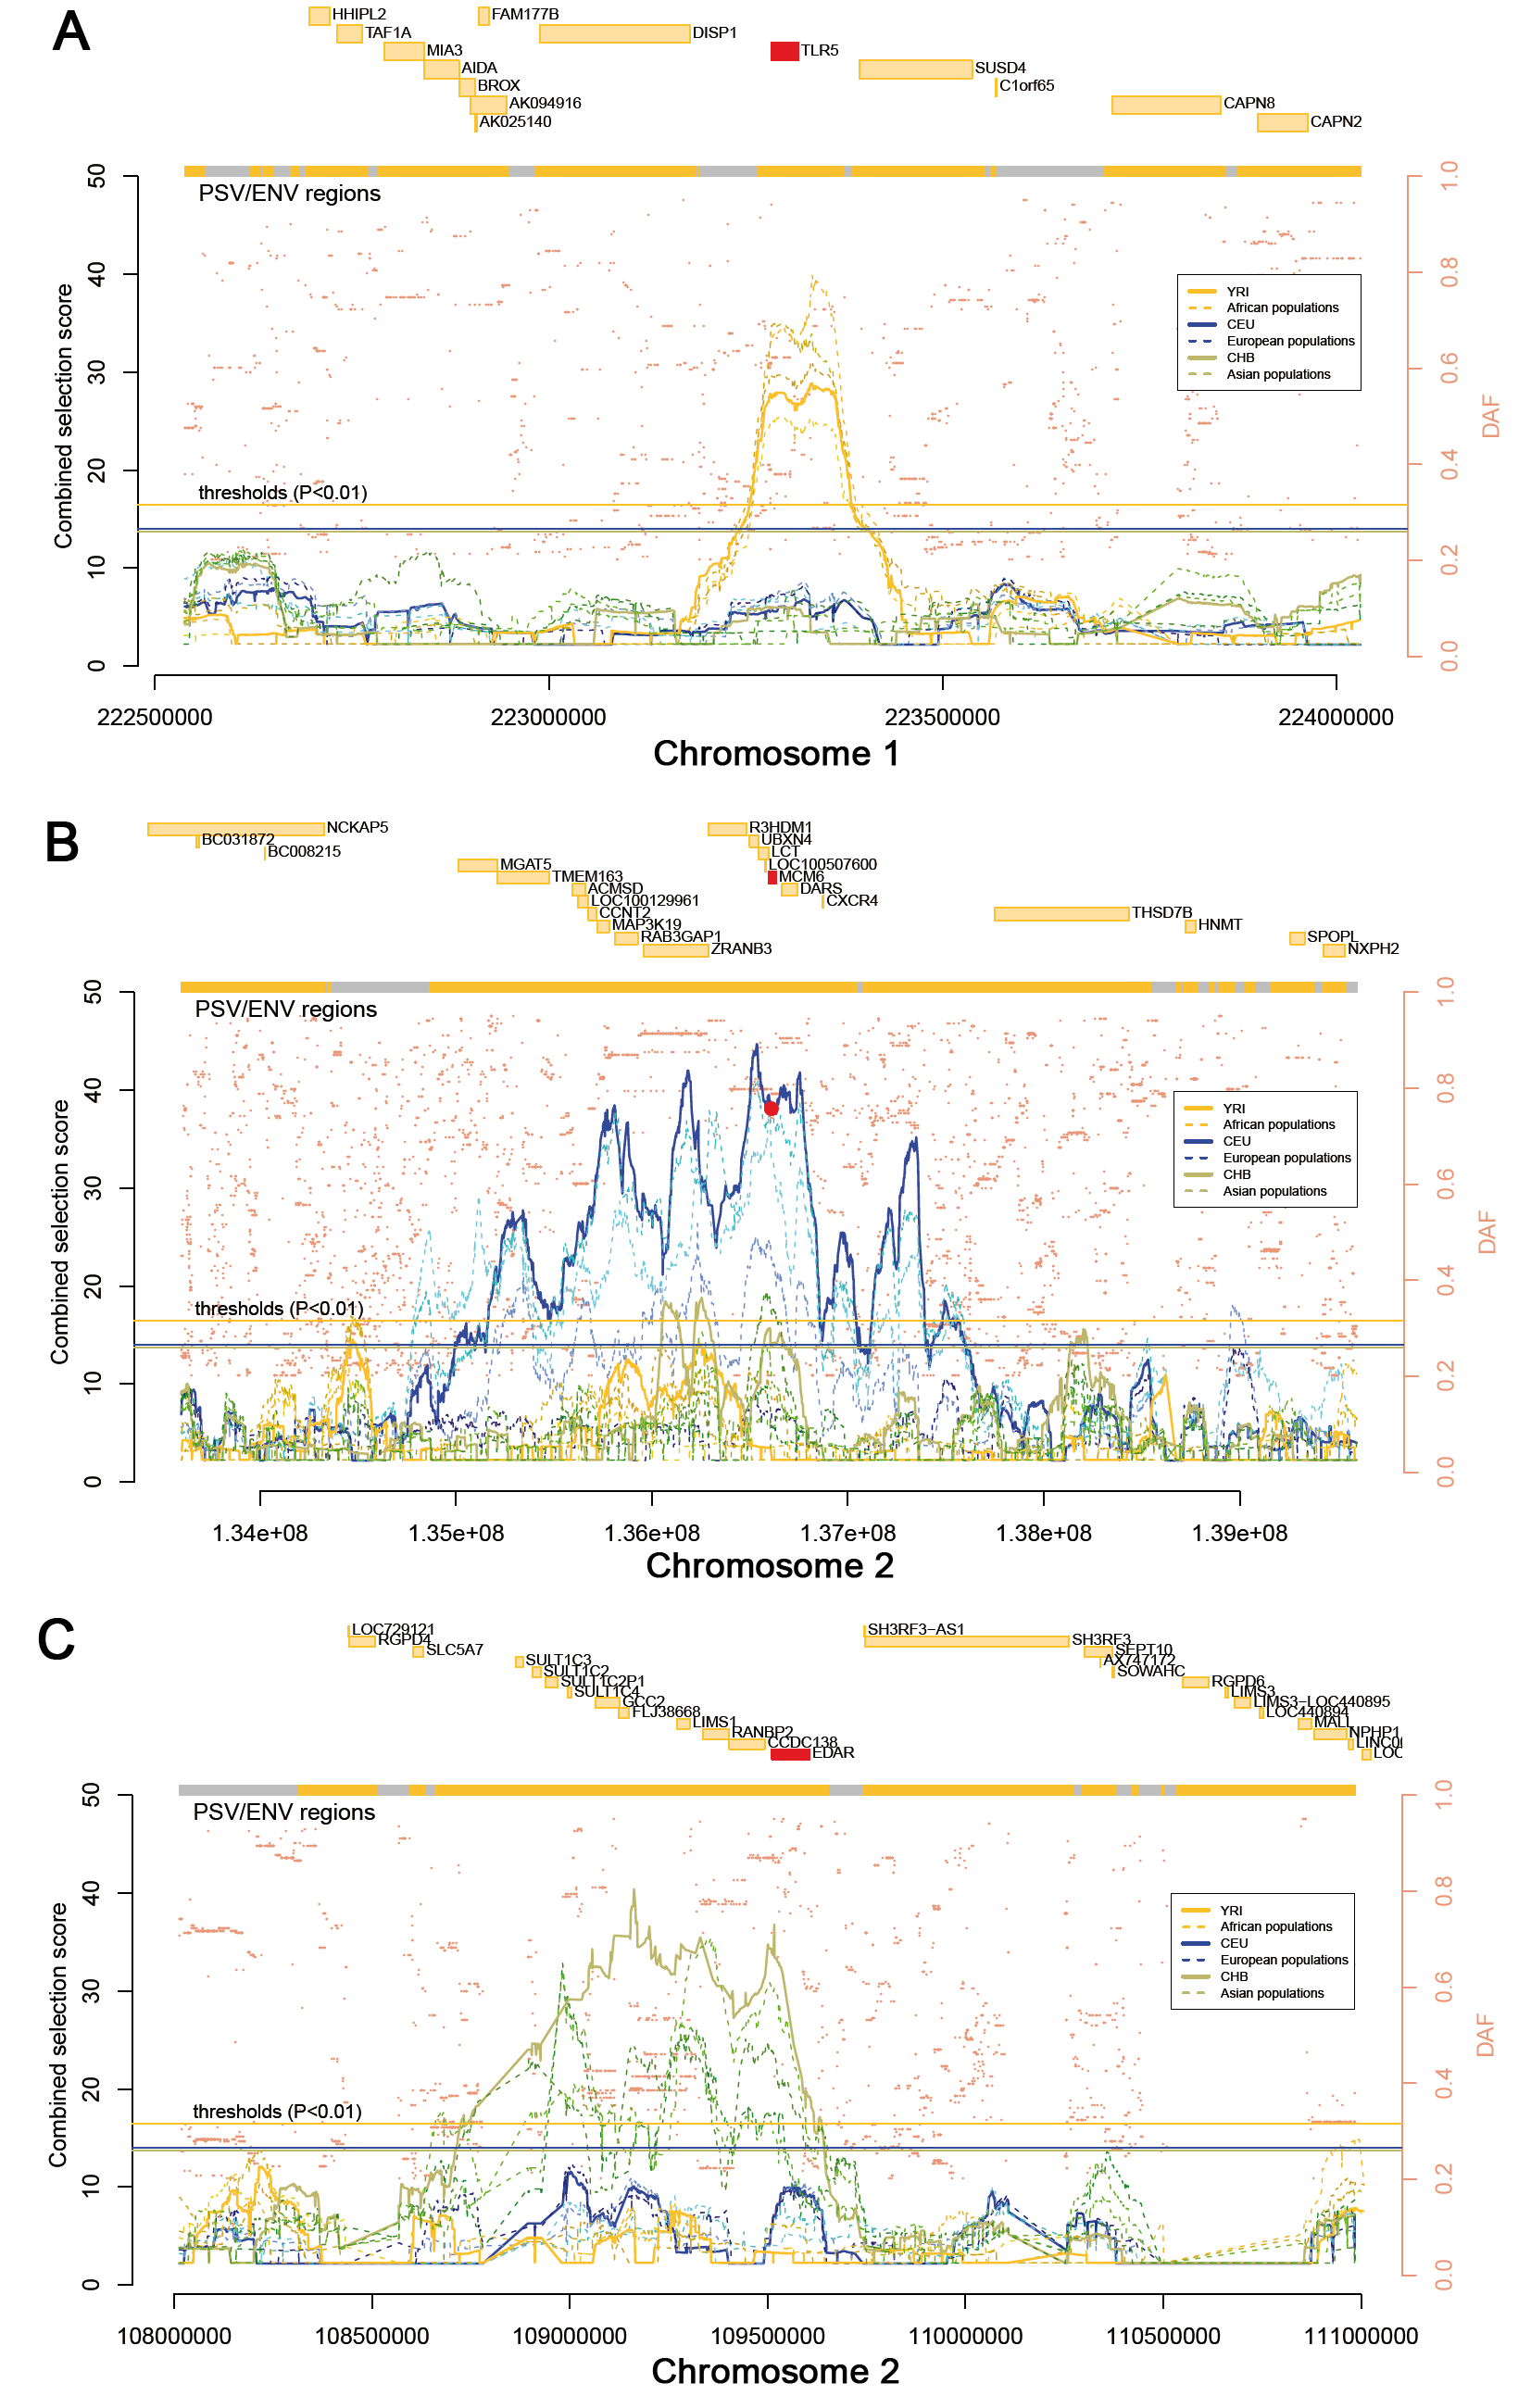


**Figure S18. PSVs in genomic regions** **identified by our classic selection scan.** The limits of the PSV regions (yellow) are indicated on the top of each plot. Broken lines are the combined selection score computed 100kb around each SNP. The YRI, CEU and CHB populations are displayed (colored bold lines). The other populations are shown for comparison (colored dashed lines). (**A**) The TLR5 region, (**B**) the LCT-MCM6 (rs4988235, red dot) region and (**C**) the EDAR region.


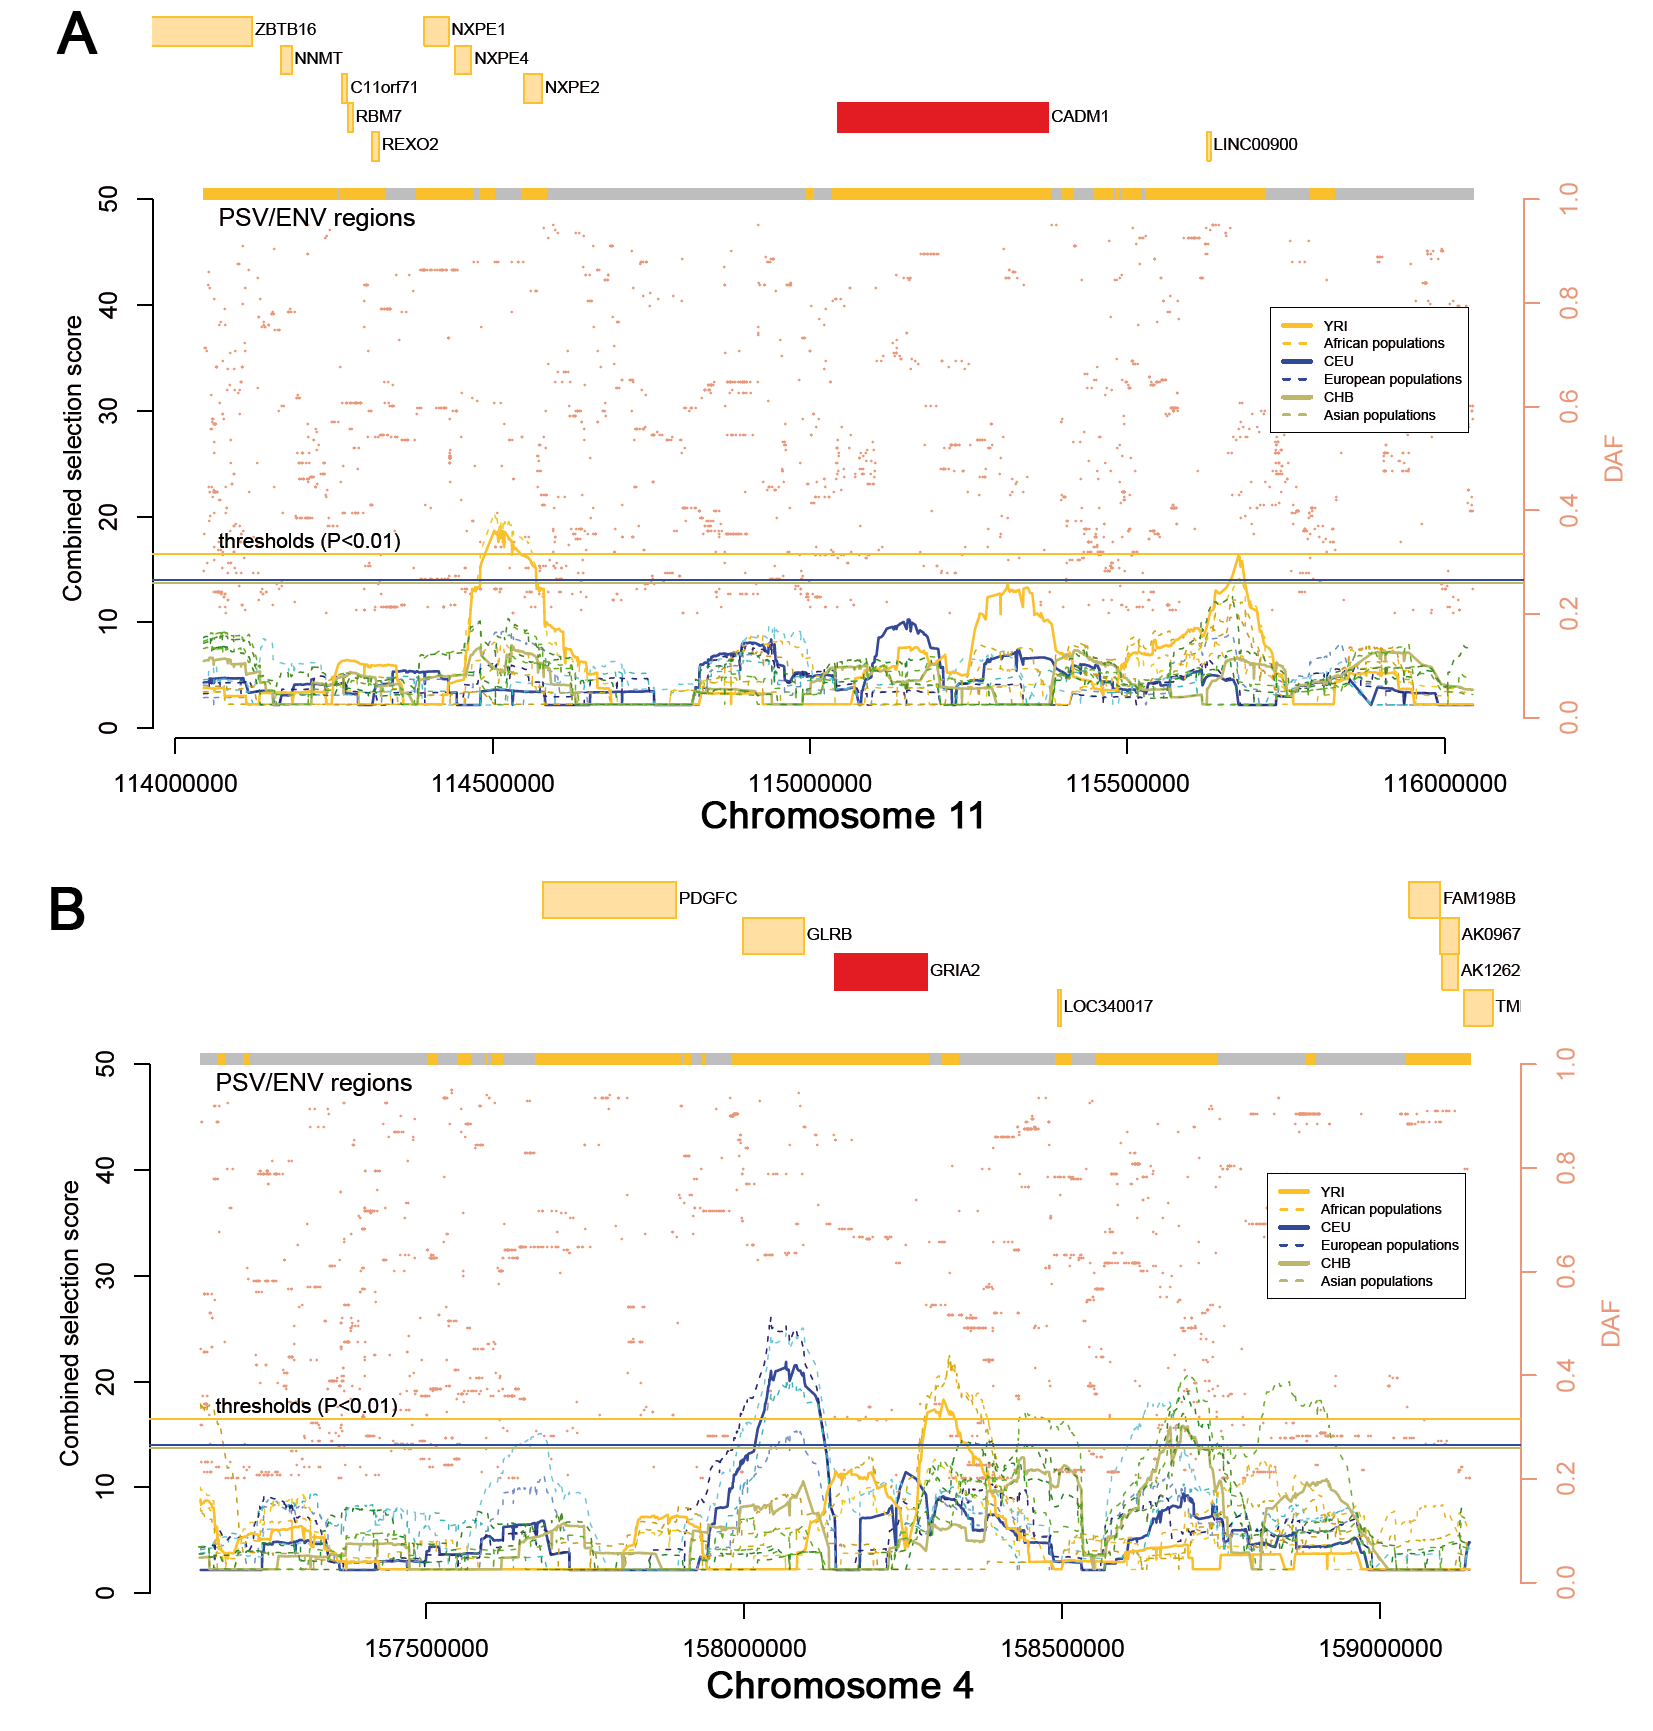


**Figure S19. PSVs in genomic regions identified by the Schrider and Kern’s selection scan.** See the legend of the previous figure. (**A**) CADM1 was not retrieved by our selection scan while (**B**) GLRB (on the left side of GRIA2) was identified in CEU (Table S3).


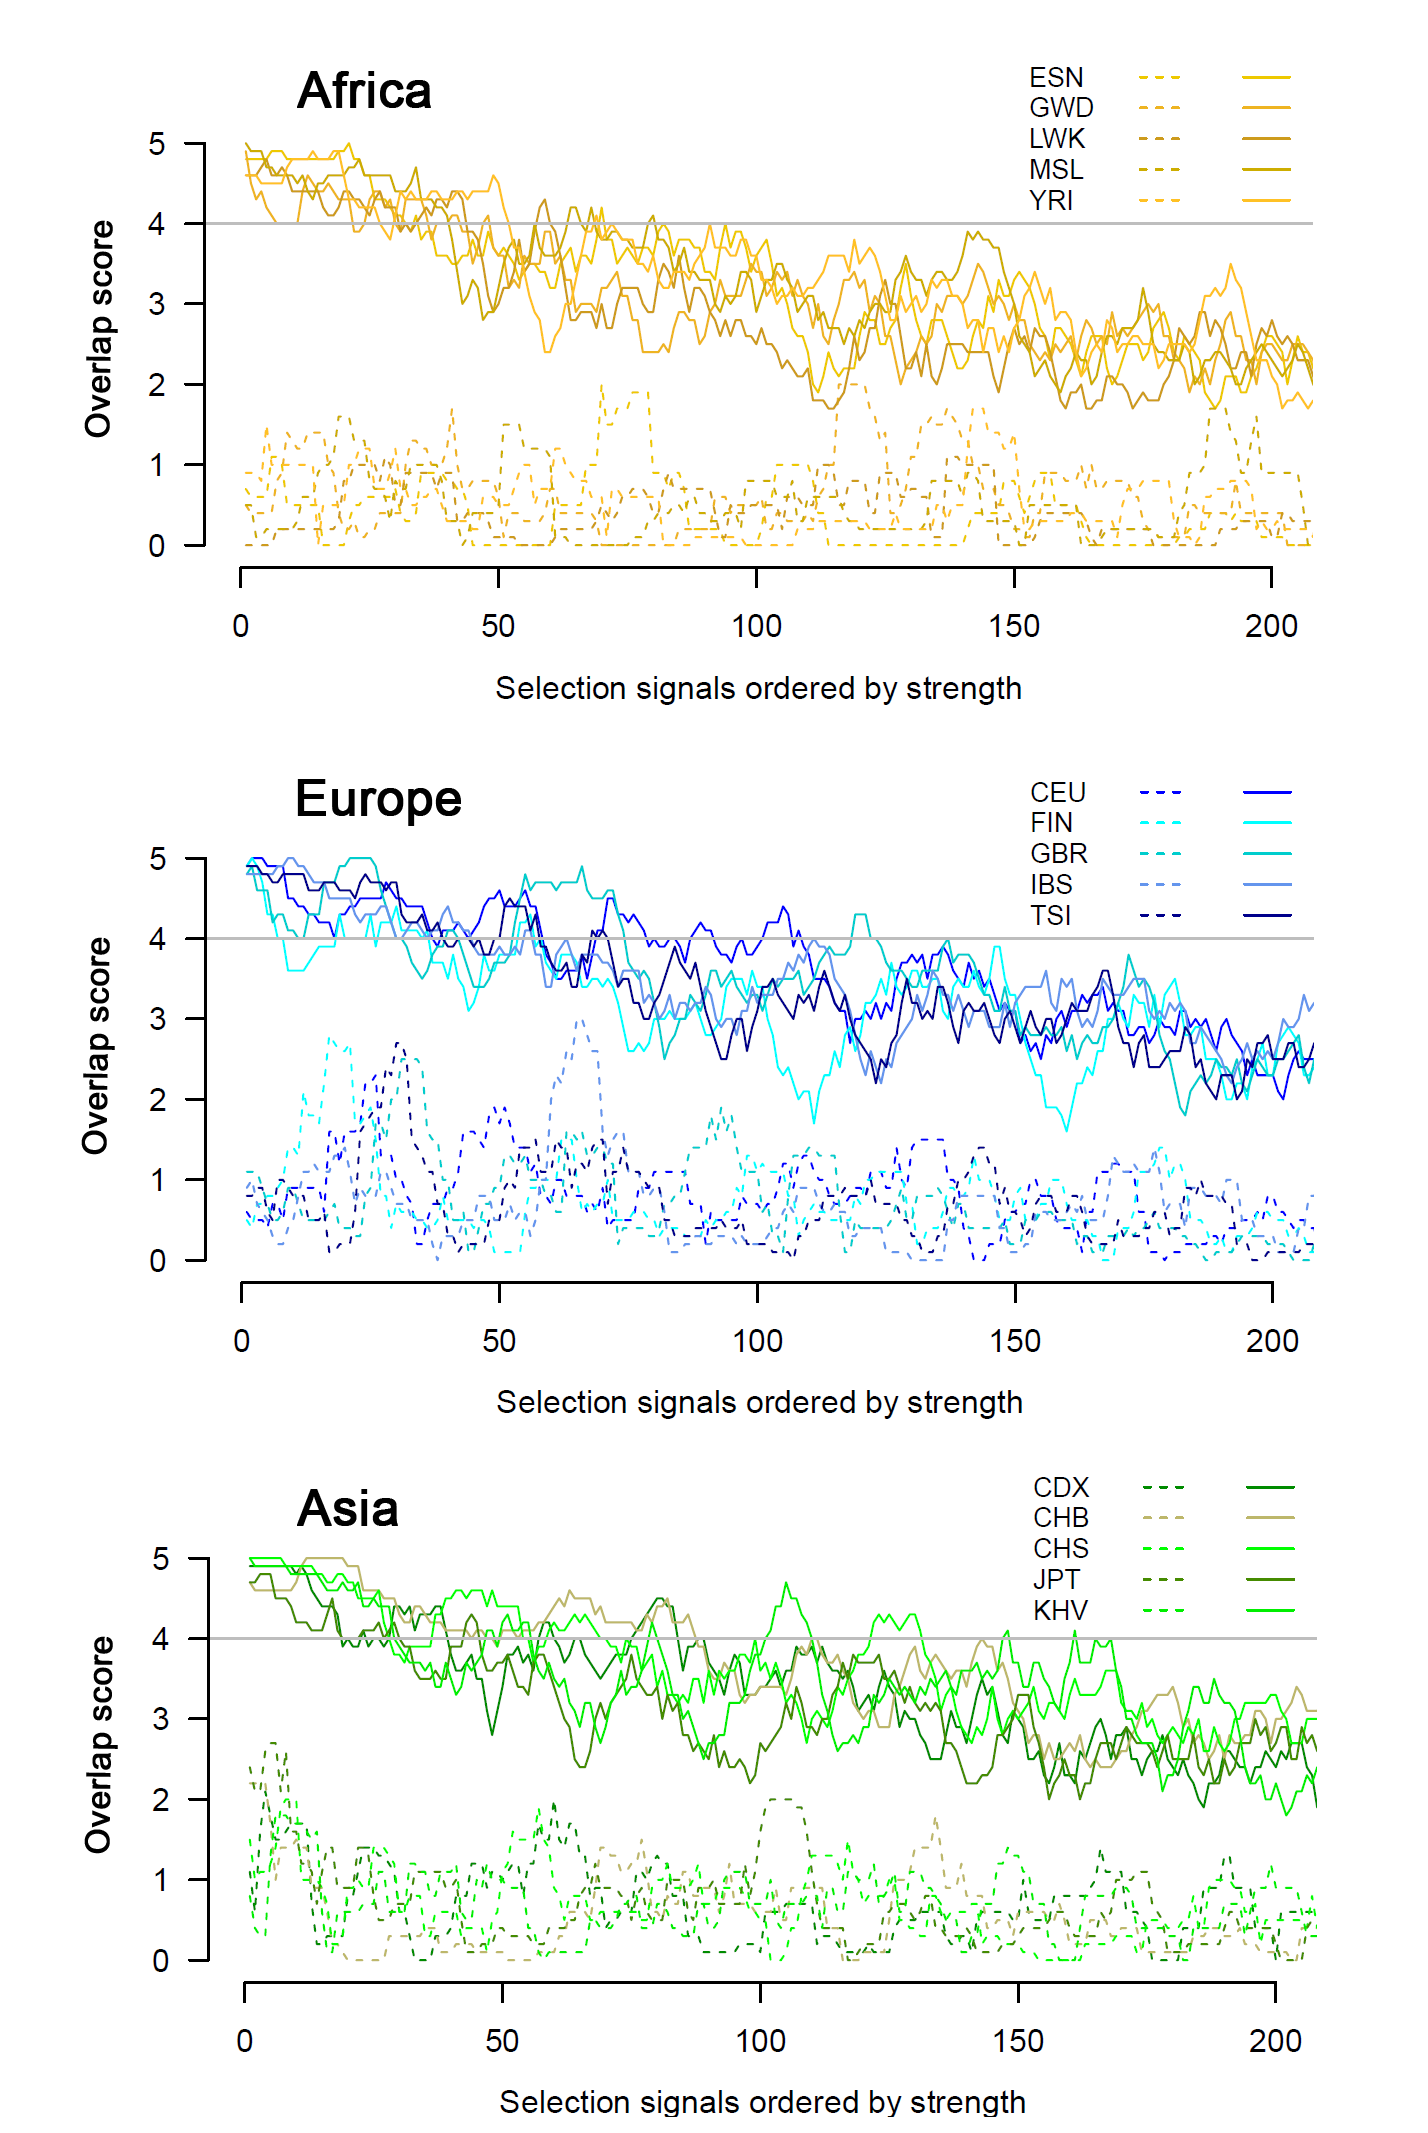


**Figure S20. Overlap of selection signals within and between continents.** Solid and dashed lines indicate the overlap scores of selection computed within and between continents (Materials and Methods). In each population, genomic regions are sorted by the strength of selection signal (*x* axis, descendent order from the left to the right), assessed by means of the maximum value of combined scores of selection obtained in the region (Materials and Methods). Variations are buffered by using moving averages of 10 genomic regions.


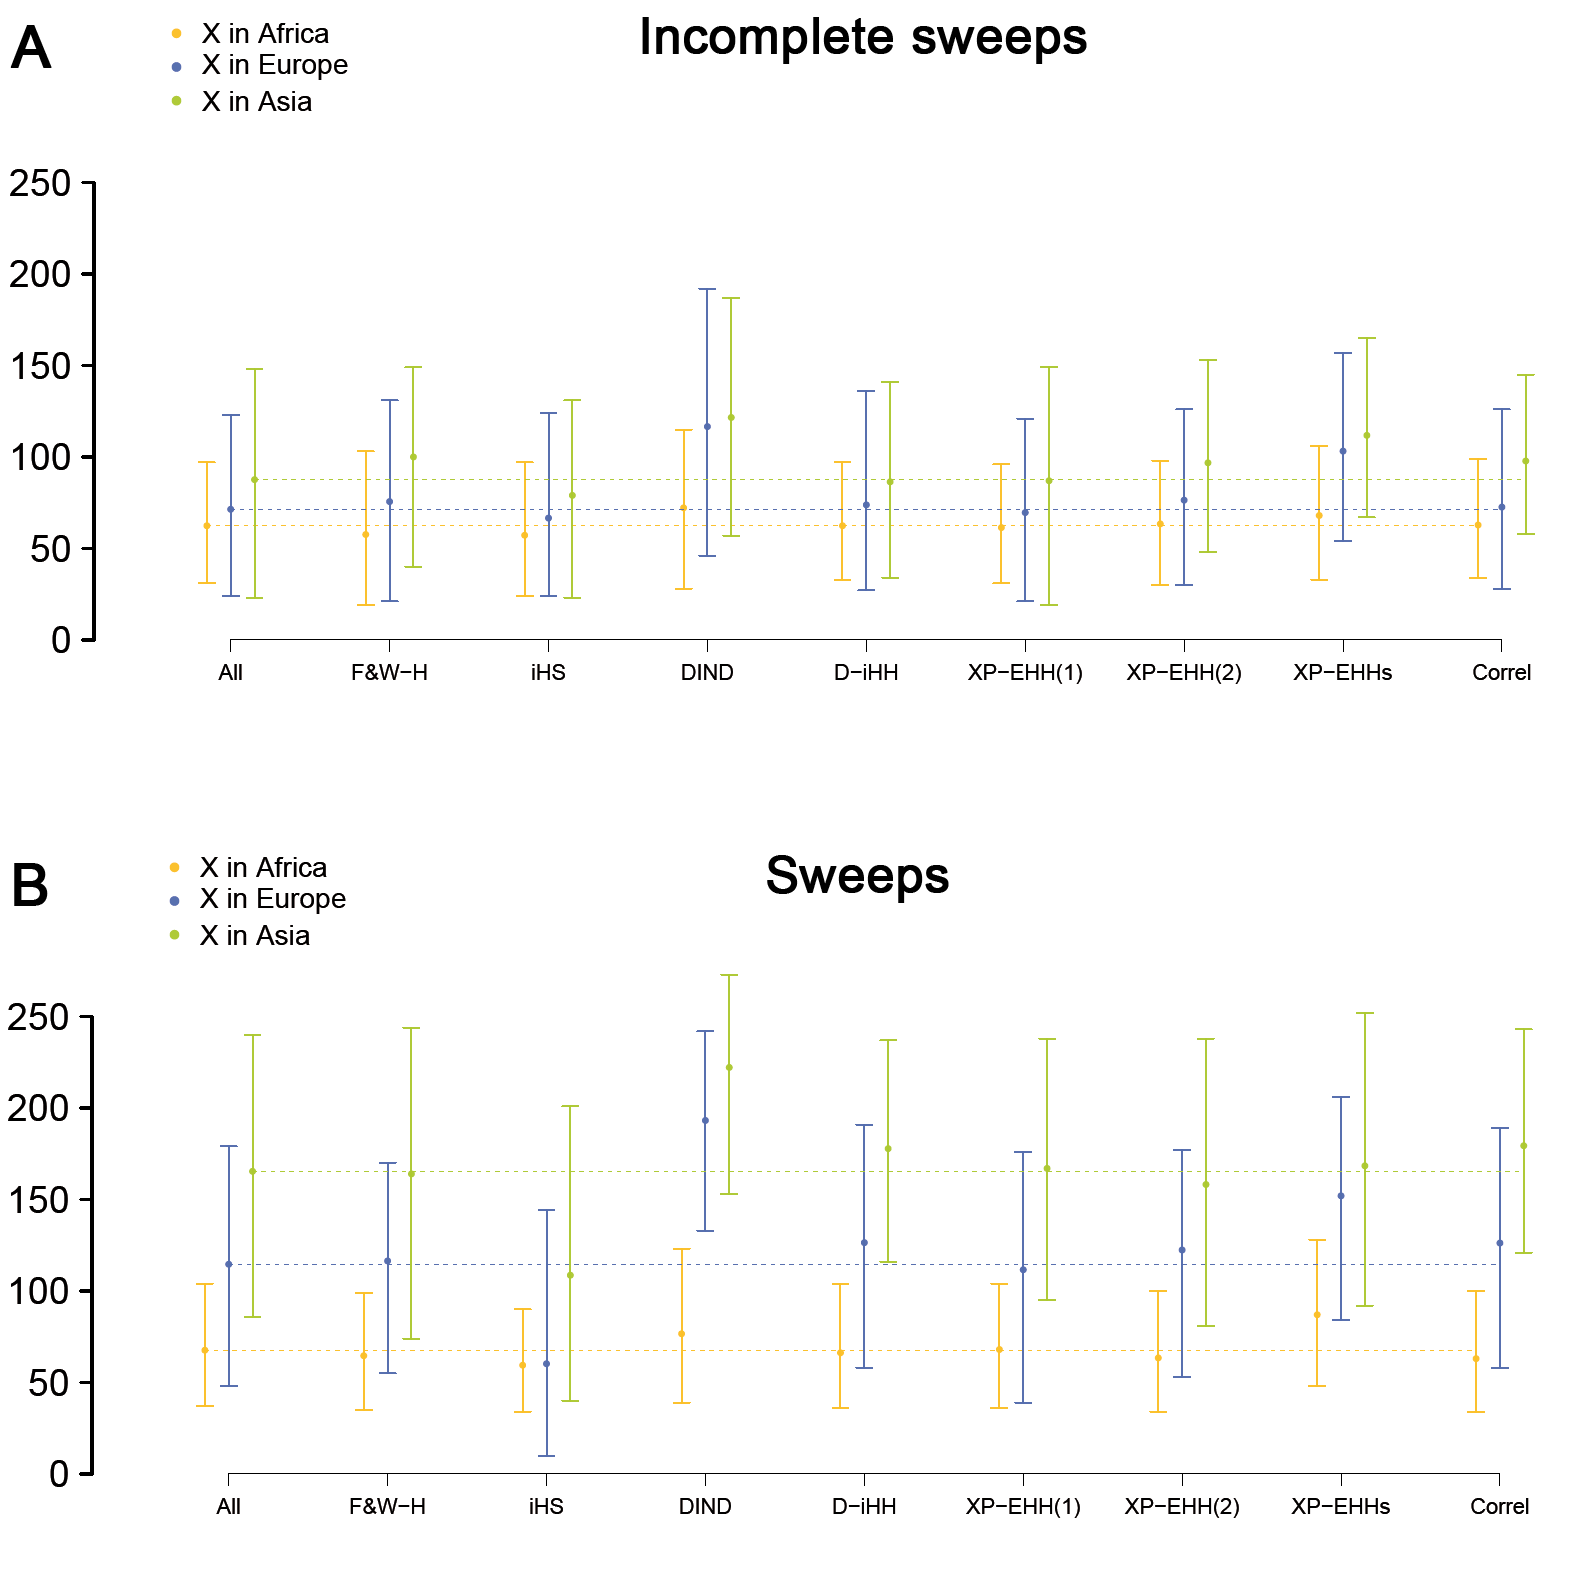


**Figure S21. Estimations using different combinations of neutrality statistics.** New estimations using five 1000G ORs only, i.e., excluding one summary statistic each time. The estimations were performed using the 1000G ORs averaged across chromosomes. (**A-B**) Mean numbers of selective sweeps estimated per continent (point estimates and 95% CIs averaged across populations of the same continental origin, the 95% CIs are indicated with vertical bars). ‘All’ refers to the estimations performed using all summary statistics (Table 1). Other labels refer to the estimations performed after removing the indicated statistics. XP-EHHs refers to the removal of the two interpopulation statistics. ‘Corell’ refers to the removal of one neutrality statistic among pairs that exhibit the highest correlation coefficients (basically we removed DIND and ΔiHH correlated with iHS, and XP_EHH(2) correlated with XP_EHH(1), see the next Figure).


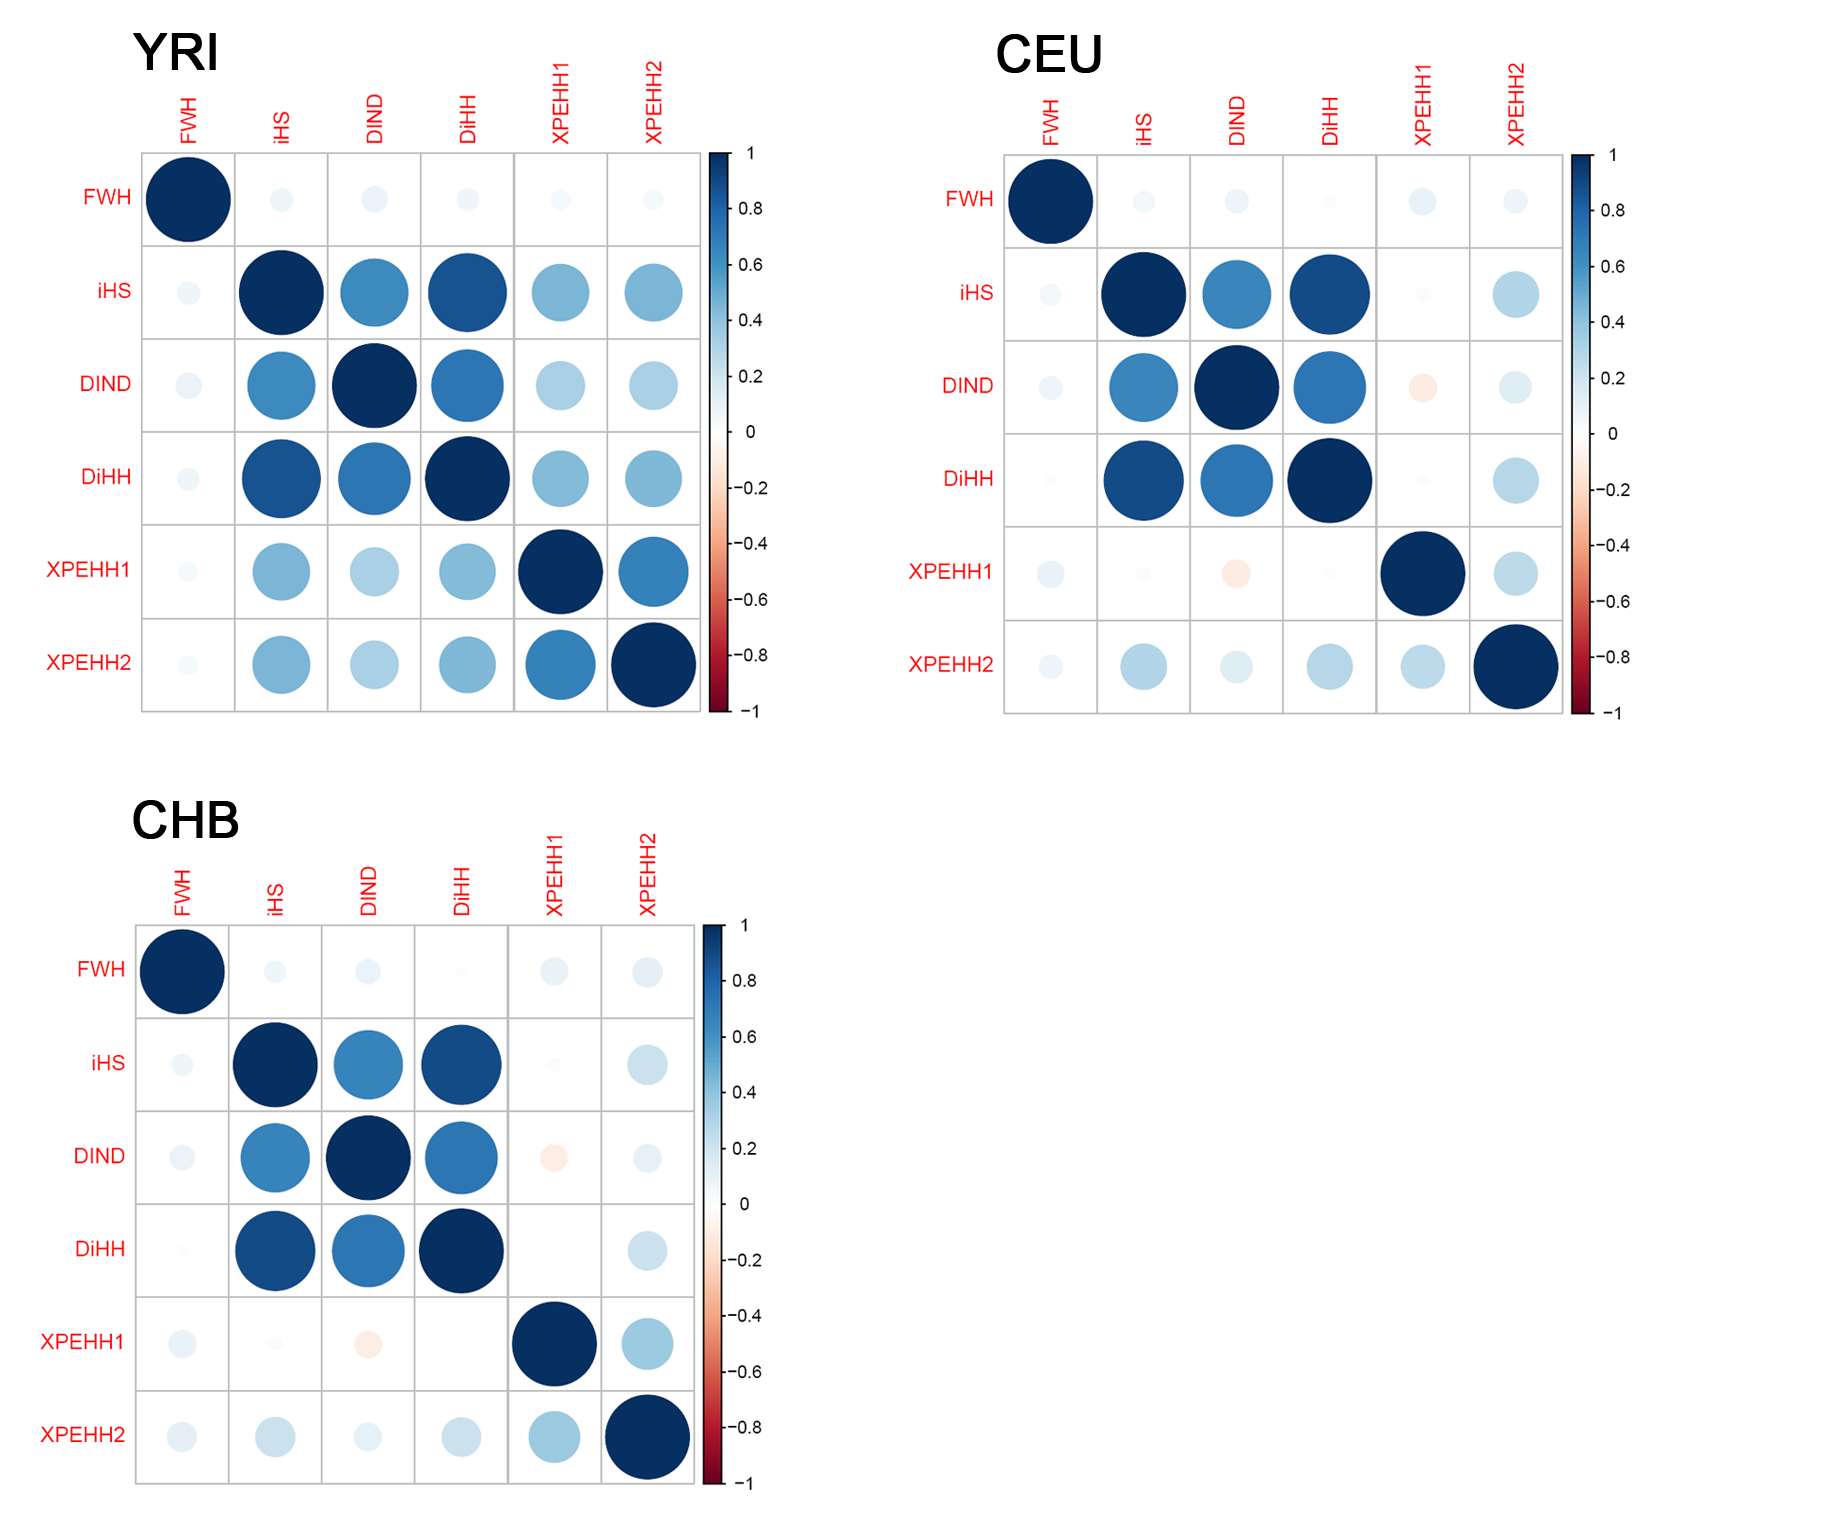


**Figure S22. Correlations between neutrality statistics in the YRI, CEU and CHB 1000G populations.** The correlation matrices were computed using 10,000 SNPs randomly sampled per chromosome. In the YRI population, XP_EHH1 and XP_EHH2 were respectively computed with the CEU and the CHB samples used as reference populations. In the CEU population, XP_EHH1 and XP_EHH2 were respectively computed with the YRI and the CHB samples used as reference populations. In the CHB population, XP_EHH1 and XP_EHH2 were respectively computed with the YRI and the CEU samples used as reference populations. Note the strong dependency of the XP-EHHs to the choice of the reference populations. We checked that similar numbers of sweeps are inferred after excluding these two statistics from the analysis of the 1000G populations (see the previous figure).


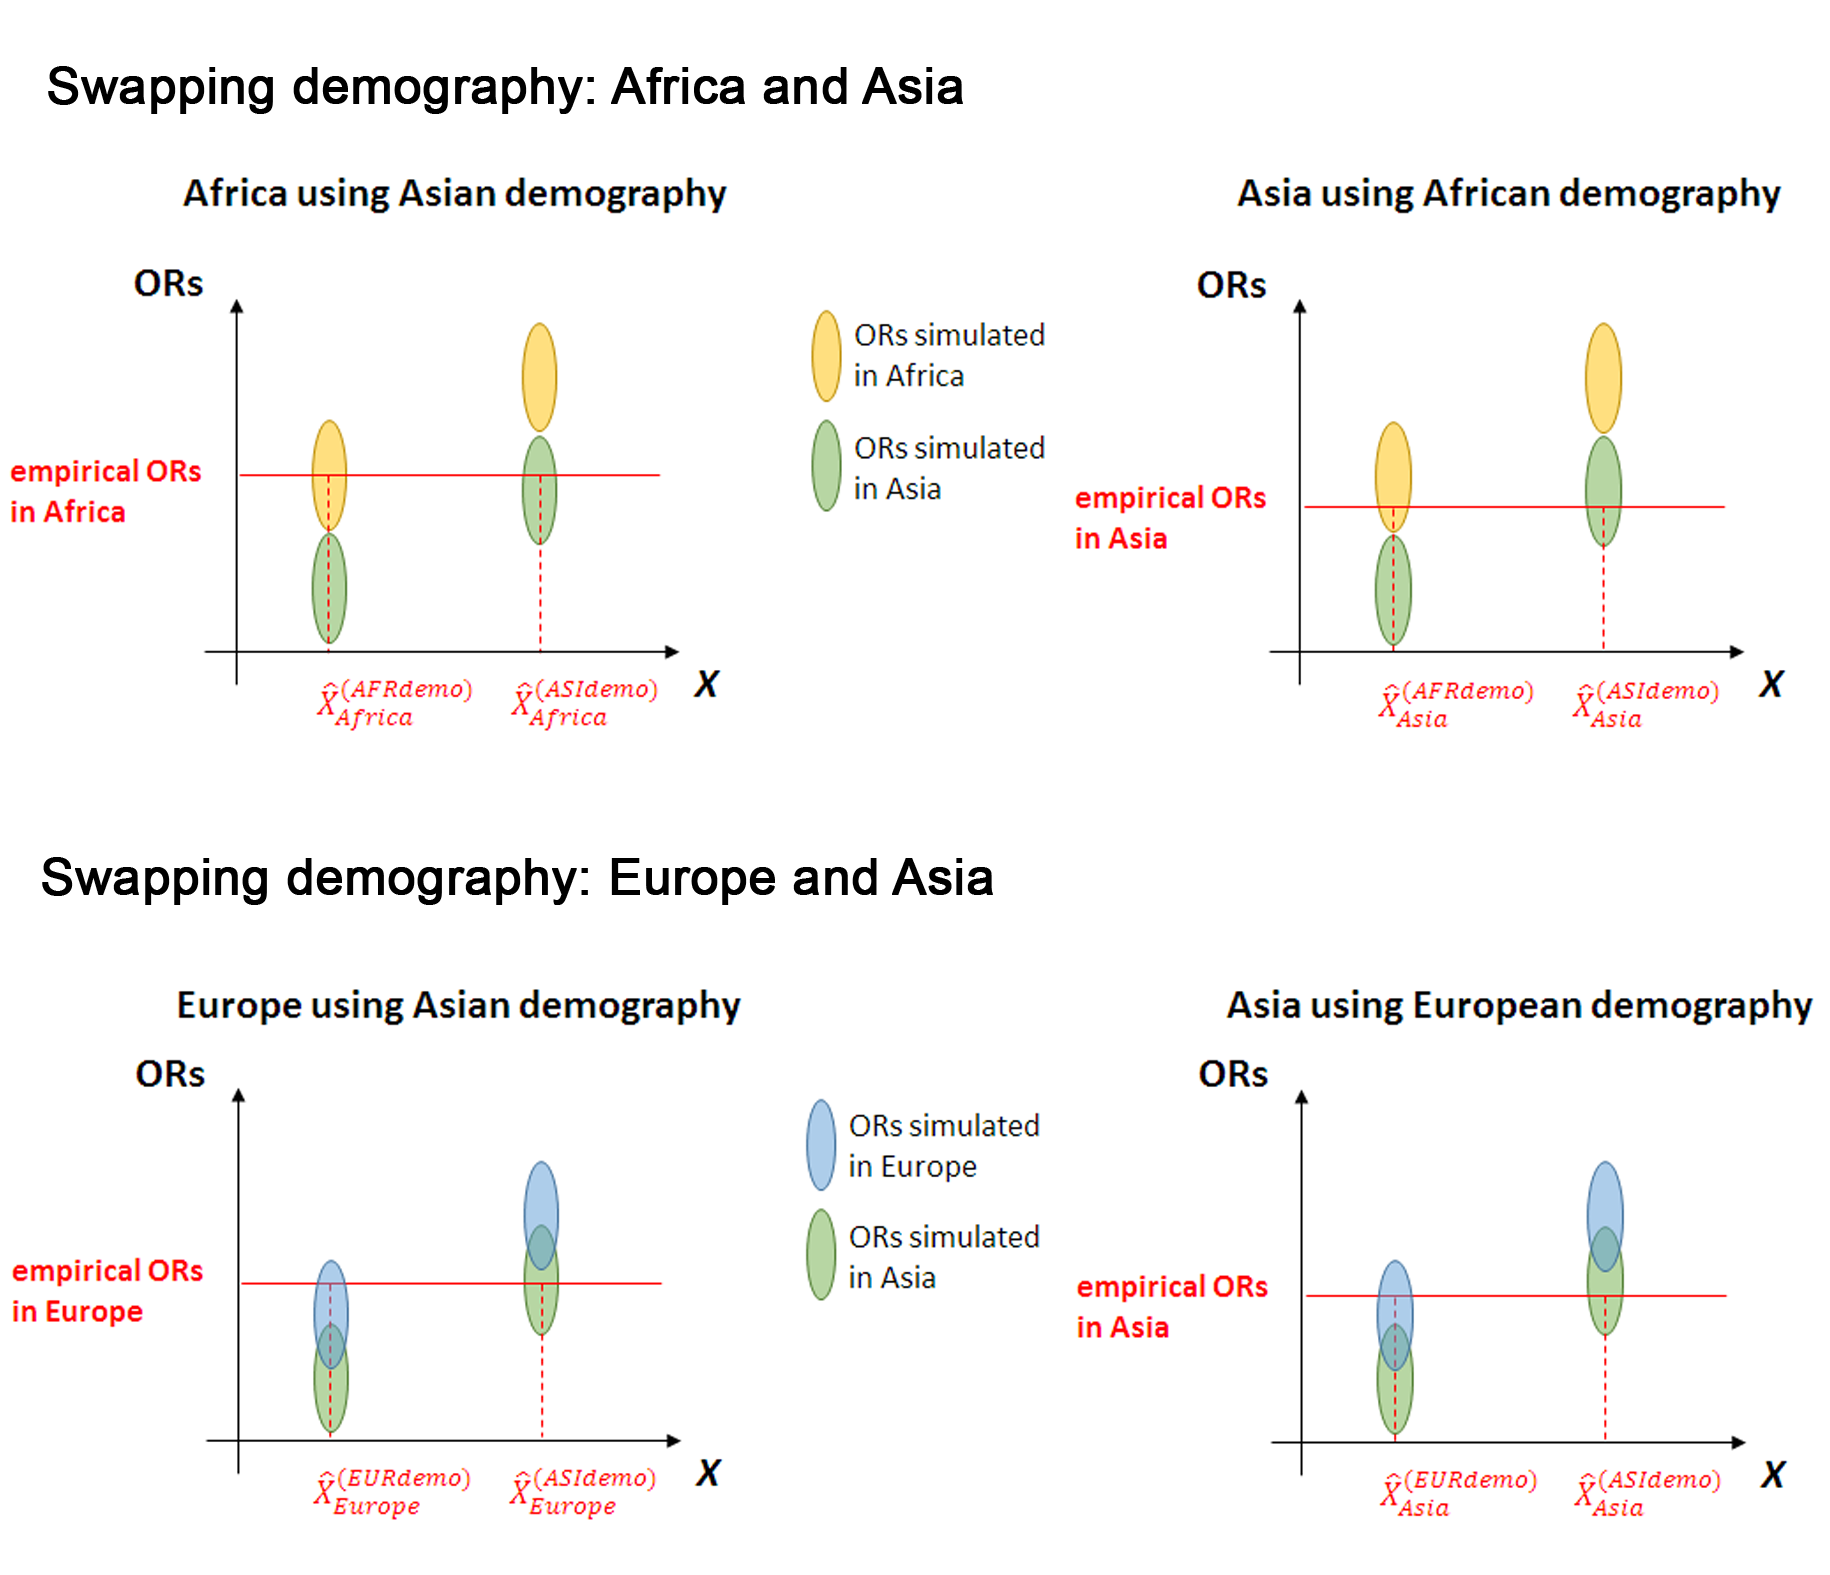


**Figure S23. Explanatory figure: influence of the demography on the estimations of *X*.** Graphic illustration showing the influence of demography on the estimations of *X*. Fake distributions of simulated ORs (y-axis) as represented in Figure 2 and in Figure S3 (the differences between ORs are exacerbated for convenience). The (x-axis) are the estimations obtained under various assumptions. Subscripts indicate the population in which the estimations are performed. Superscripts indicate the simulated ORs used for estimations, e.g., “AFRdemo” stands for “African demography assumed”. The estimations obtained under the “correct” model are systematically indicated, , and . The higher estimations of *X* in Africa under an Asian demographic model, , are due to lower simulated ORs in Asia. They are higher because the simulated ORs generated by larger *X* provide a better fit with empirical African 1000G ORs. Same explanations for the higher estimations of *X* in Europe assuming an Asian demographic model, (i.e., assuming a bottleneck four times stronger).


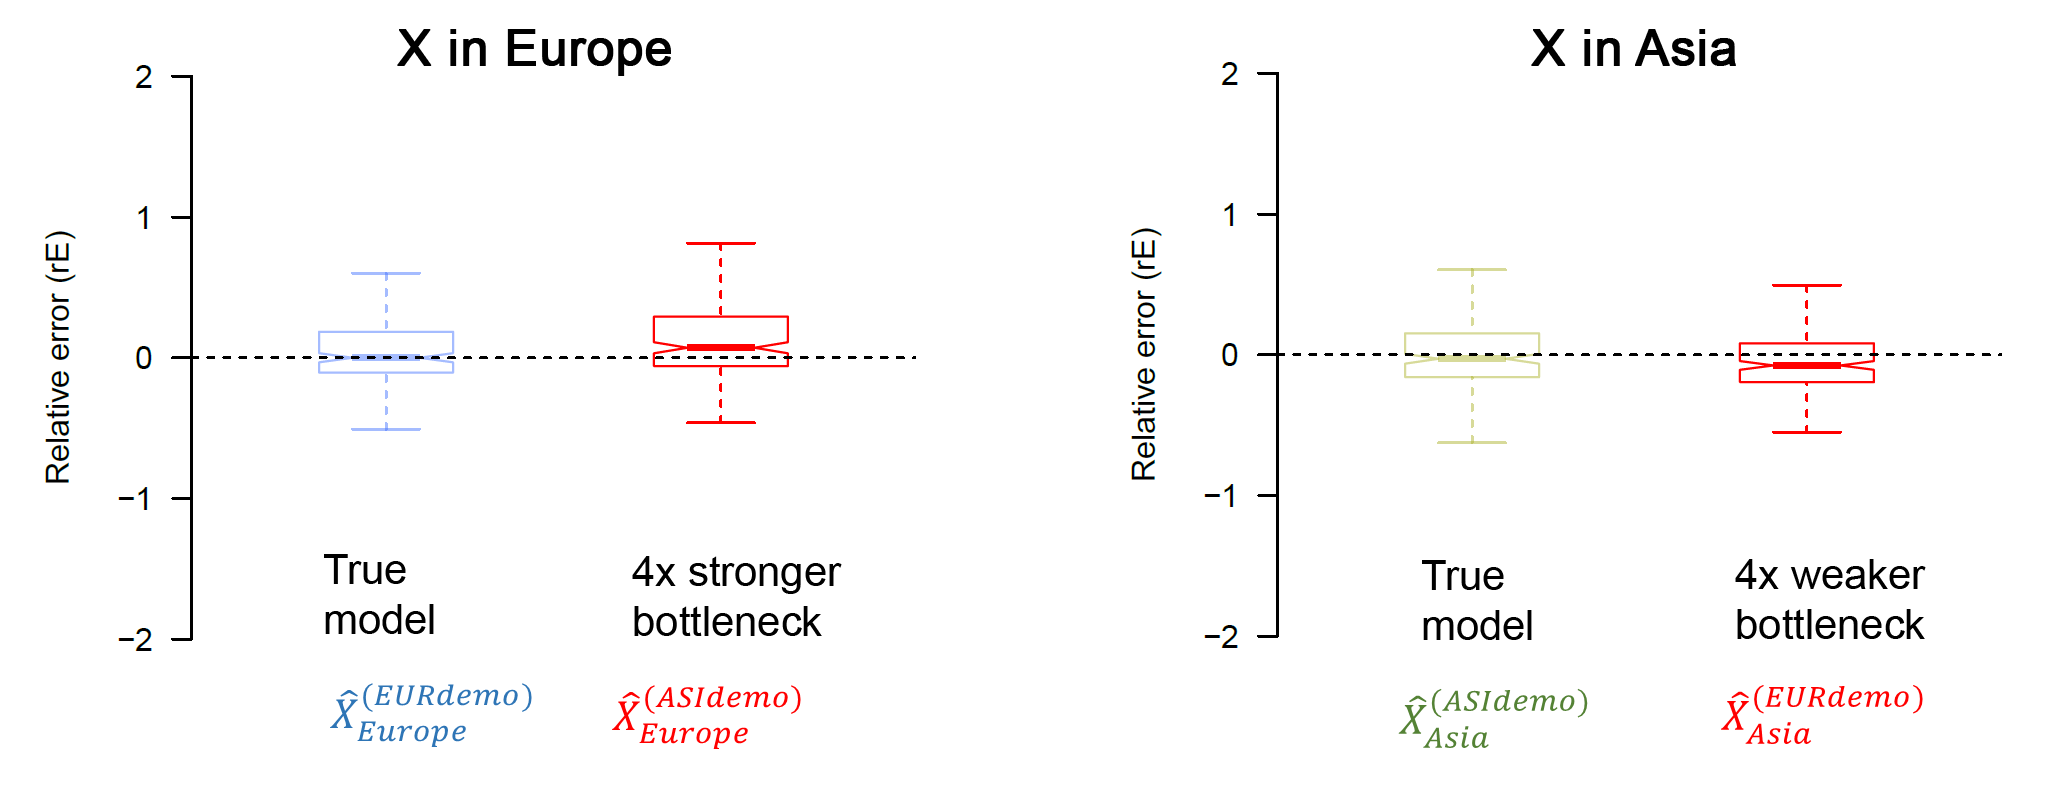


**Figure S24. Estimations biases due to bottleneck intensities incorrectly specified.** Pseudo-empirical data were used to evaluate the estimations biases due to bottleneck intensities incorrectly specified. The (x-axis) represent the estimations of *X* obtained under various assumptions. The subscripts indicate the population in which the estimations are performed. The superscripts (in brackets) indicate the demographic model used, e.g., “EURdemo” stands for “European demography assumed”. (Left hand side). We simulated 200 new WGS European data and use them as empirical data setting (i) a European demography ( labelled “True model”) and (ii) an Asian demography i.e., a four times stronger bottleneck ( labelled “4x stronger bottleneck”). (Right hand side) We simulated 200 new WGS Asian data and analyze them as empirical data setting (i) an Asian demography ( labelled “True model”) and (ii) a European demography i.e., a four times weaker bottleneck ( labelled “4x weaker bottleneck”).


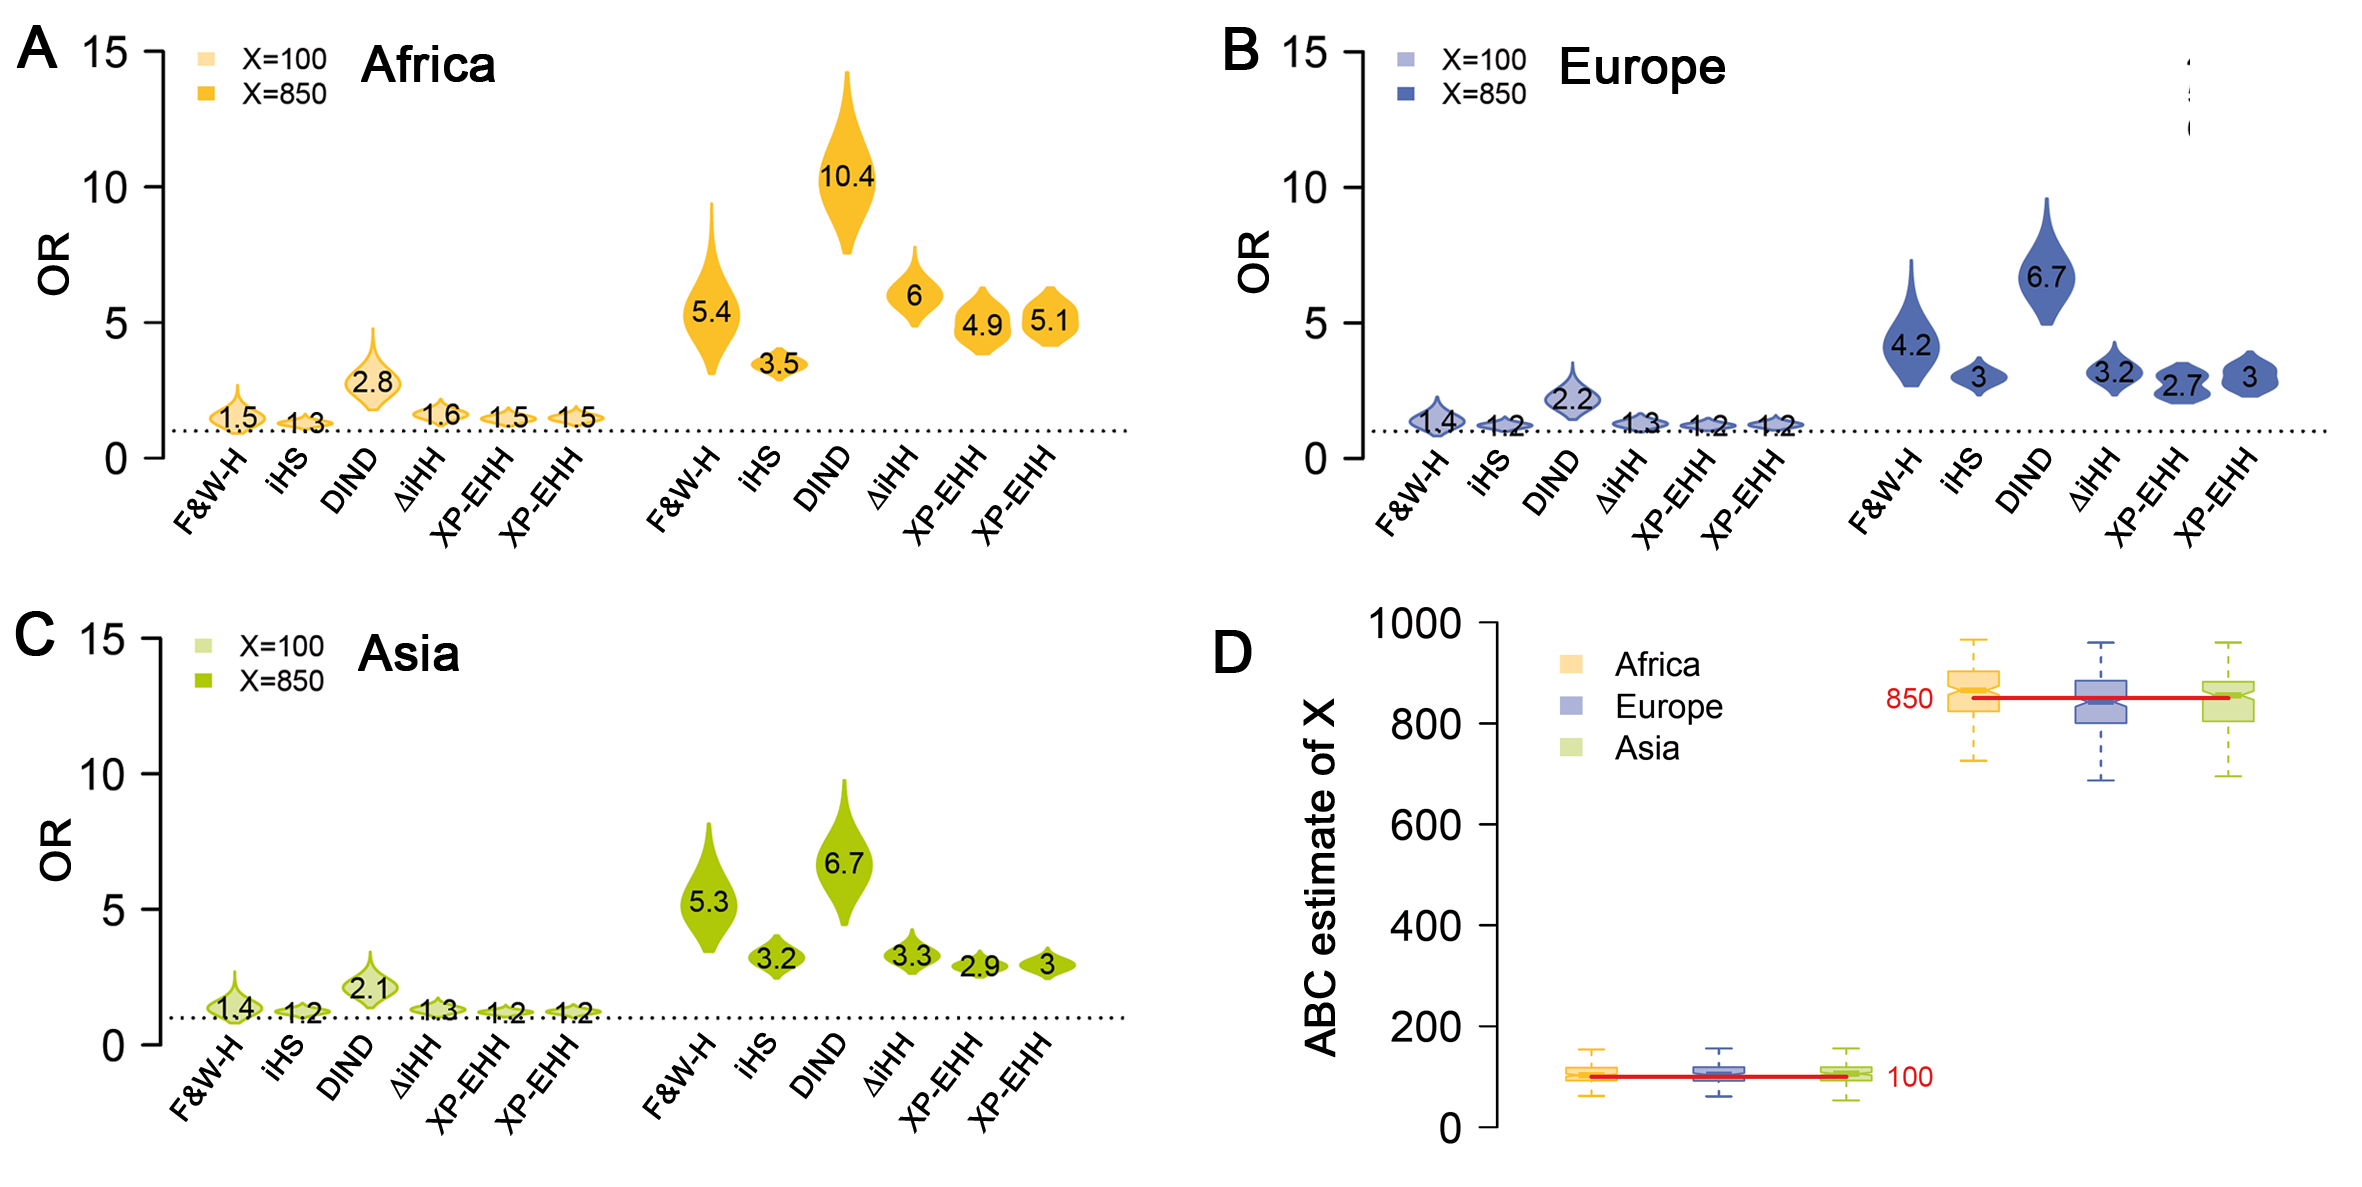


**Figure S25. ABC estimations using extended priors for *X* under the sweep scenario.** (**A-C**) ORs obtained with fixed numbers of sweeps per simulated WGS data (1,000 simulated WGSs in each case). To insert high numbers of sweeps in simulated WGS data, we inserted selected regions of 1Mb instead of 5Mb. (**D**) Accuracy of the ABC estimations assessed by means of simulated WGSs used as pseudo-empirical data, each containing 100 or 850 selective sweeps (200 pseudo-empirical data in each situation). *X* was randomly drawn from . Each boxplot displays the 200 point estimates obtained. The horizontal red lines indicate the true values of *X*.


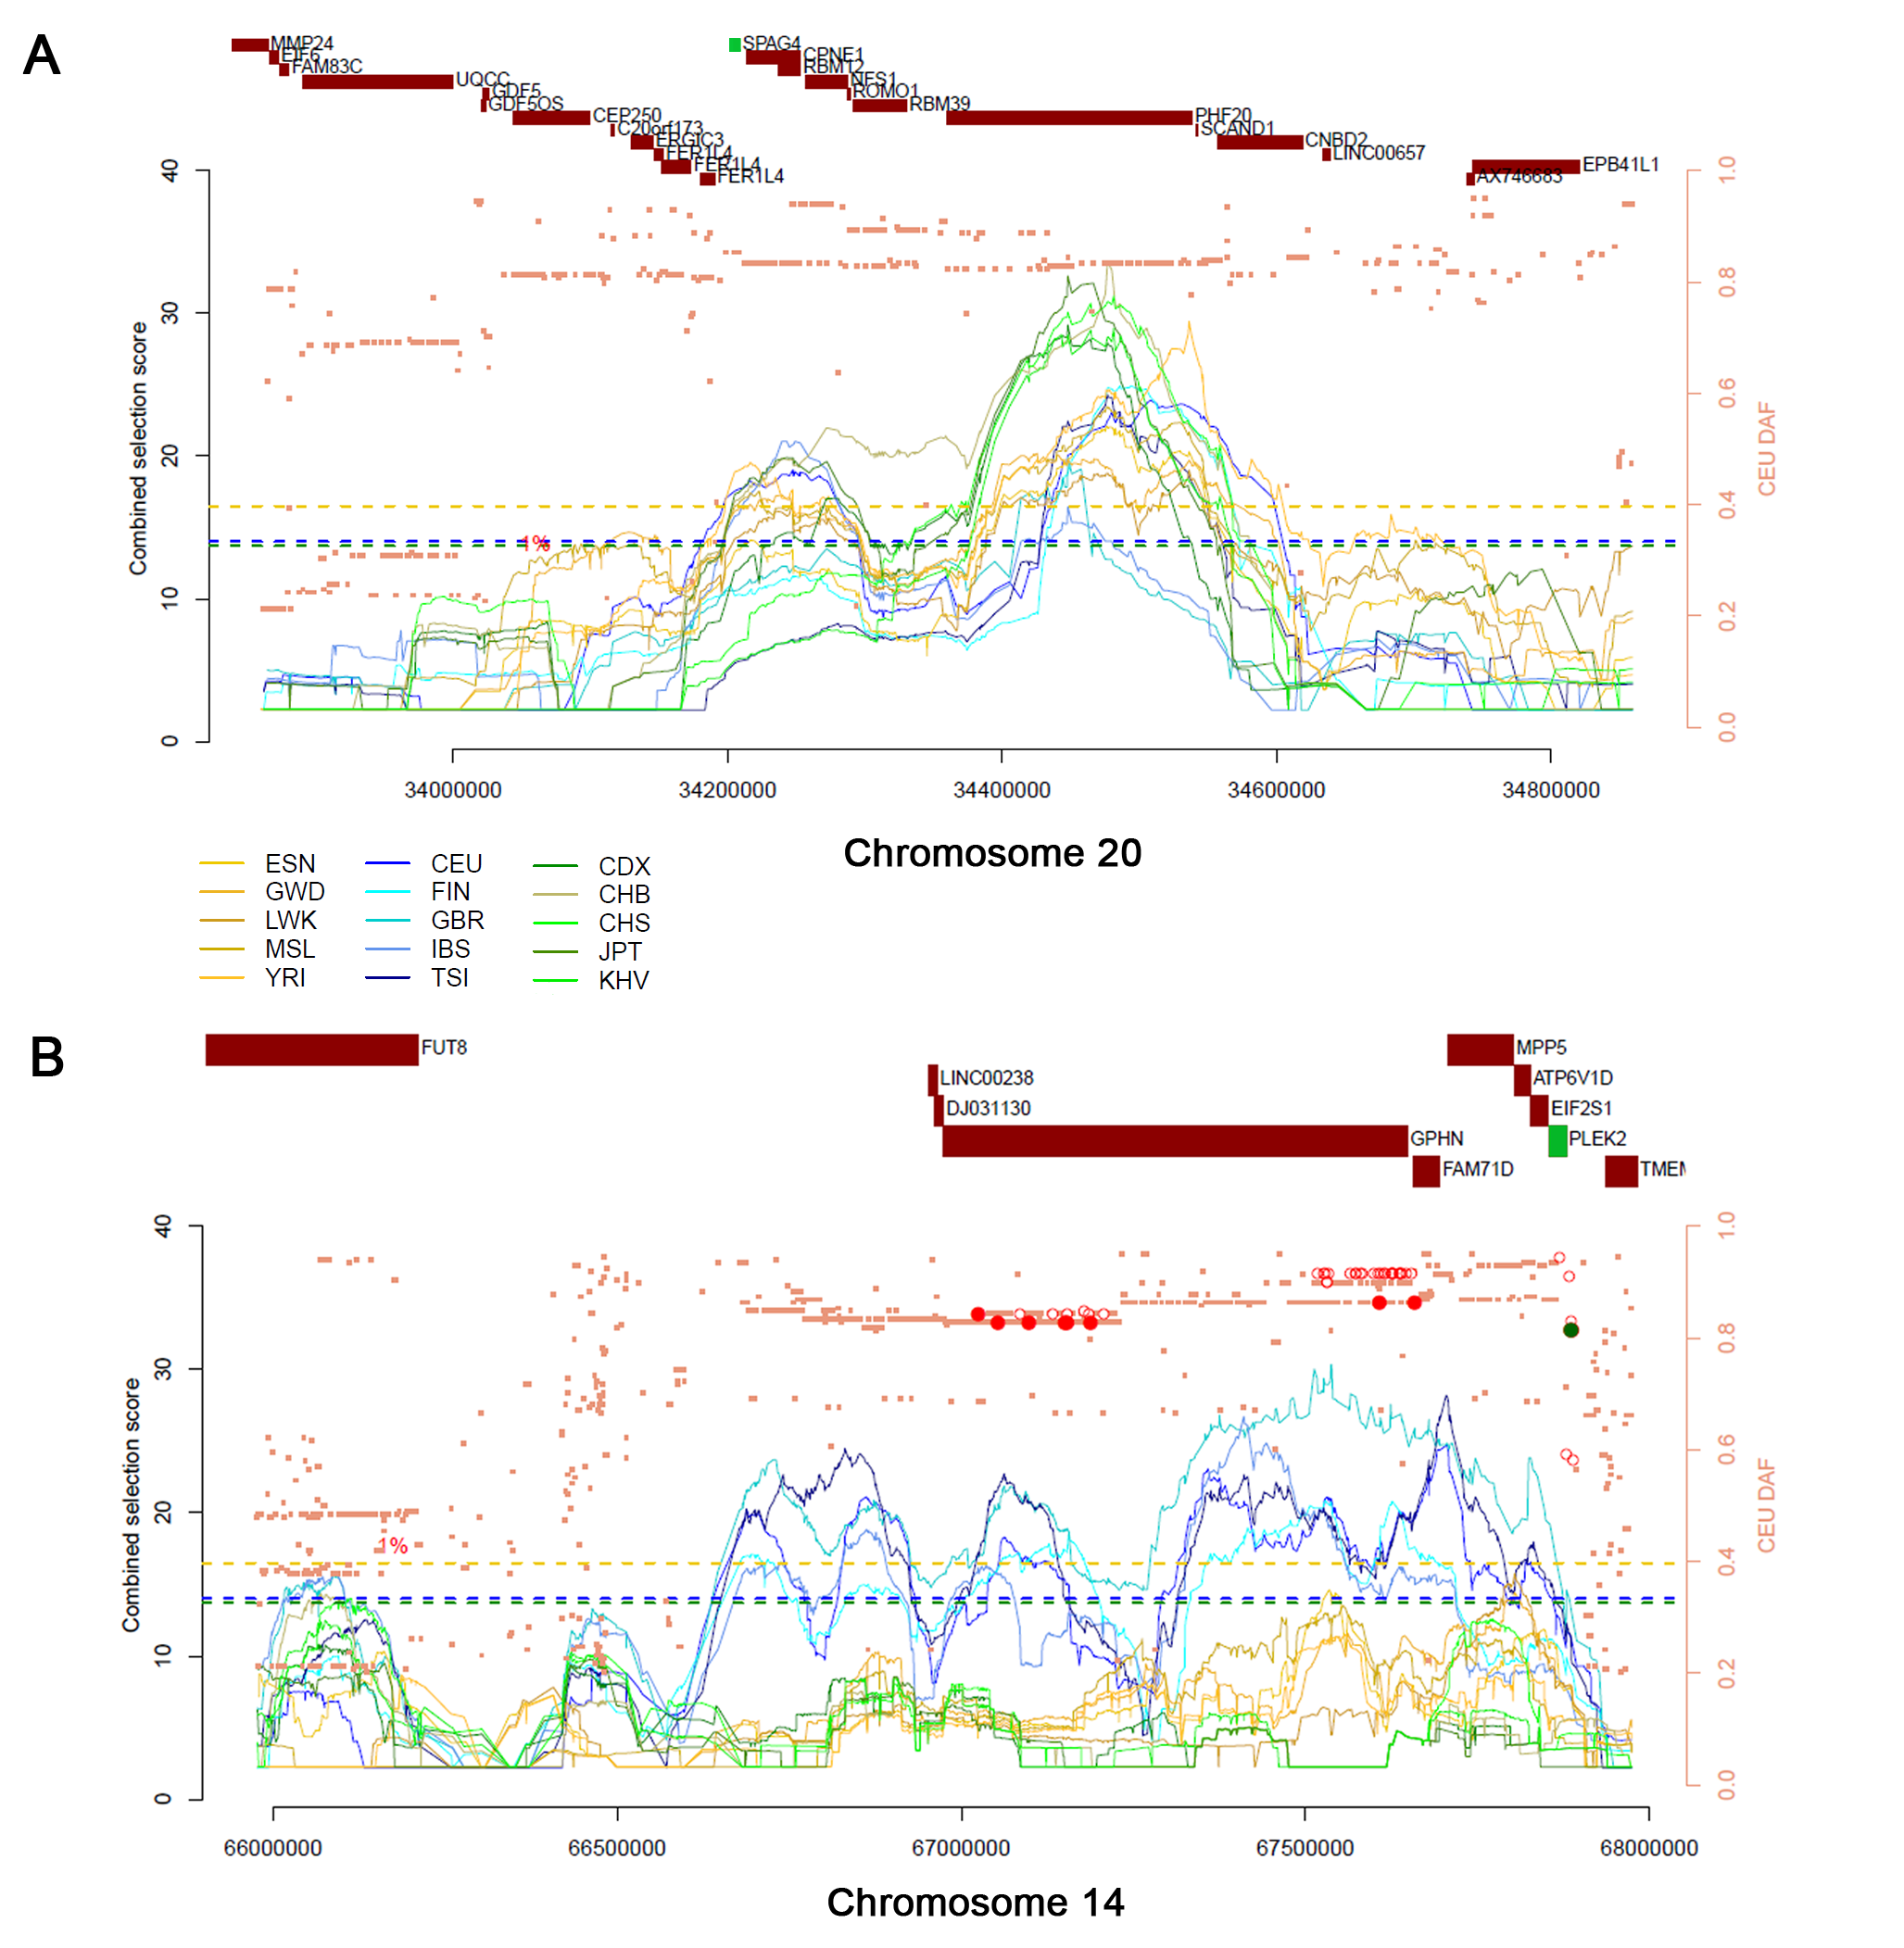


**Figure S26. Two genomic regions enriched in candidate SNPs.** Two examples of genomic regions potentially under selection identified using the neutrality statistics used to estimate *X*. Broken lines are the combined selection score computed 100kb around each PSV SNP. Horizontal dashed lines are the corresponding significance thresholds (*P*<0.01). (**A**) A genomic region identified in all populations (Table S3) that encompasses the *SPAG4* gene (green) associated with impaired sperm motility and infertility in drosophila. (**B**) A genomic region identified in all European populations only (Table S3) that encompasses the *PLEK2* gene (green). Only the allele(s) downregulating *PLEK2* in skin exposed to sun harbor signatures indicative of positive selection (indicated in red with the most significant eQTL indicated in green, *P*=1.4x10-5, GTEx database). The closed circles show genome-wide significant signals of selection revealed in CEU by means of iHS, DIND and ΔiHH tested separately.

**Table S1. 1000 Genome phase 3 populations analyzed.**

| Namesa | Populations | Sample sizes |
| --- | --- | --- |
| **African ancestry** |  |  |
| ESN | Esan | 99 |
| GWD | Gambian | 113 |
| LWK | Luhya | 99 |
| MSL | Mende | 85 |
| YRI | Yoruba | 108 |
| **East Asian ancestry** |  |  |
| CDX | Dai Chinese | 93 |
| CHB | Han Chinese | 103 |
| CHS | Southern Han Chinese | 105 |
| JPT | Japanese | 104 |
| KHV | Kinh | 99 |
| **European ancestry** |  |  |
| CEU | CEPH (Utah residents) | 99 |
| GBR | British | 91 |
| FIN | Finnish | 99 |
| IBS | Spanish | 107 |
| TSI | Tuscan in Italy | 107 |
|  |  |  |
| Total |  | 1511 |

aESN (Esan in Nigeria), GWD (Gambian in Western Division, Mandinka), LWK (Luhya in Webuye, Kenya), MSL (Mende in Sierra Leone) and YRI (Yoruba in Ibadan, Nigeria), CEU (Utah residents), GBR (British in England and Scotland), FIN (Finnish in Finland), IBS (Iberian Populations in Spain) and TSI (Tuscan in Italy), CDX (Chinese Dai in Xishuangbanna, China), CHB (Han Chinese in Beijing, China), CHS (Southern Han Chinese, China), JPT (Japanese in Tokyo, Japan) and KHV (Kinh in Ho Chi Minh City, Vietnam).
